# Supplementary material for: Anti-glioblastoma effects of phenolic variants of benzoylphenoxyacetamide (BPA) with high potential for blood brain barrier penetration
Source: PubMed Central journal article supplement (PMC8888627; doi:10.1038/s41598-022-07247-8), 2022-03-01
Supplement: 41598_2022_7247_MOESM1_ESM.pdf [file 41598_2022_7247_MOESM1_ESM.pdf]

# ***Supplementary Materials***

*<sup>1</sup>H-NMR, <sup>13</sup>C-NMRs and Computed properties of HR48-HR65*

**Anti-glioblastoma effects of phenolic variants of benzoylphenoxyacetamide (BPA) with high potential for Blood Brain Barrier penetration.**

Joanna Stalinska<sup>c,d</sup>, Cecilia Vittori<sup>c,e</sup>, Charles H. Ingraham IV<sup>a</sup>, Sean C. Carson<sup>a</sup>, Karlie Plaisance-Bonstaff<sup>c</sup>, Adam Lassak<sup>c</sup>, Celeste Faia<sup>c</sup>, Susan B. Colley<sup>c</sup>, Francesca Peruzzi<sup>c</sup>, Krzysztof Reiss<sup>c\*</sup>, and Branko S. Jursic<sup>a,b\*</sup>

<sup>a</sup>Department of Chemistry, University of New Orleans, New Orleans, LA 70148, United States; <sup>b</sup>Stepharm llc., PO Box 24220, New Orleans, LA 70184, United States; <sup>c</sup>Neurological Cancer Research, Stanley S. Scott Cancer Center, Department of Medicine, LSU Health Sciences Center, New Orleans, LA 70112; <sup>d</sup>Department of Cell Biology, Faculty of Biochemistry, Biophysics and Biotechnology, Jagiellonian University, Cracow Poland; <sup>e</sup>Department of Biomedical and Clinical Sciences L. Sacco, University of Milan, Milan, Italy.

\*corresponding authors



# <sup>13</sup>C-NMR(DMSO-d<sub>6</sub>) Varian Mercury 400 plus

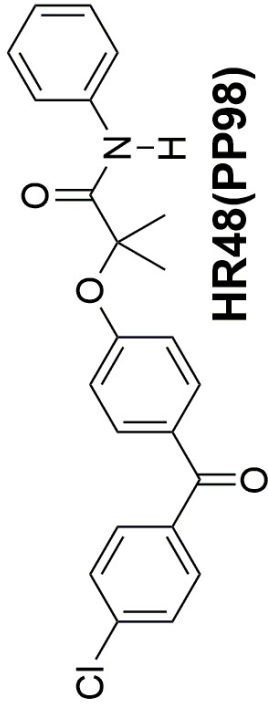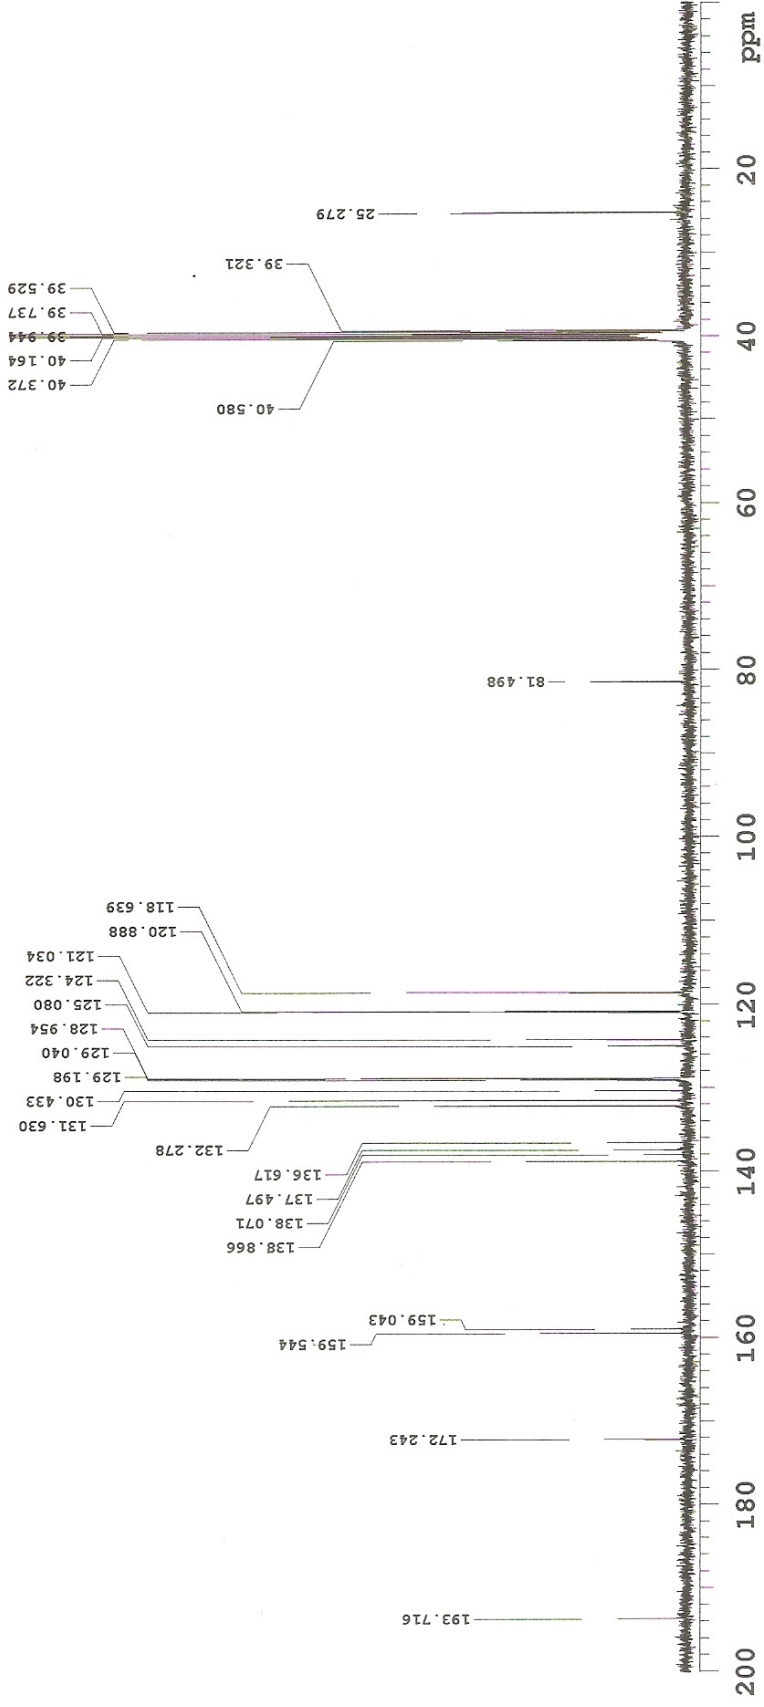





# <sup>1</sup>H-NMR(DMSO-d<sub>6</sub>) Varian Mercury 400 Plus

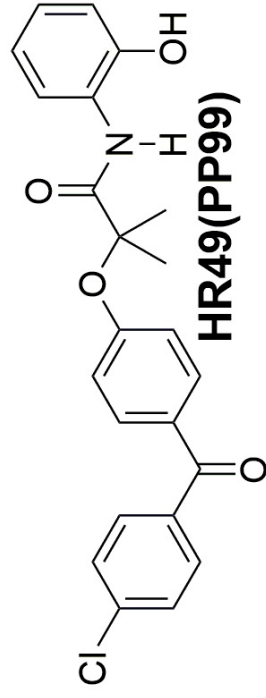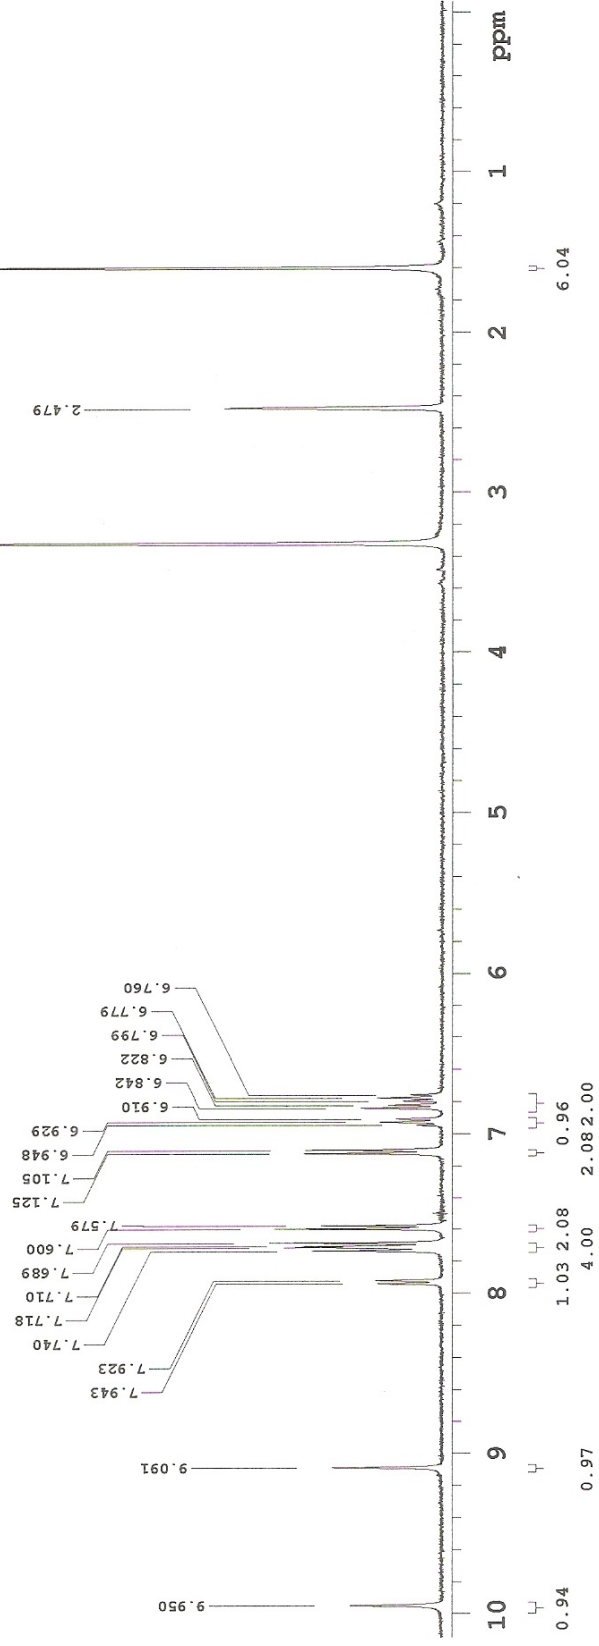

# <sup>1</sup>H-NMR(DMSO-d<sub>6</sub>) Varian Mercury 400 Plus

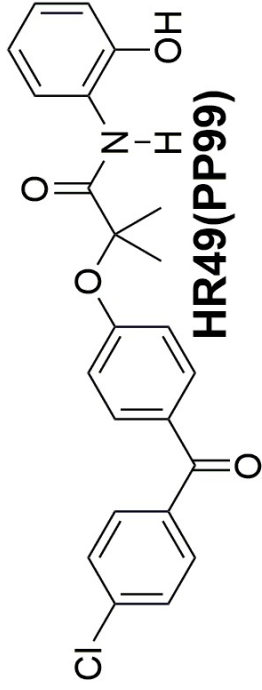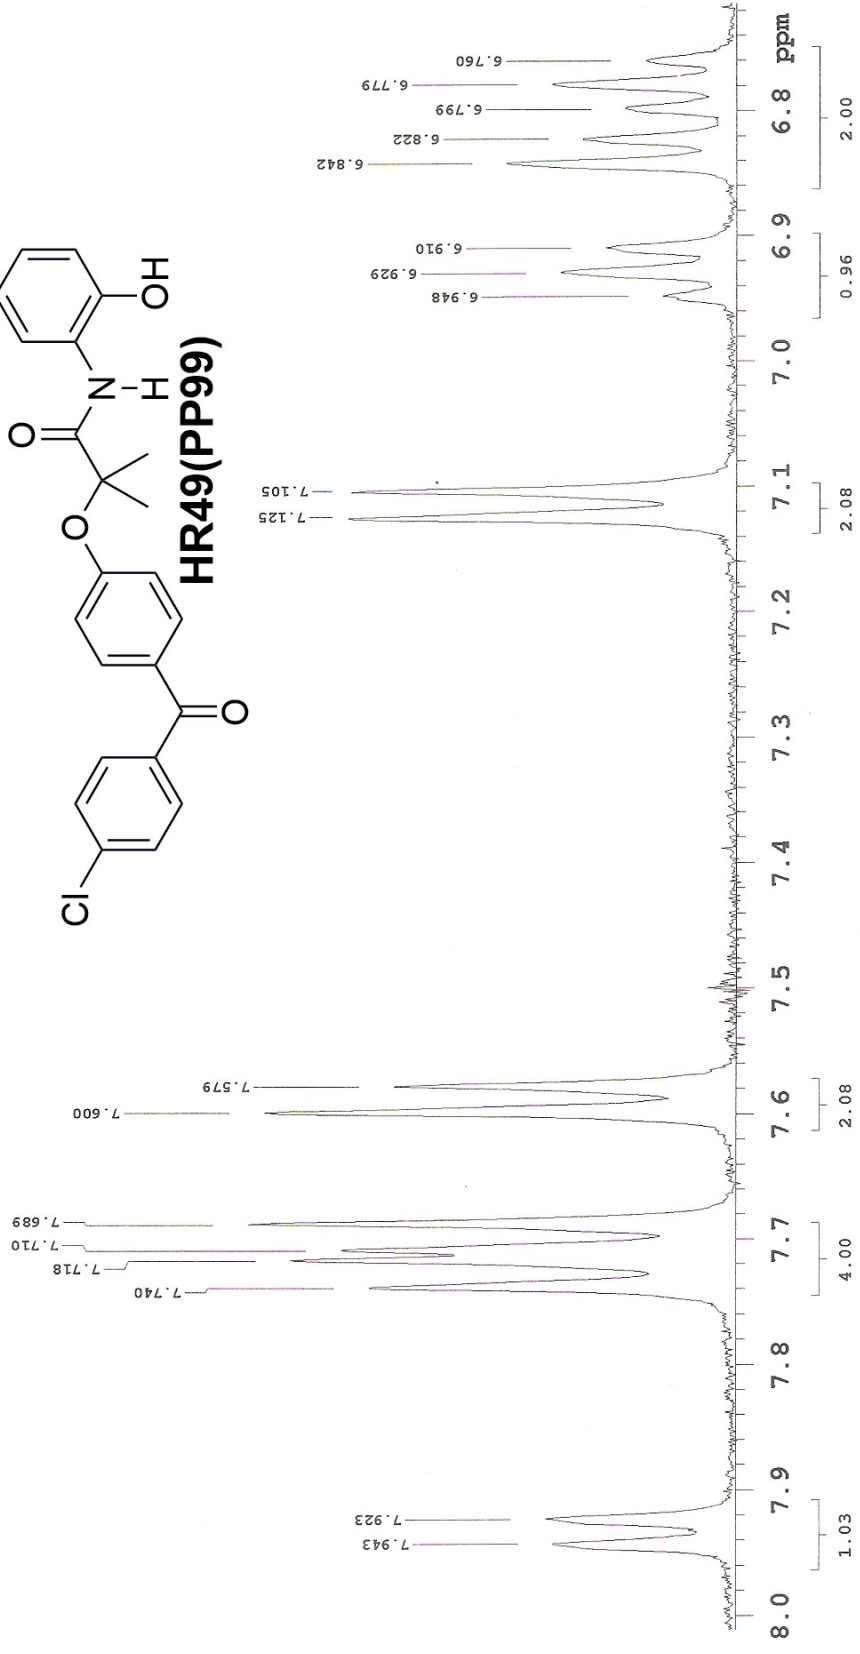

# <sup>13</sup>C-NMR(DMSO-d<sub>6</sub>) Varian Mercury 400 plus

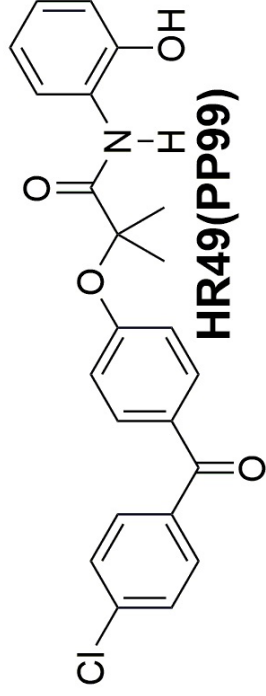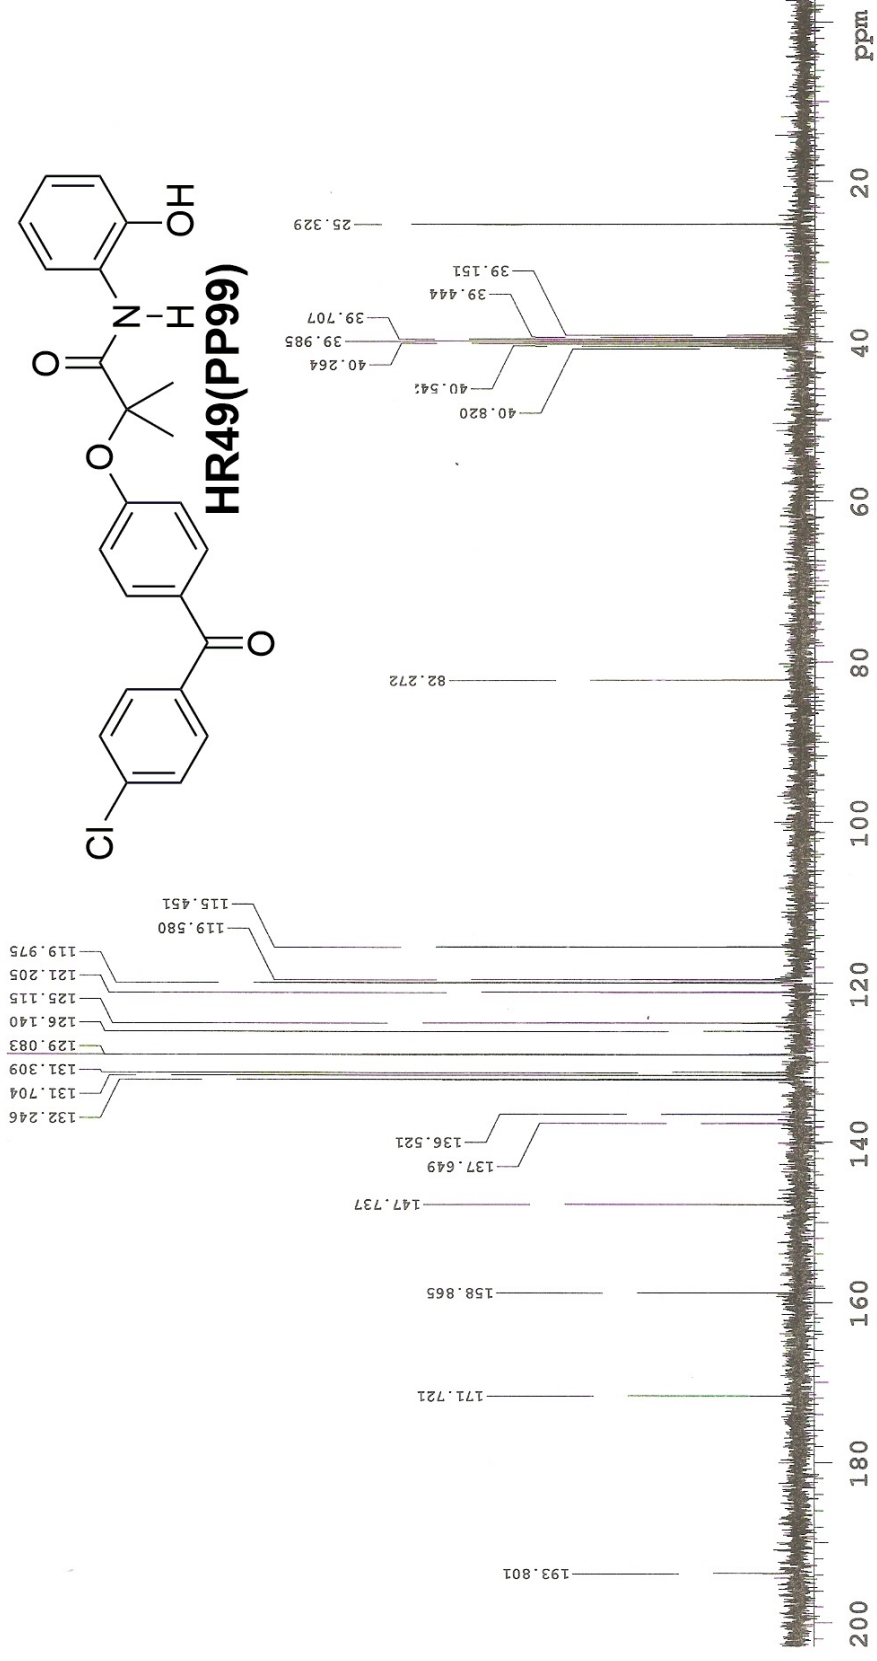

# $^1\text{H-NMR}$ ( $\text{DMSO-d}_6$ ) Varian Mercury 400 Plus

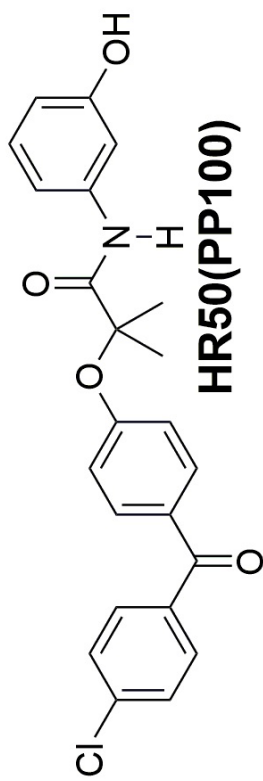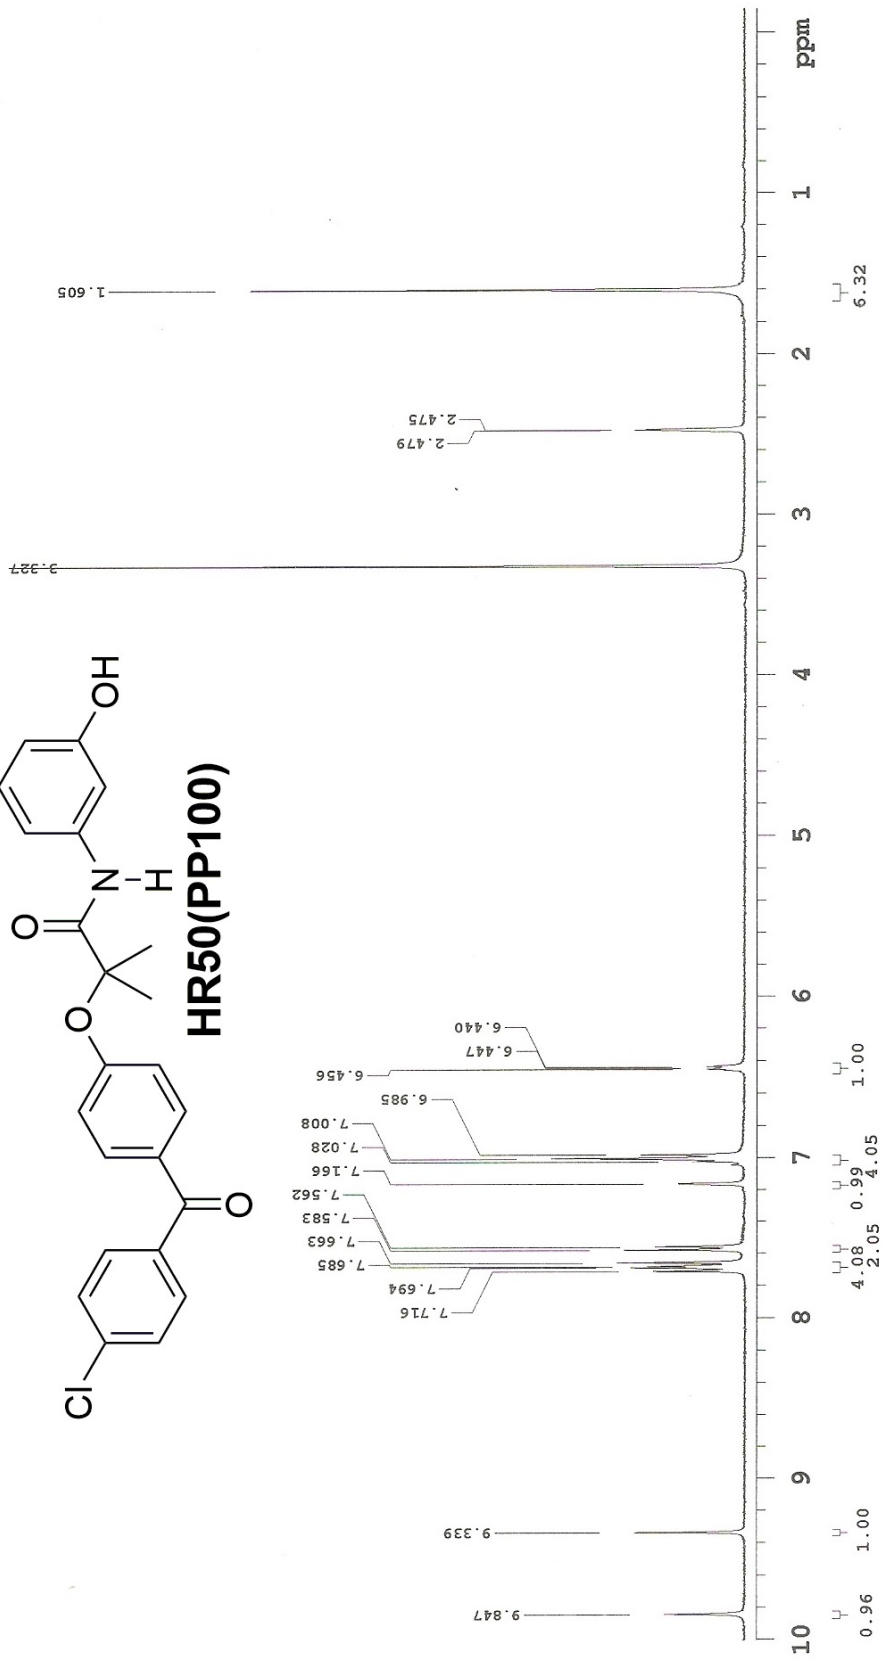

# <sup>13</sup>C-NMR(DMSO-d<sub>6</sub>) Varian Mercury 400 plus

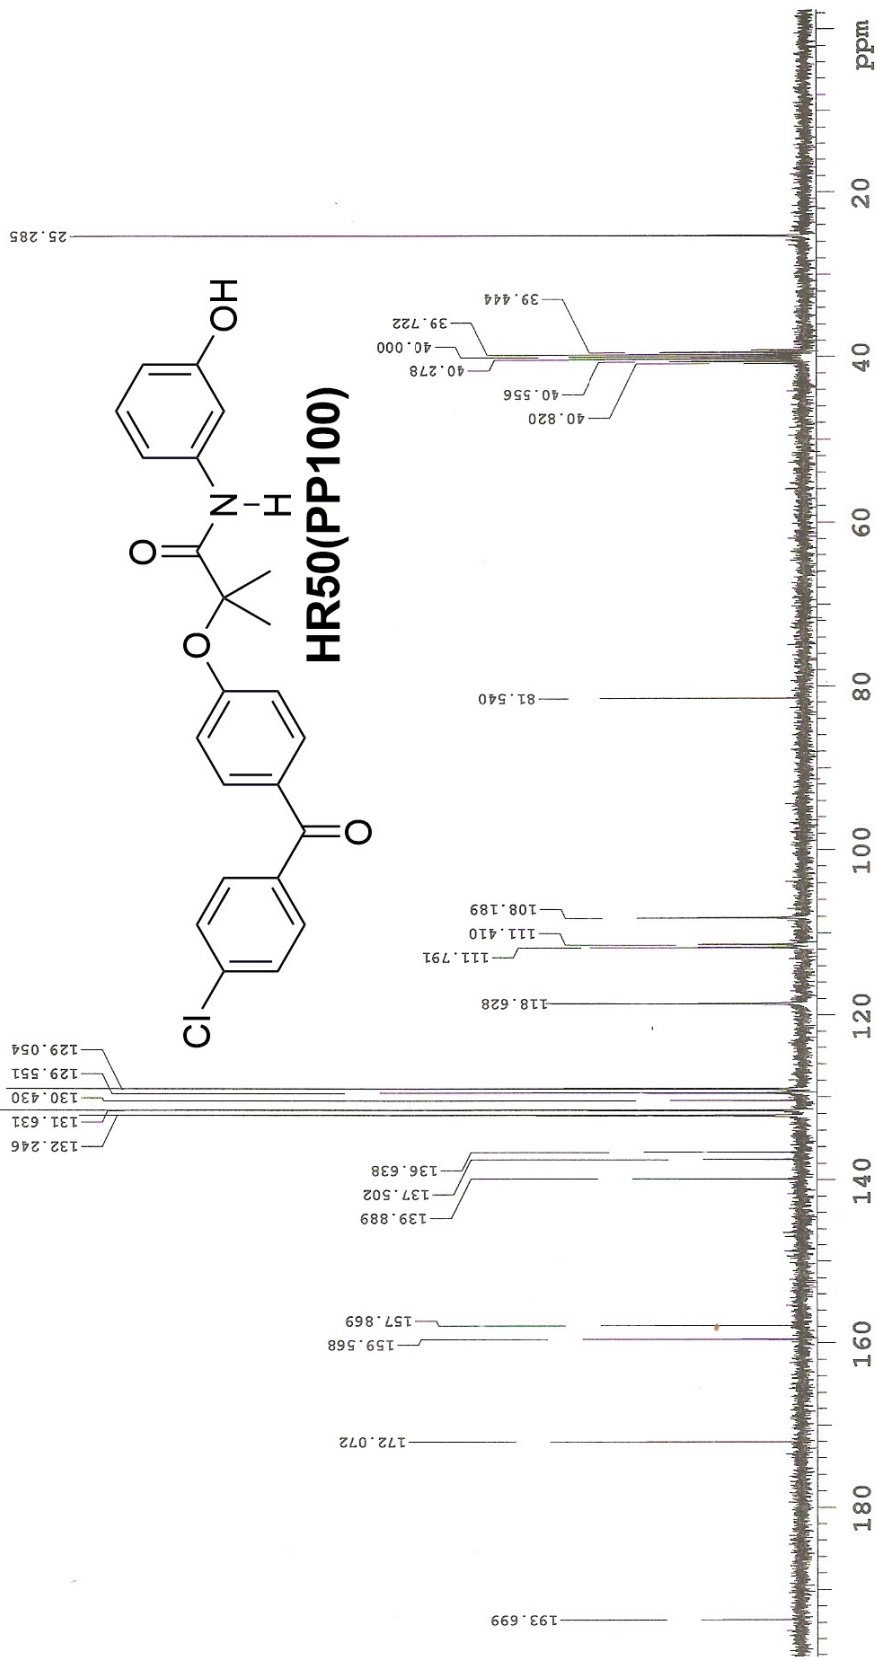

# $^1\text{H-NMR}(\text{CDCl}_3)$ Varian Mercury 400 Plus

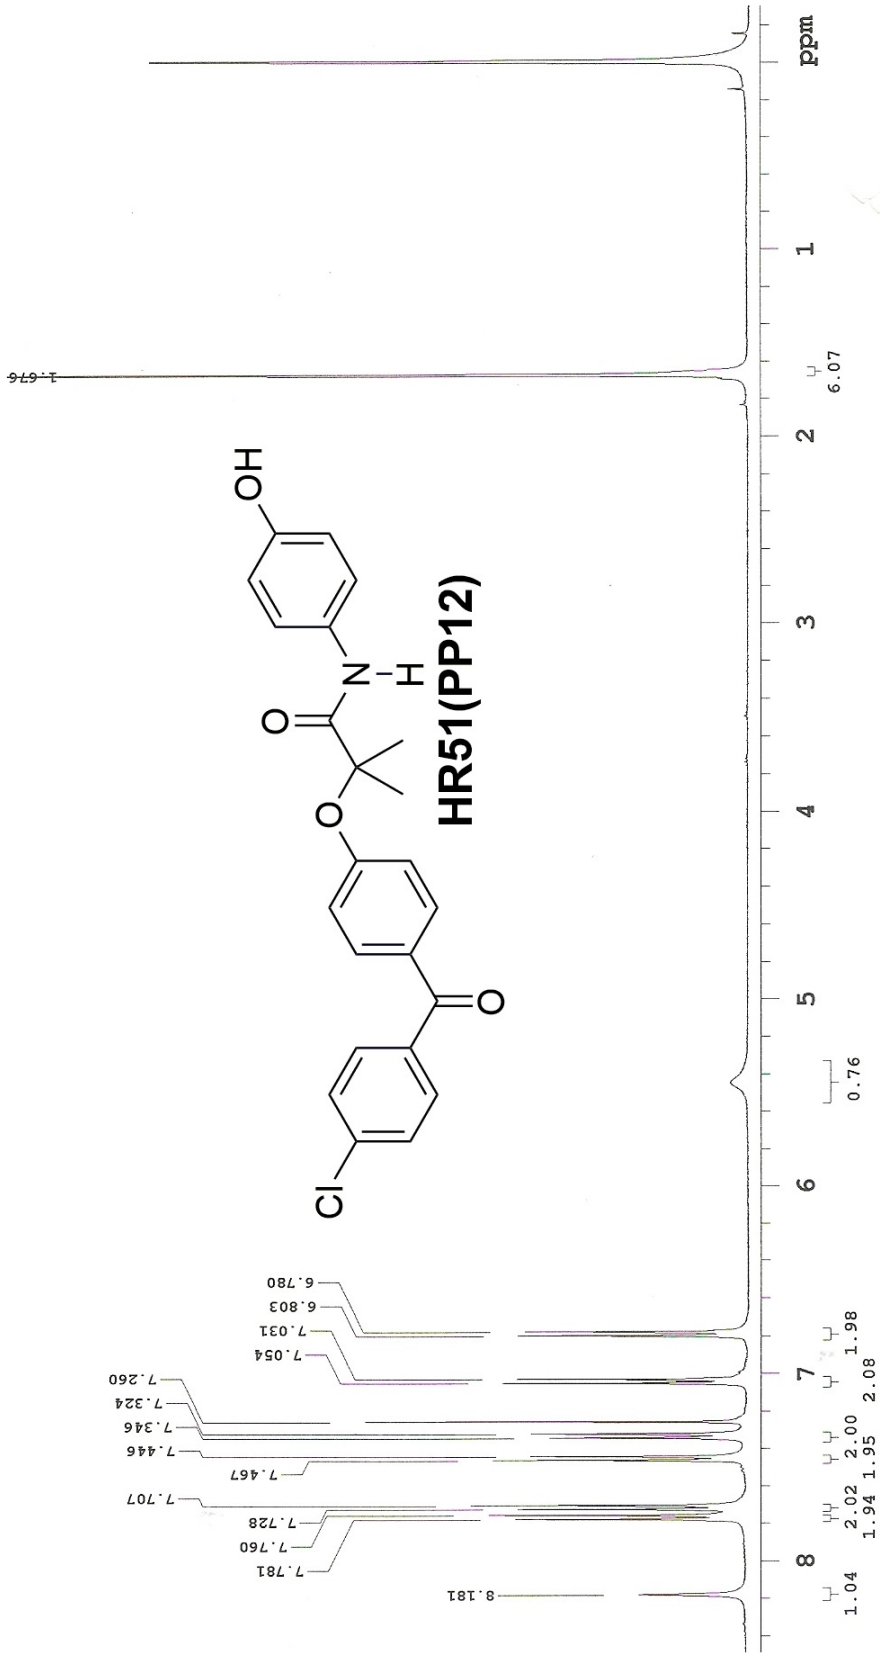

# $^1\text{H-NMR}(\text{CDCl}_3)$ Varian Mercury 400 Plus

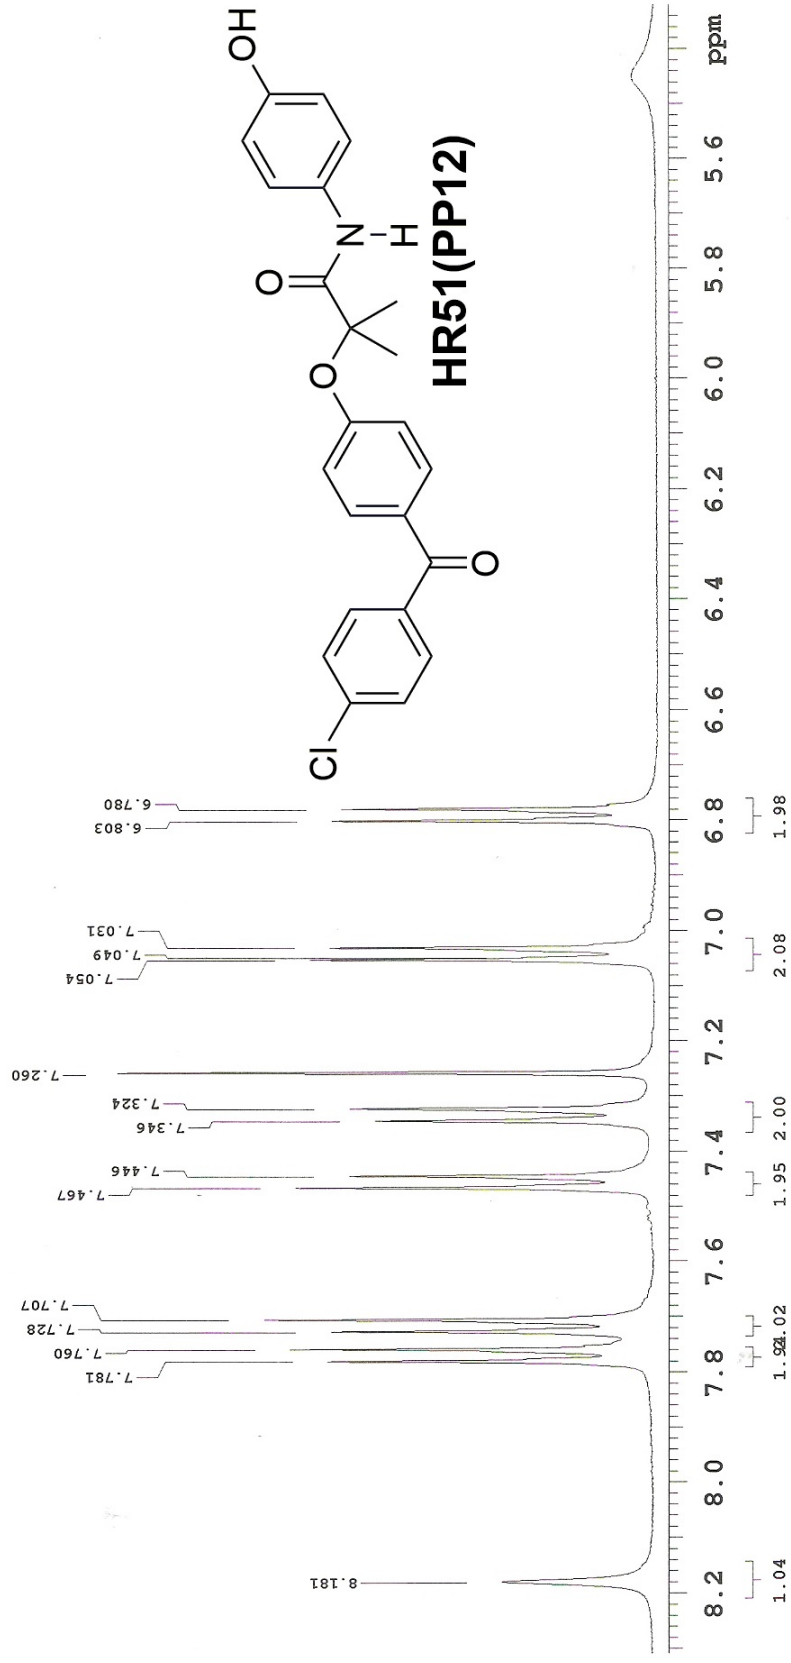

# <sup>1</sup>H-NMR(DMSO-d<sub>6</sub>) Varian Mercury 400 Plus

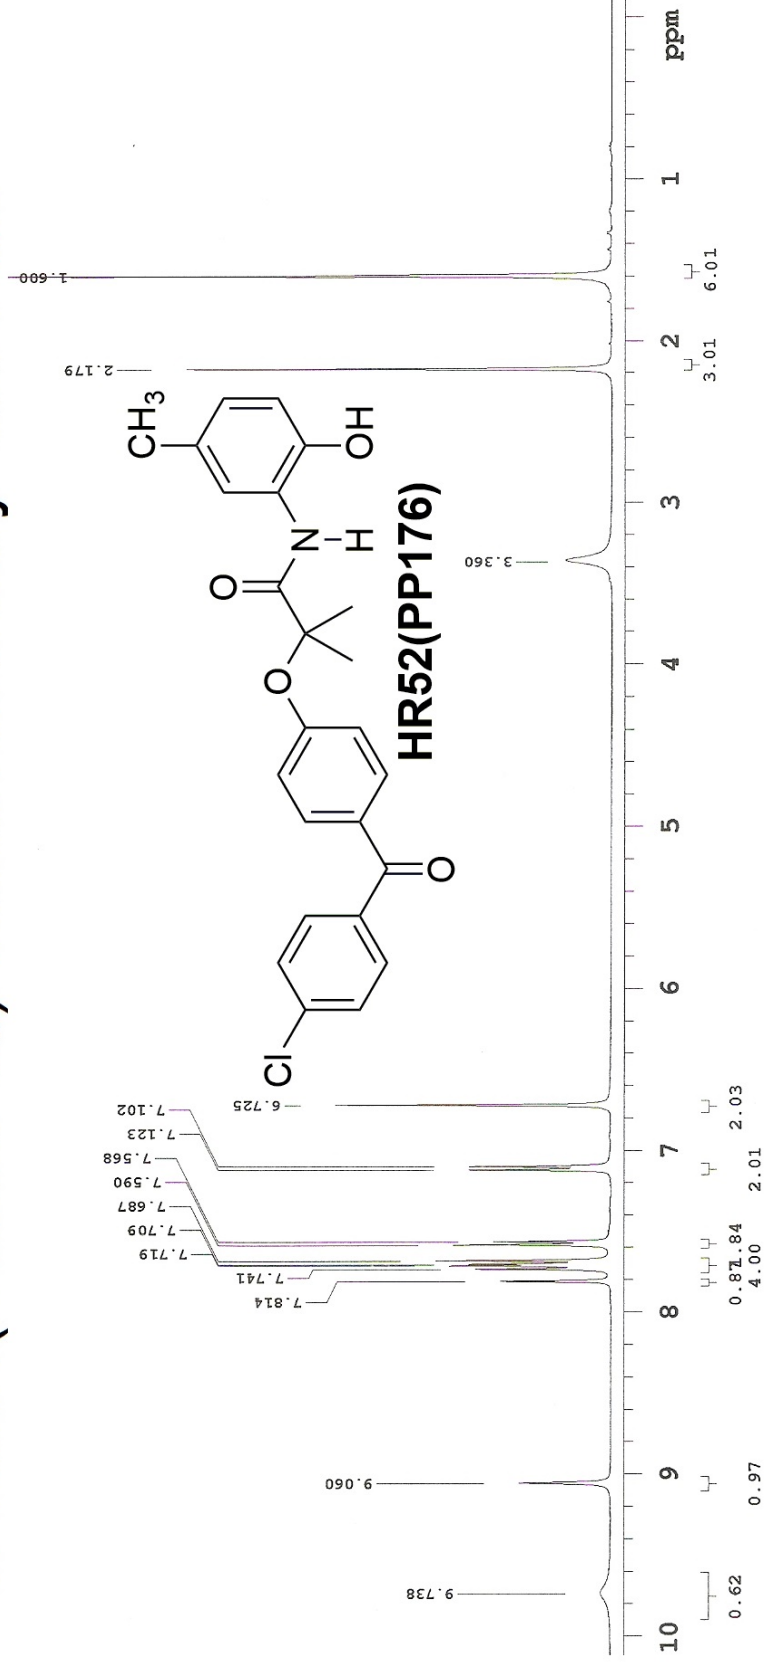



# $^1\text{H-NMR}$ ( $\text{DMSO-d}_6$ ) Varian Mercury 400 Plus

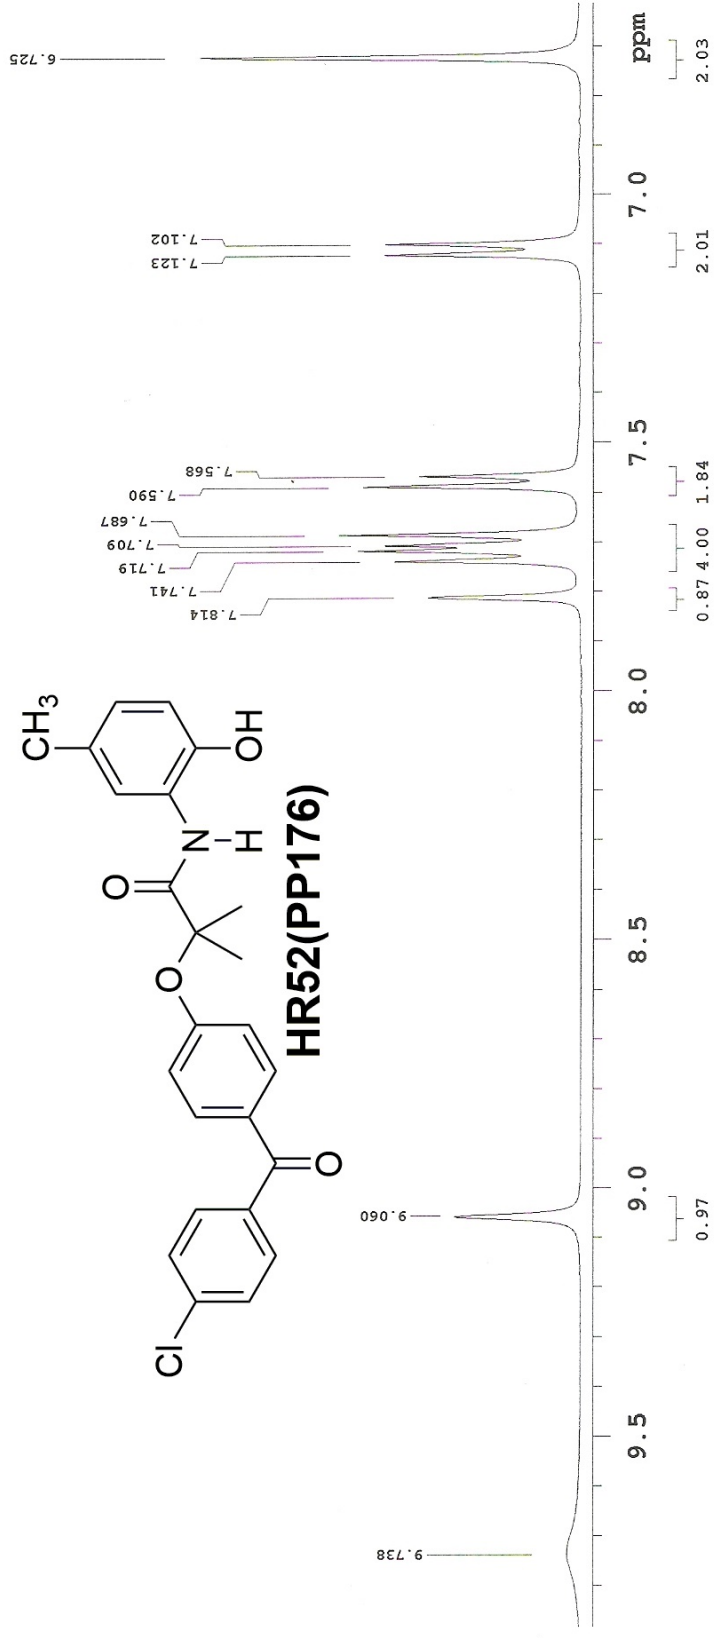

# $^{13}\text{C}$ -NMR(DMSO- $\text{d}_6$ ) Varian Mercury 400 plus

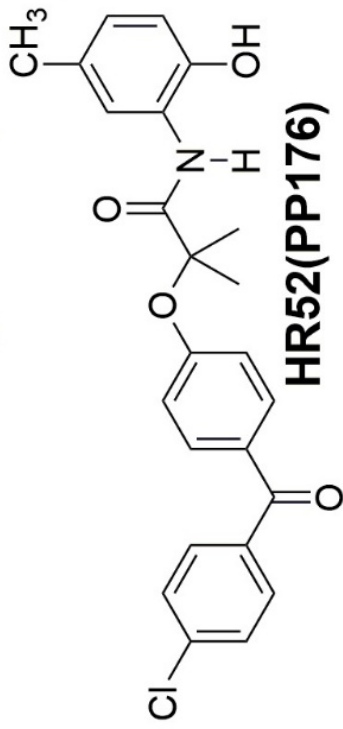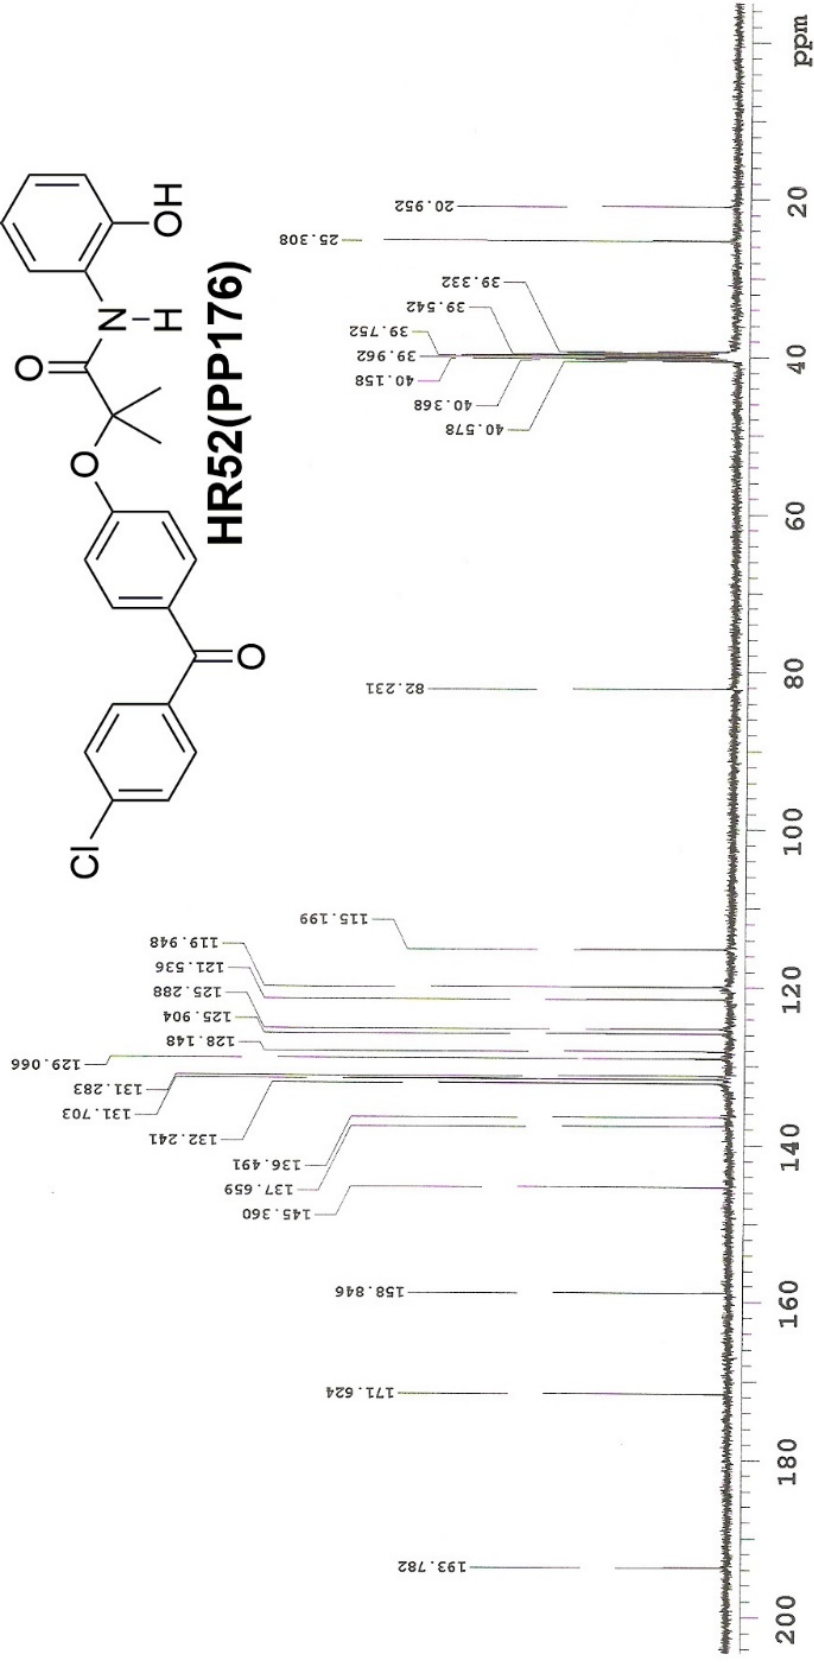

# <sup>1</sup>H-NMR(DMSO-d<sub>6</sub>) Varian Mercury 400 Plus

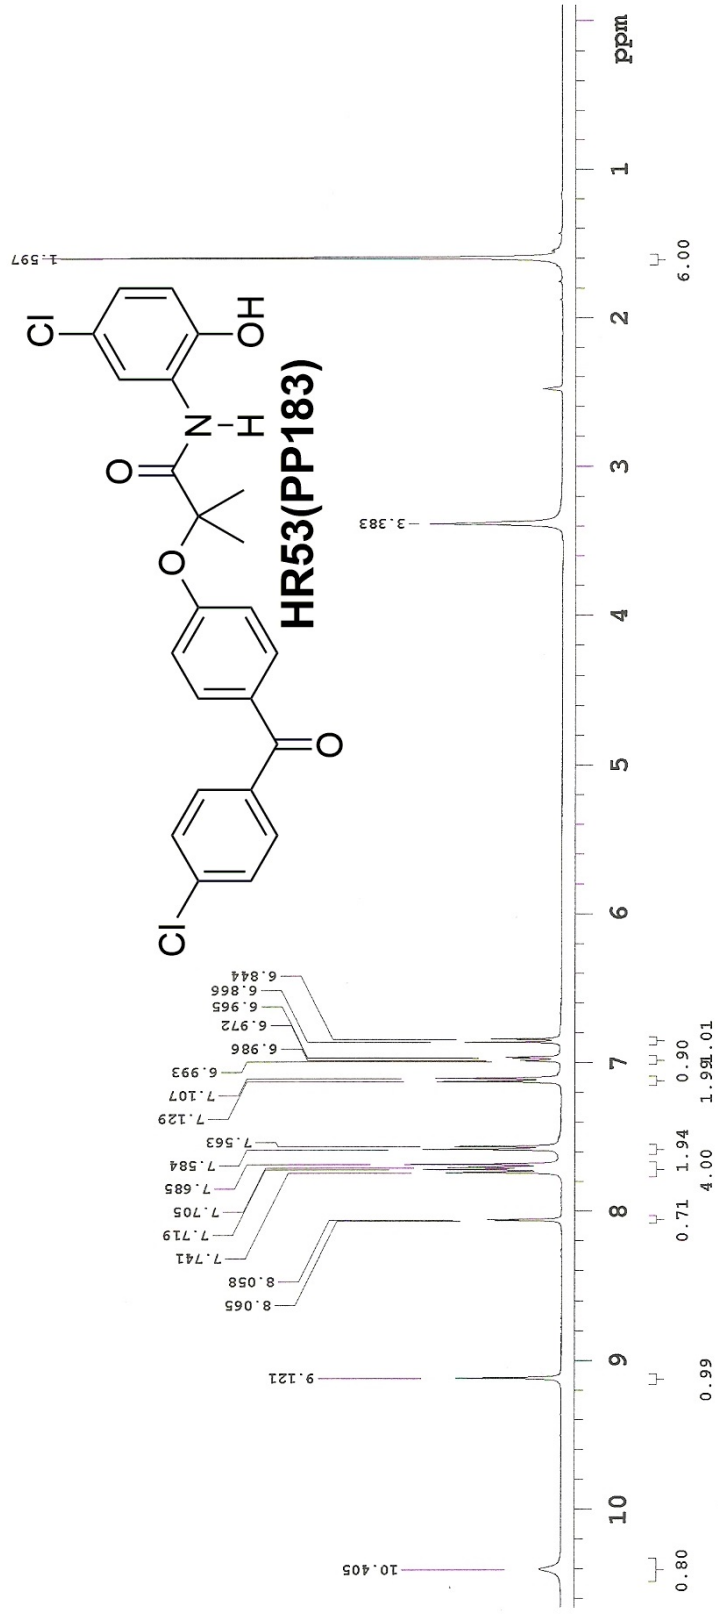

# <sup>1</sup>H-NMR(DMSO-d<sub>6</sub>) Varian Mercury 400 Plus

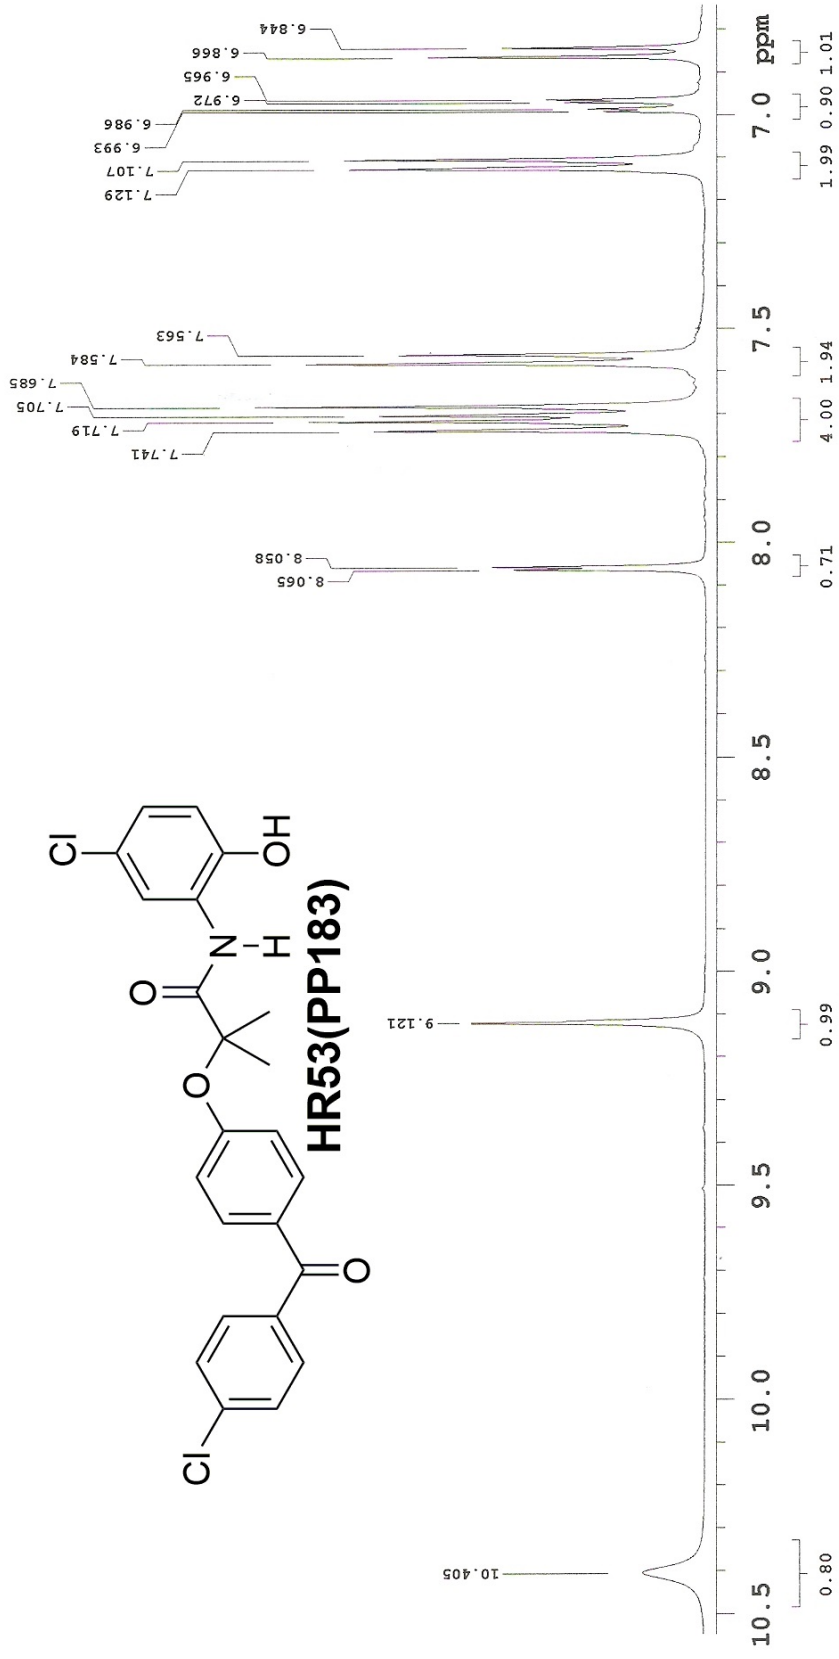

# <sup>13</sup>C-NMR(DMSO-d<sub>6</sub>) Varian Mercury 400 plus

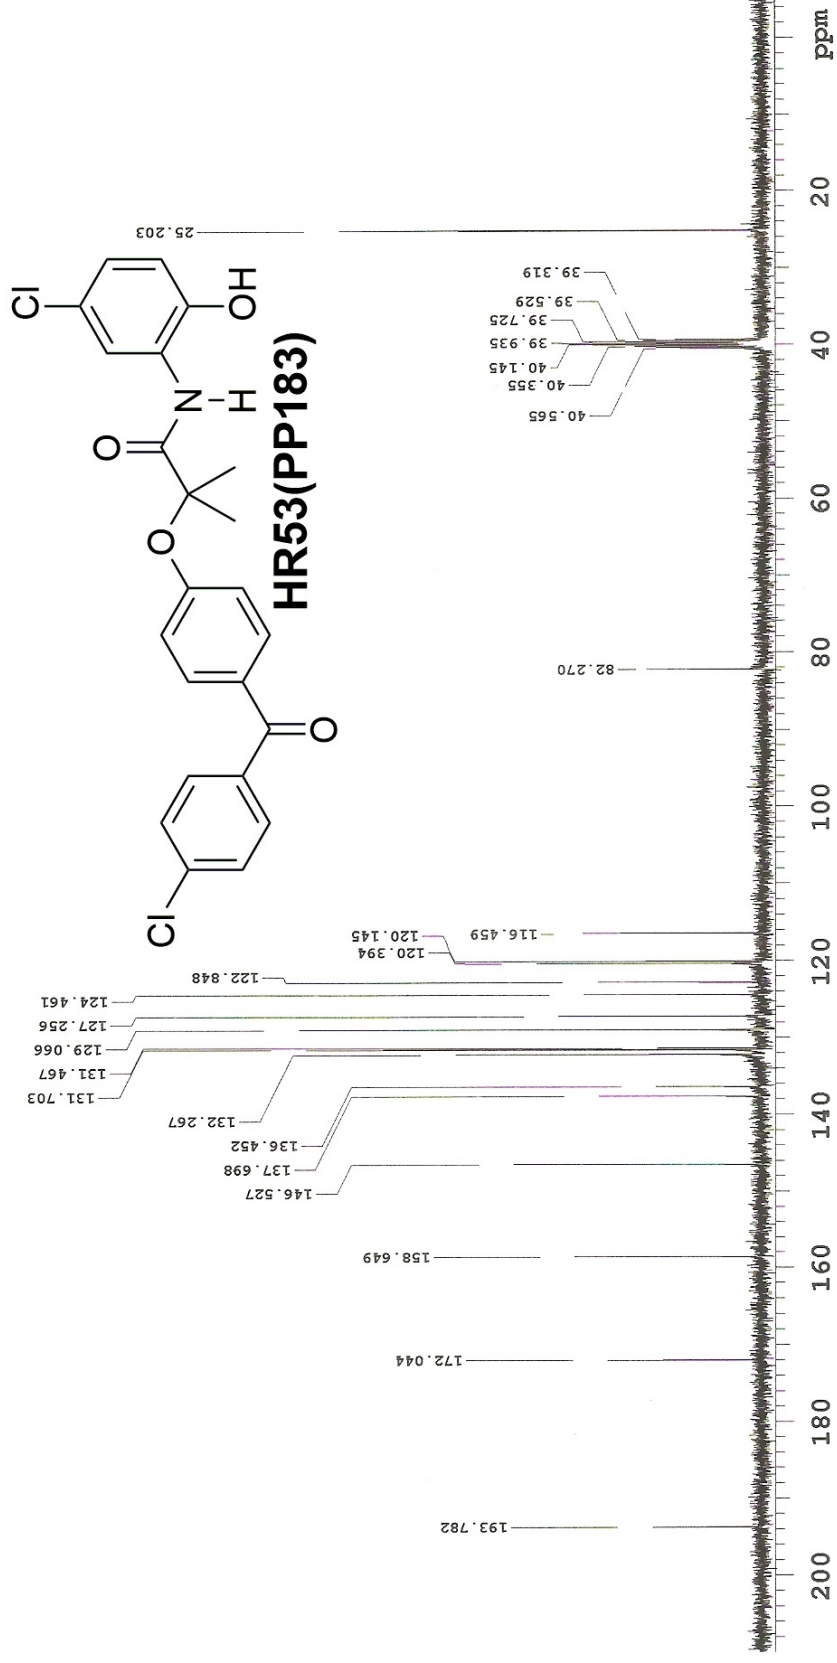

# <sup>1</sup>H-NMR(DMSO-d<sub>6</sub>) Varian Mercury 400 Plus

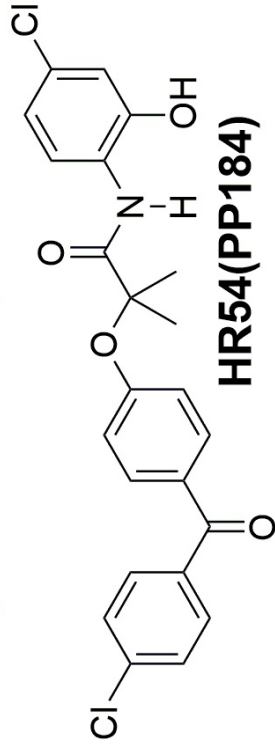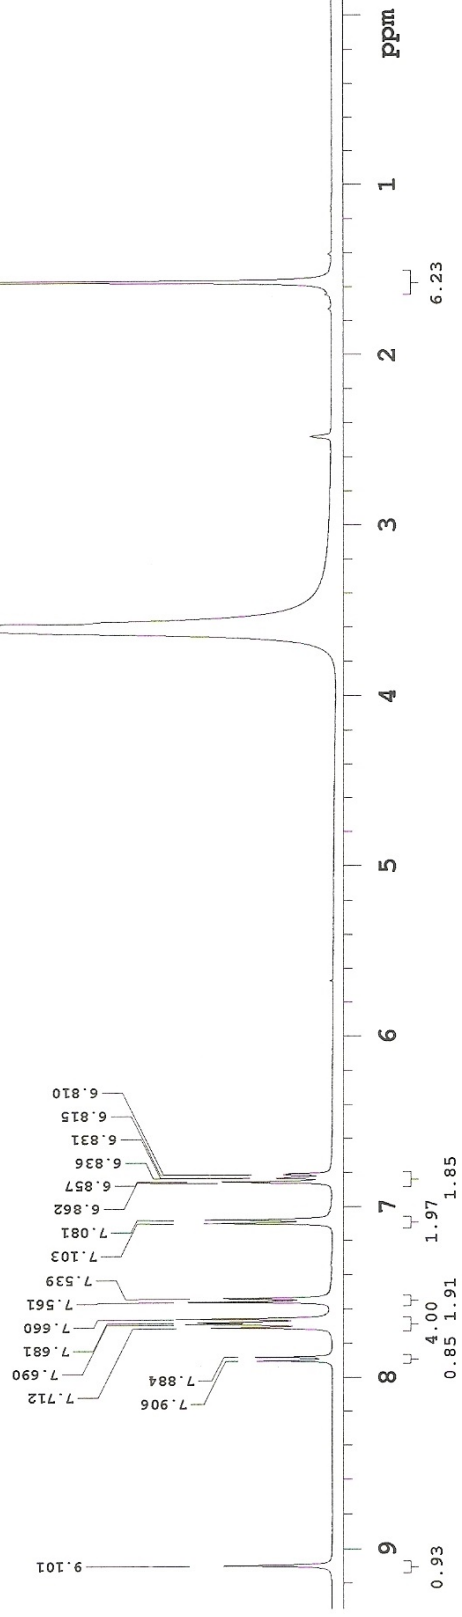

# <sup>1</sup>H-NMR(DMSO-d<sub>6</sub>) Varian Mercury 400 Plus

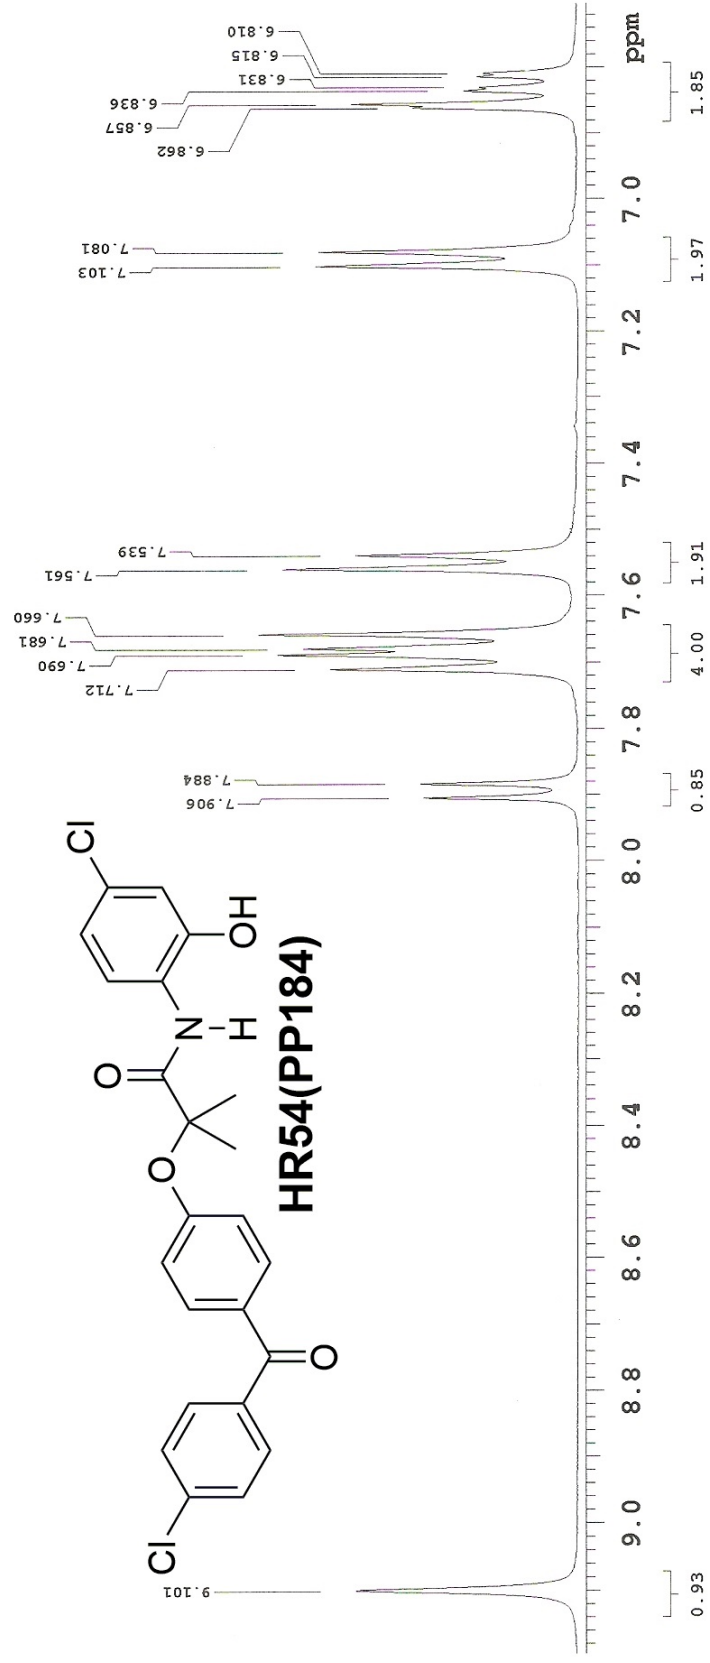

# <sup>13</sup>C-NMR(DMSO-d<sub>6</sub>) Varian Mercury 400 plus

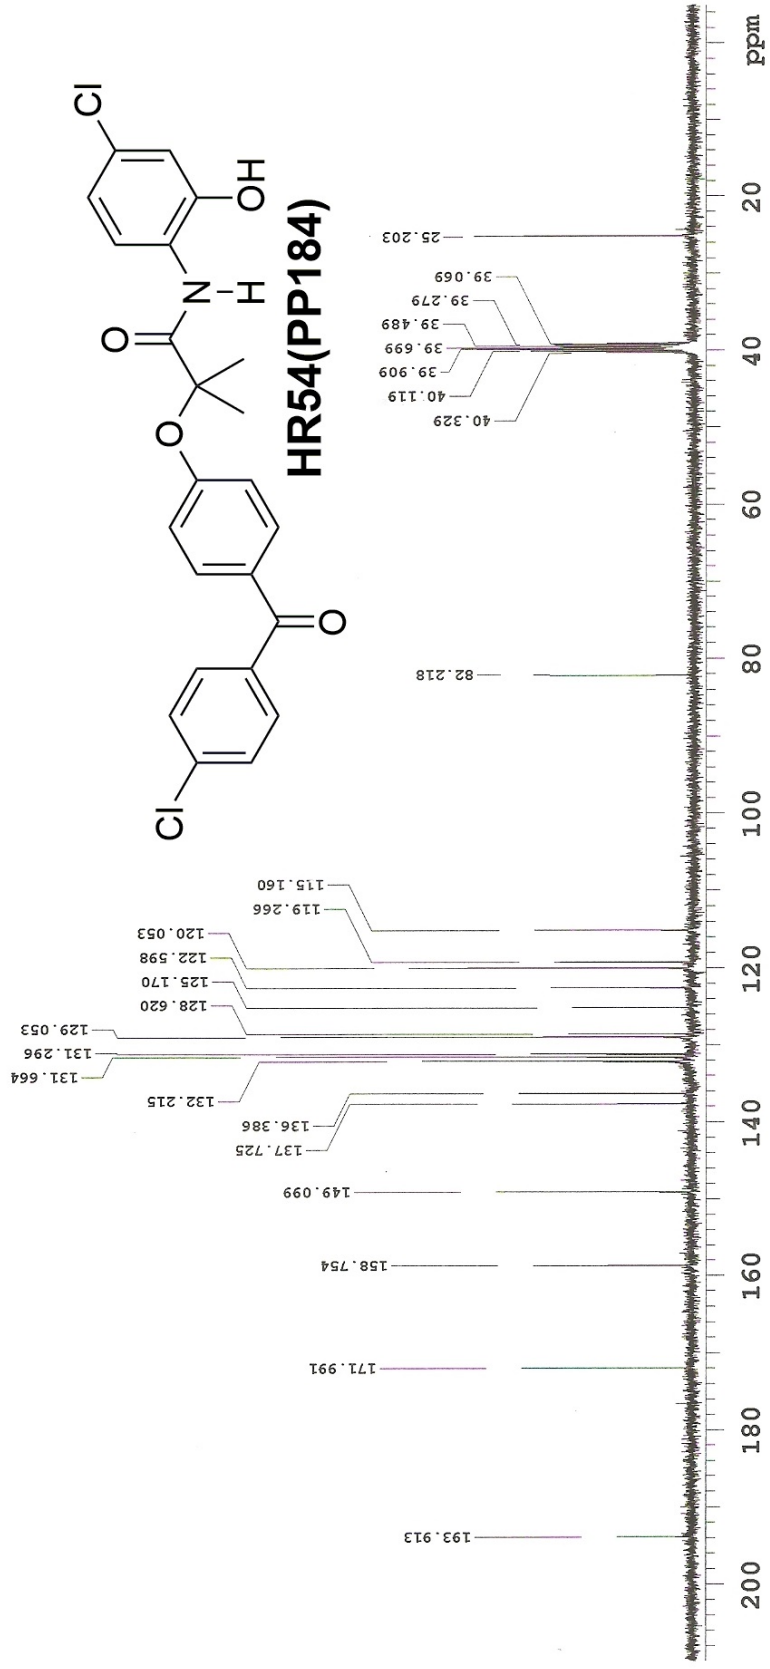



# <sup>1</sup>H-NMR(DMSO-d<sub>6</sub>) Varian Mercury 400 Plus

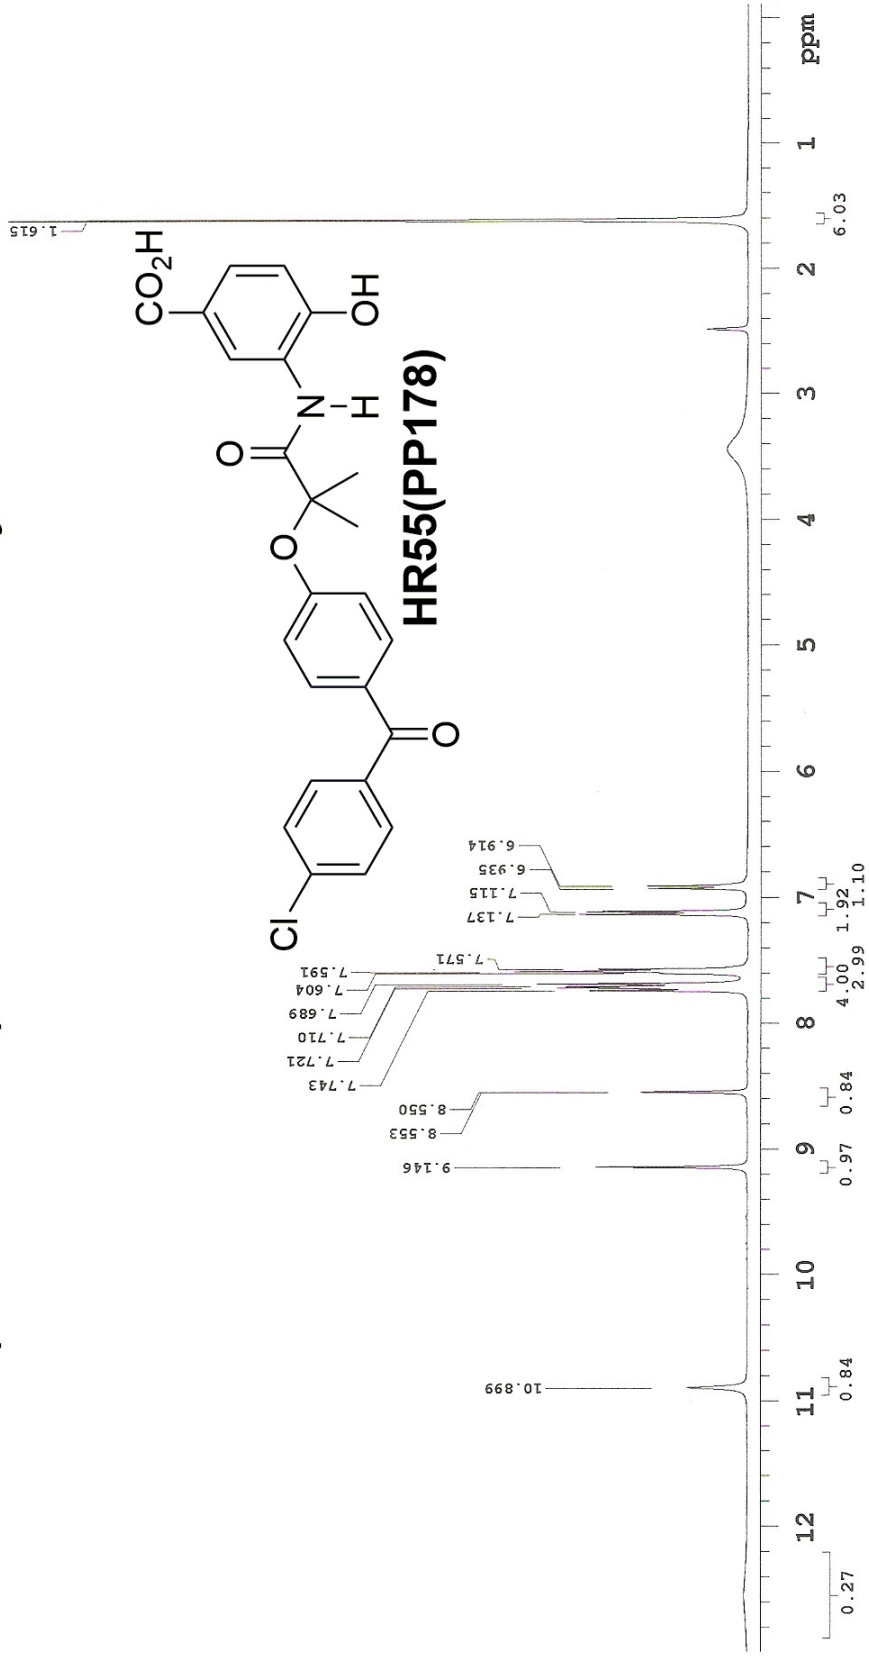

# <sup>1</sup>H-NMR(DMSO-d<sub>6</sub>) Varian Mercury 400 Plus

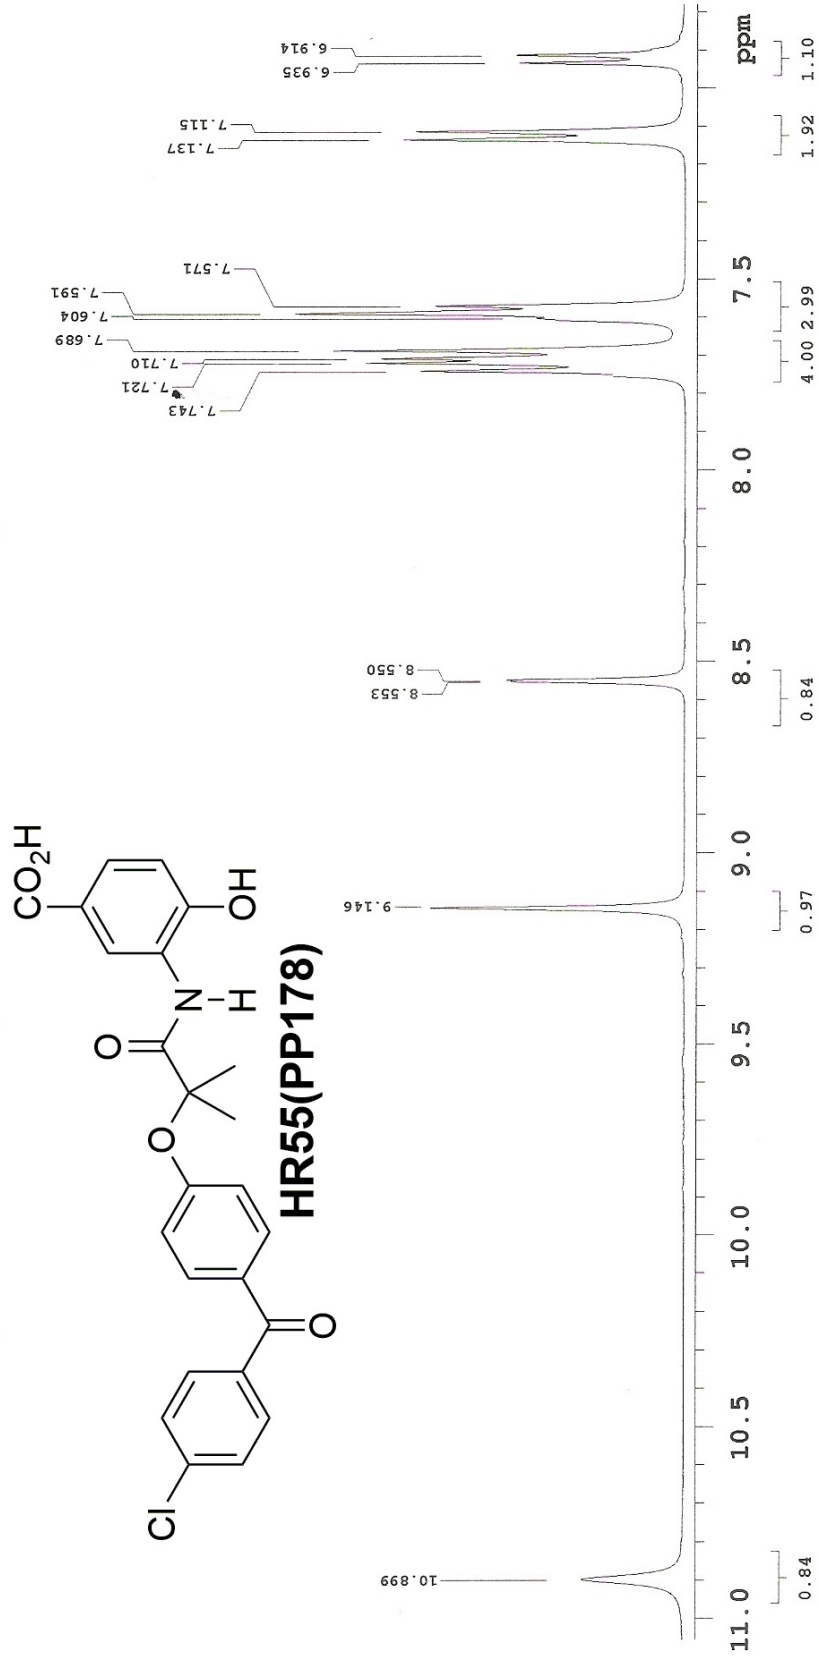

# <sup>13</sup>C-NMR(DMSO-d<sub>6</sub>) Varian Mercury 400 plus

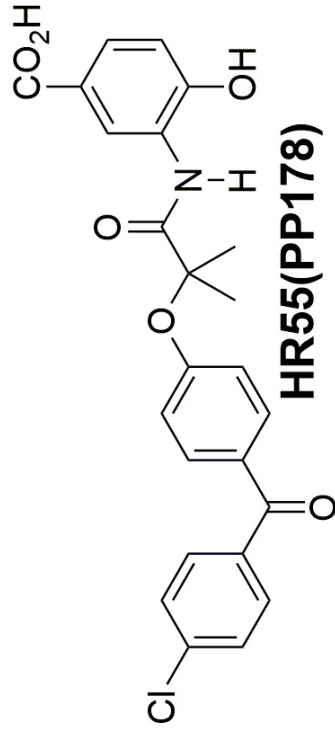

HR55(PP178)

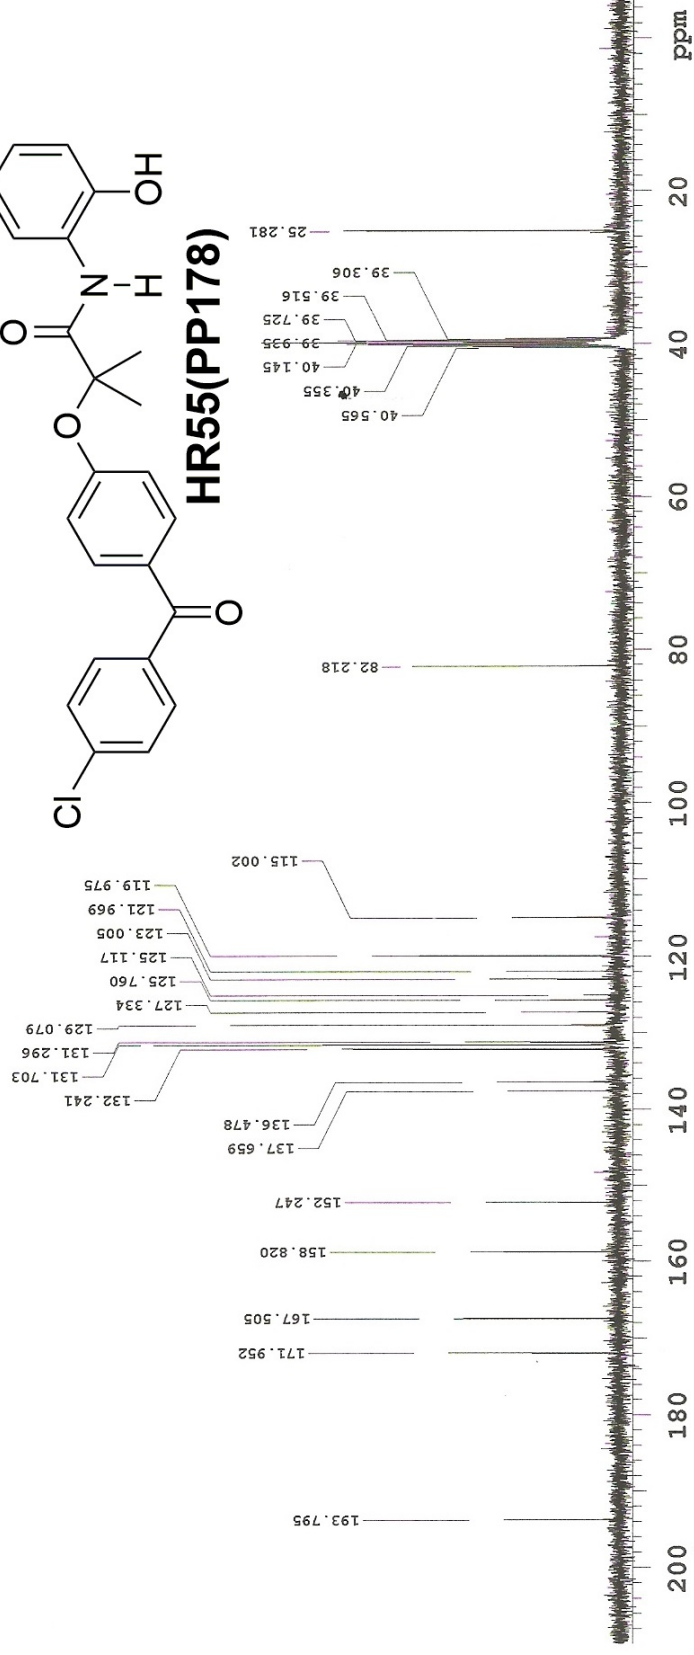

# $^1\text{H-NMR}(\text{CDCl}_3)$ Varian Mercury 400 Plus

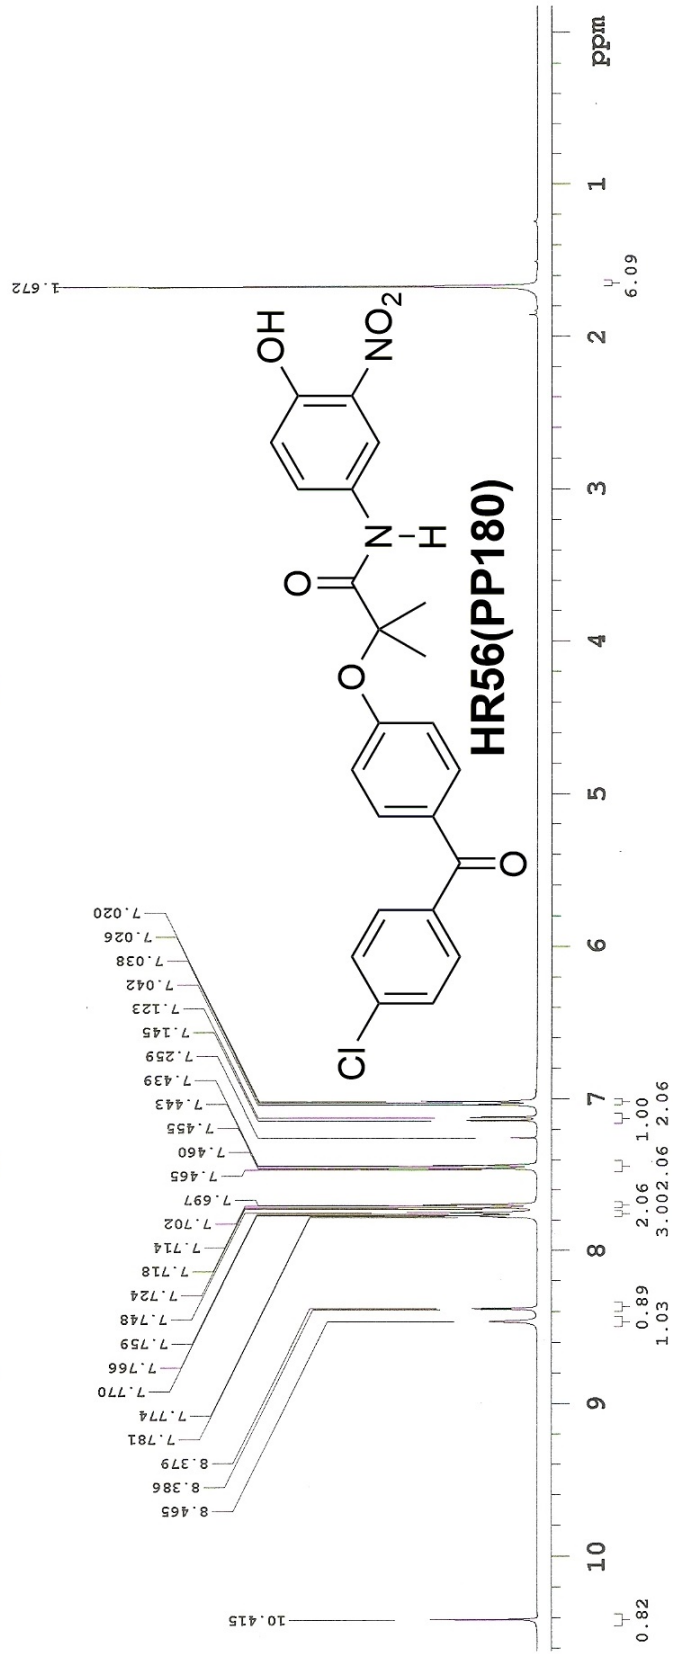

# <sup>1</sup>H-NMR(CDCl<sub>3</sub>) Varian Mercury 400 Plus

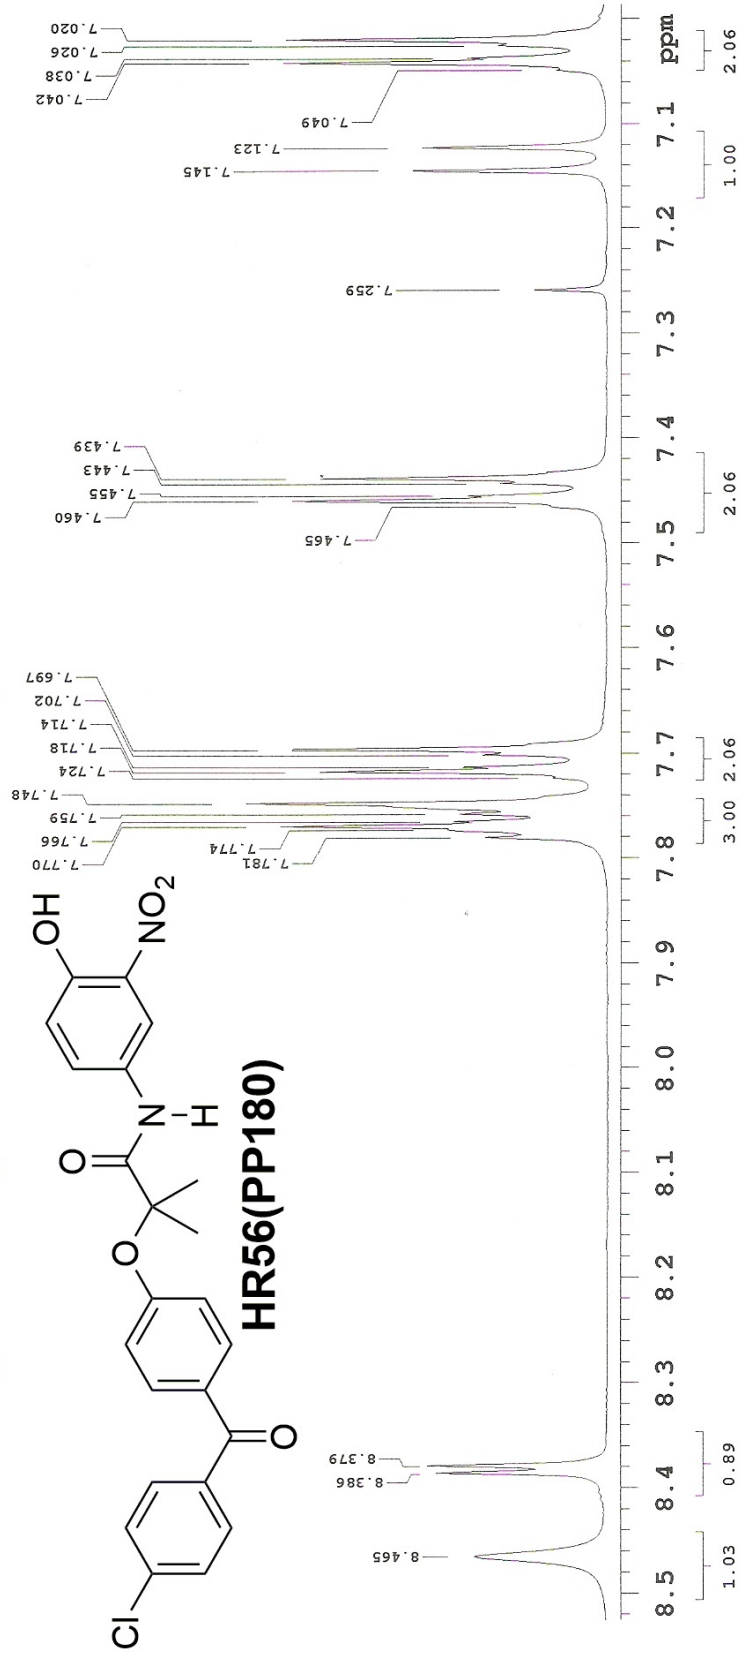

# $^{13}\text{C-NMR}(\text{CDCl}_3)$ Varian Mercury 400 Plus

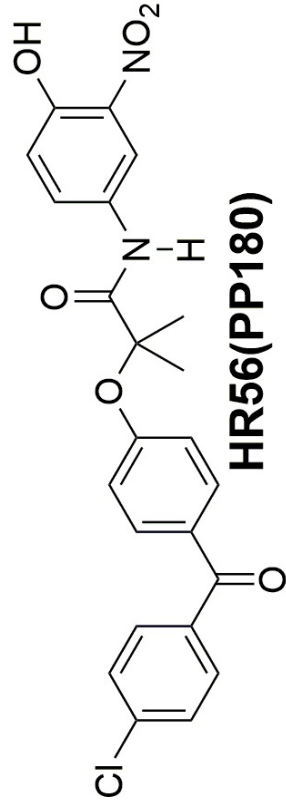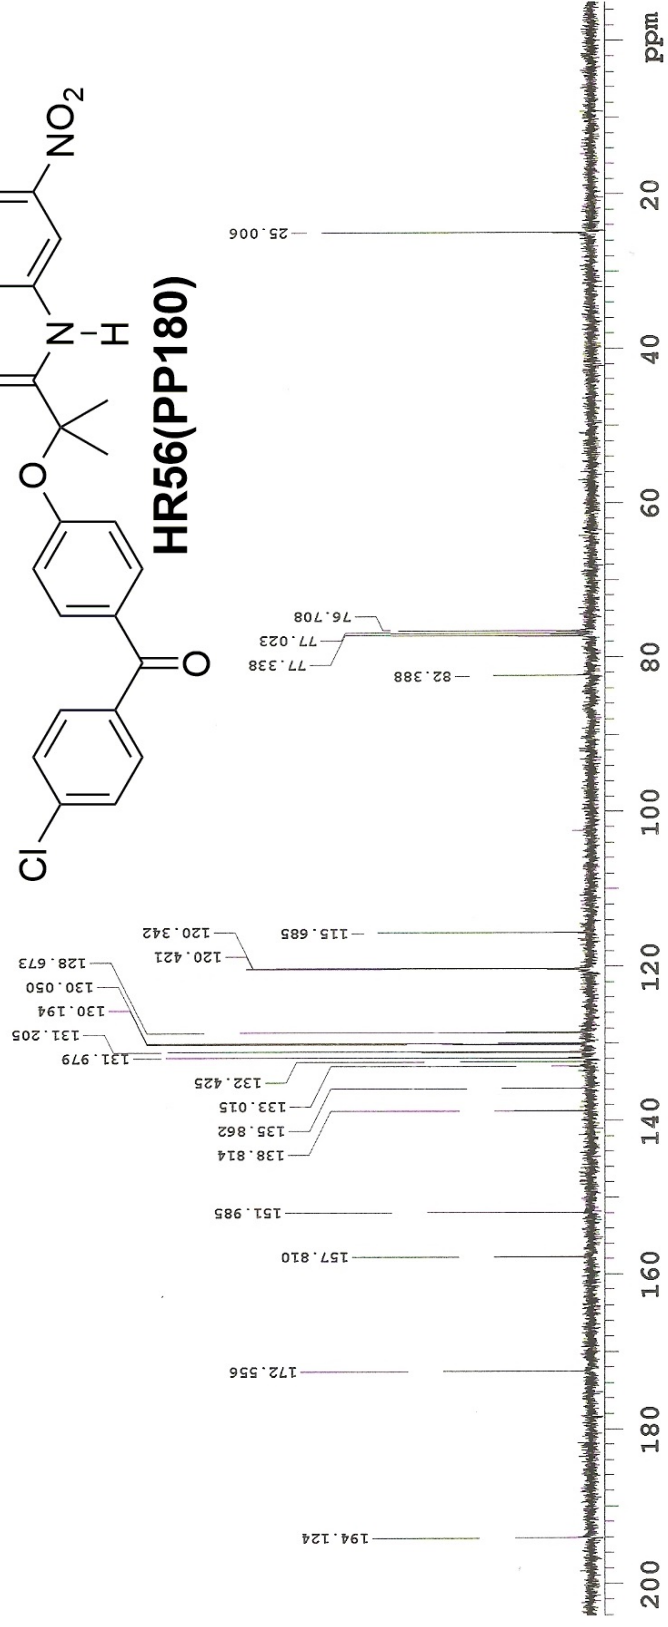

# <sup>1</sup>H-NMR (CDCl<sub>3</sub>) Varian Mercury 400 Plus

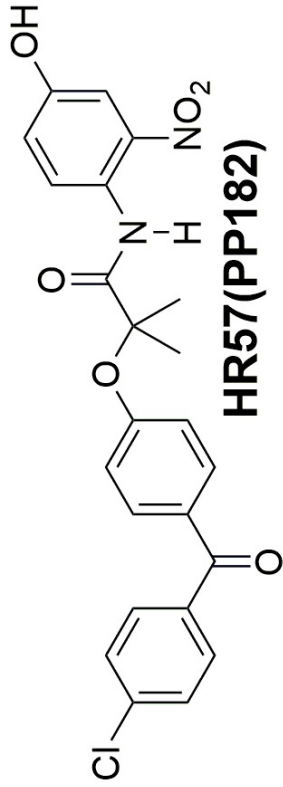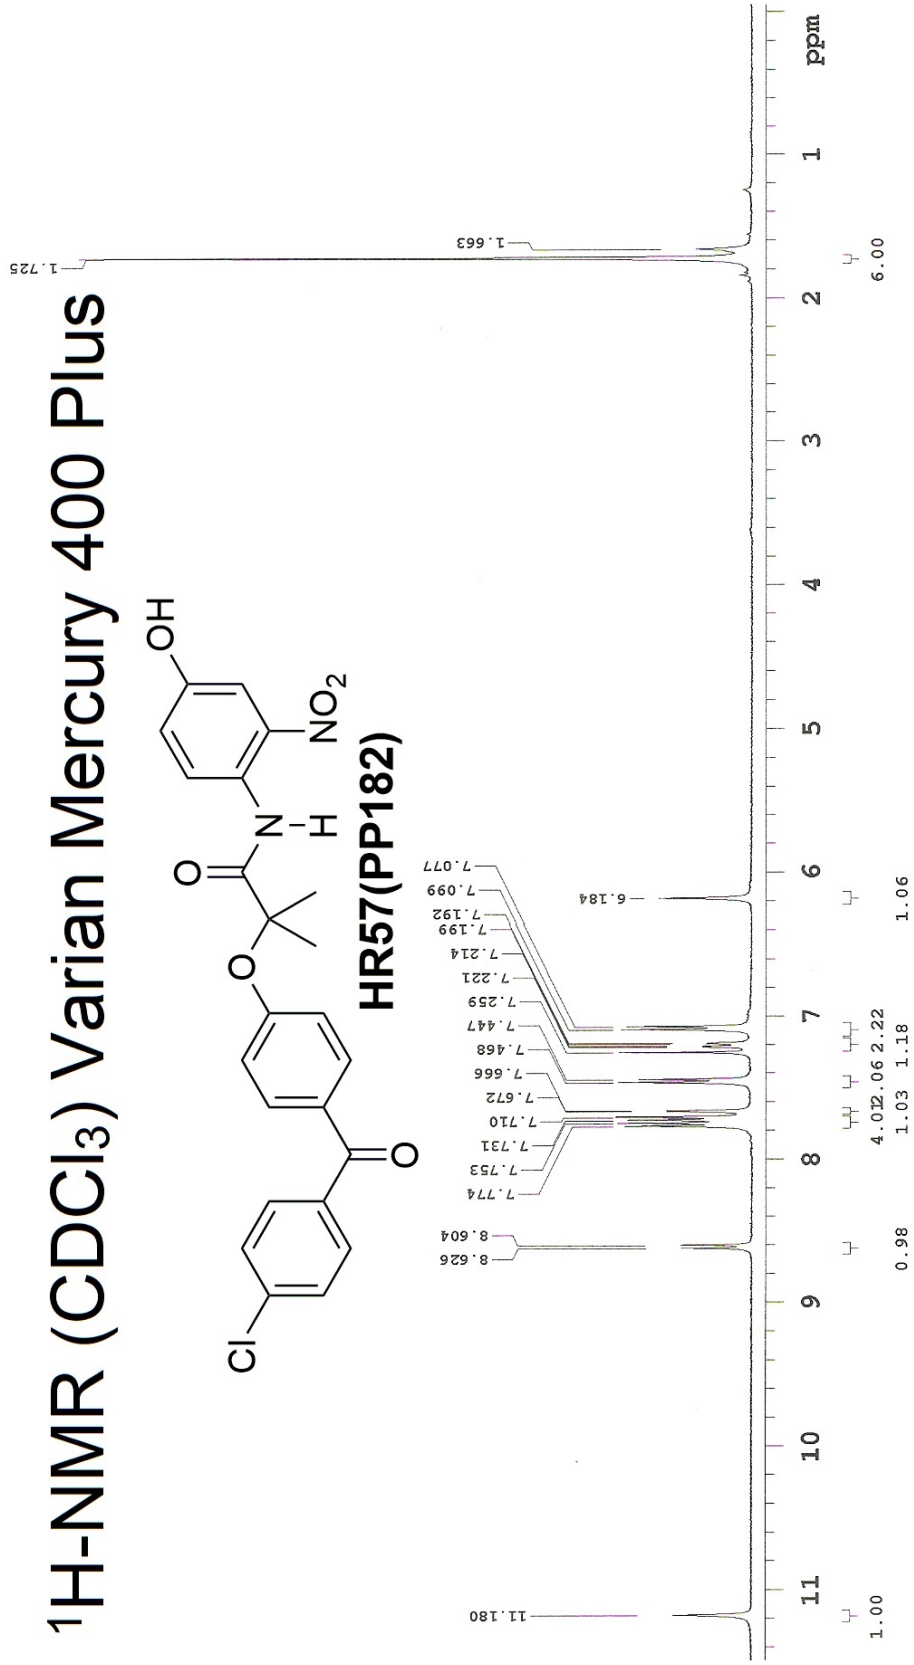

# <sup>1</sup>H-NMR (CDCl<sub>3</sub>) Varian Mercury 400 Plus

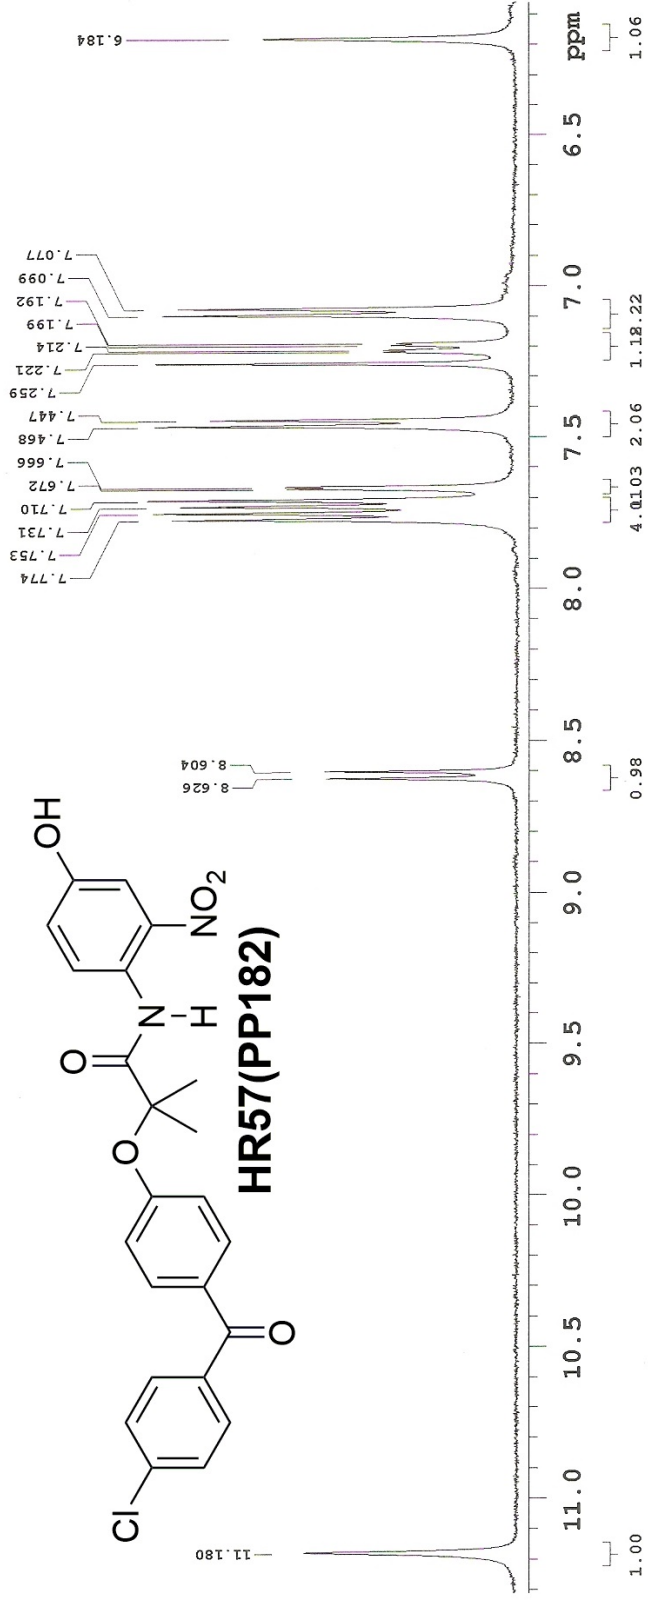



# $^{13}\text{C}$ -NMR( $\text{CDCl}_3$ ) Varian Mercury 400 Plus

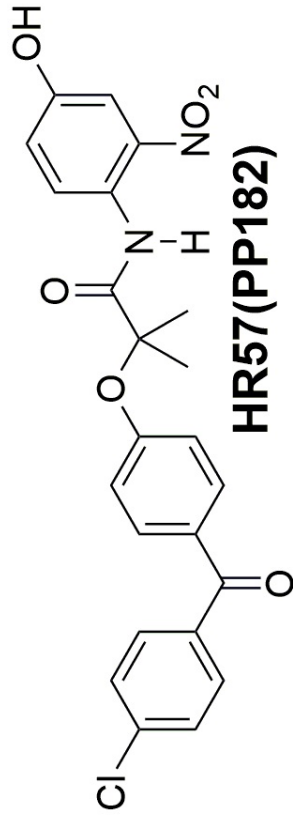

HR57(PP182)

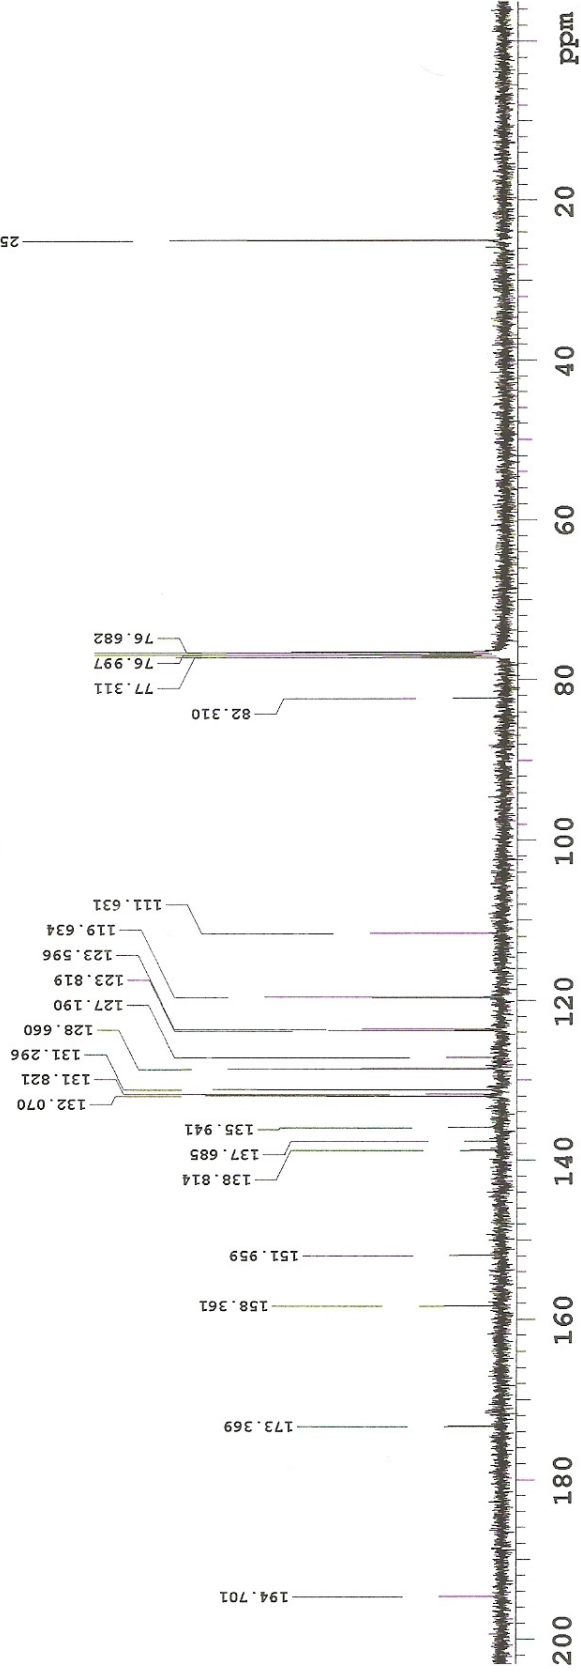

# <sup>1</sup>H-NMR(DMSO-d<sub>6</sub>) Varian Mercury 400 Plus

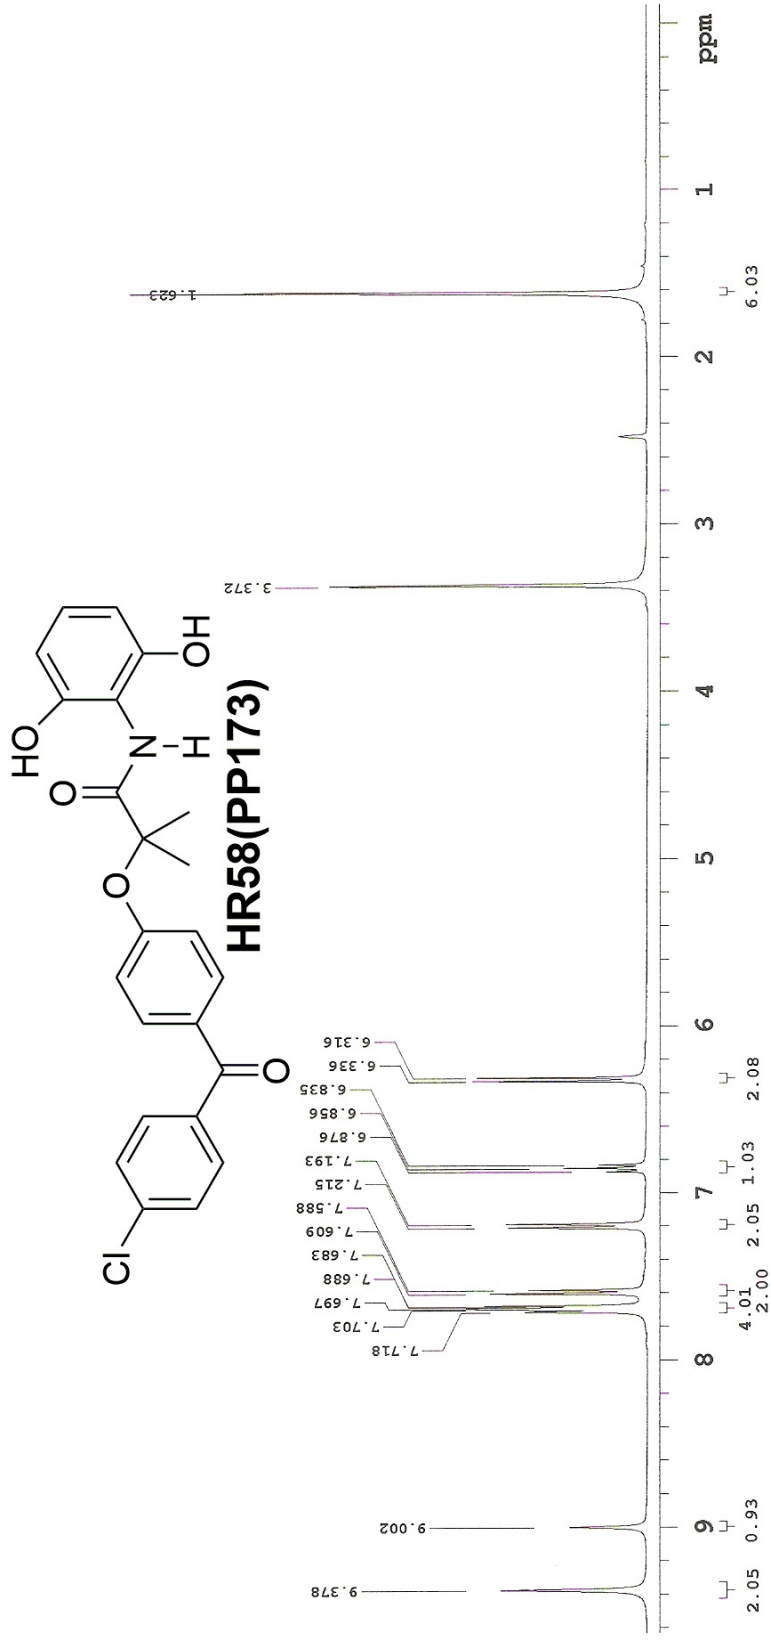

# <sup>1</sup>H-NMR(DMSO-d<sub>6</sub>) Varian Mercury 400 Plus

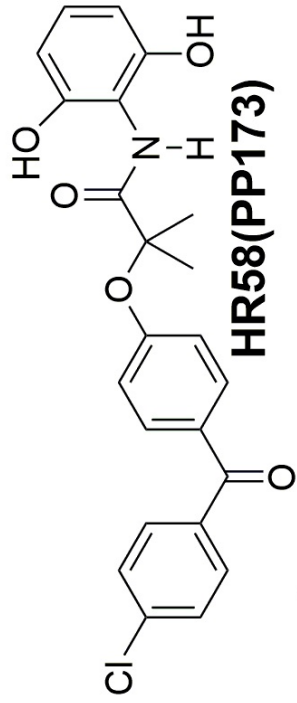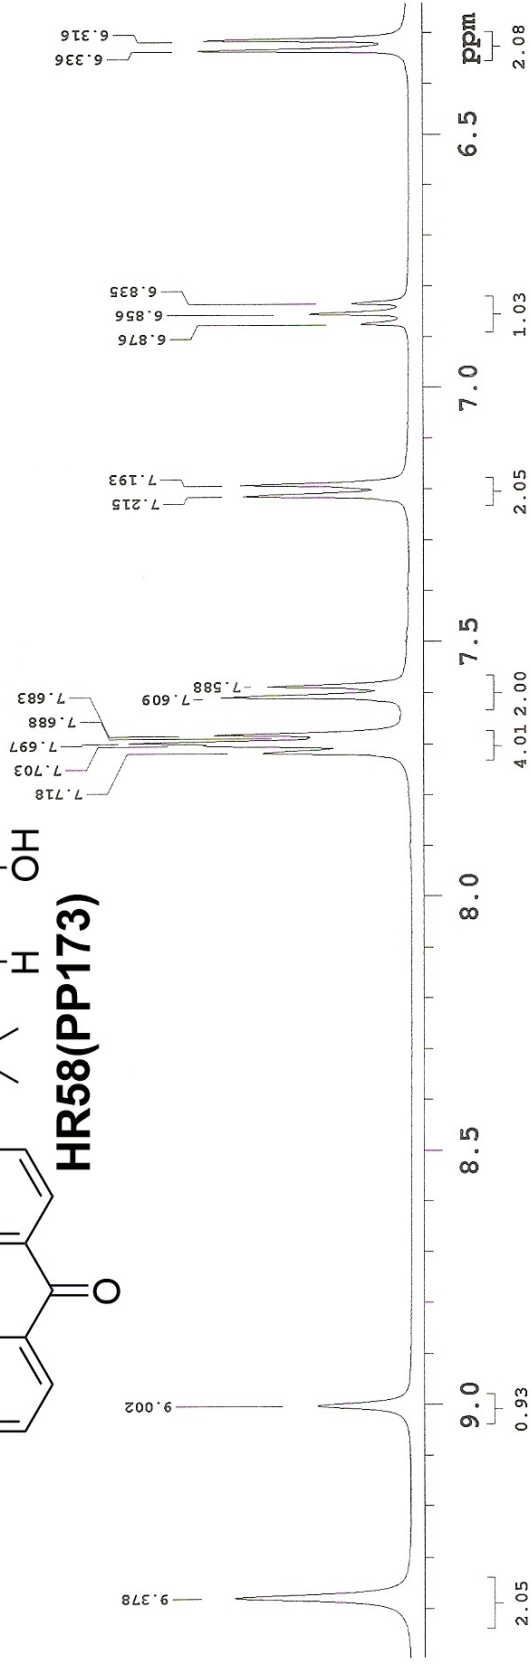

# <sup>13</sup>C-NMR(DMSO-d<sub>6</sub>) Varian Mercury 400 plus

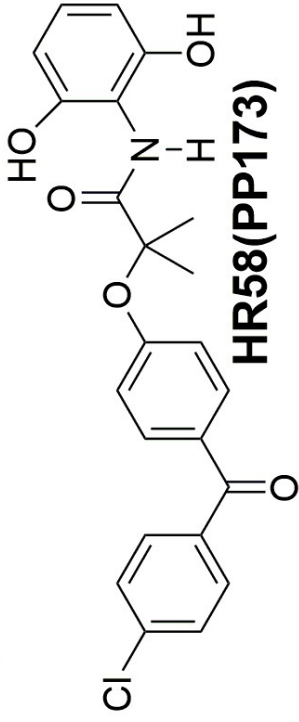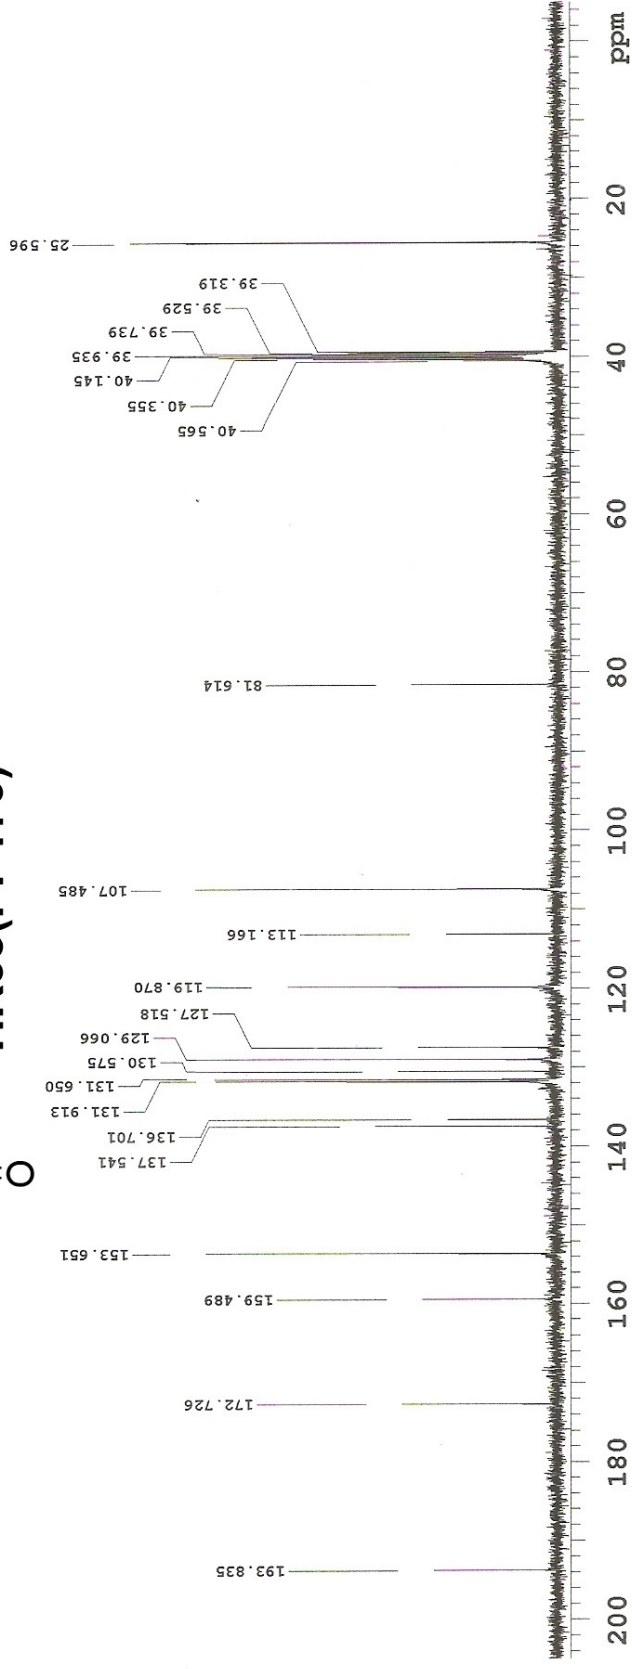



# $^1\text{H-NMR}(\text{DMSO-}d_6)$ Varian Mercury 400 Plus

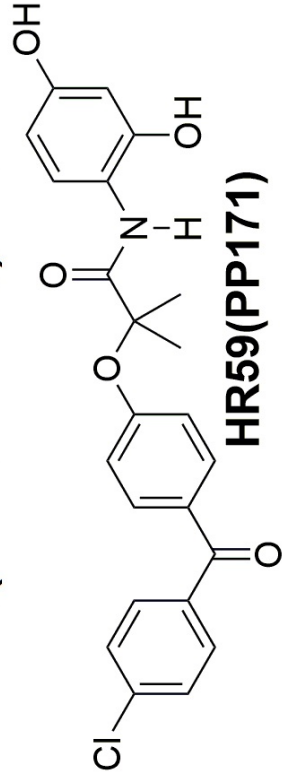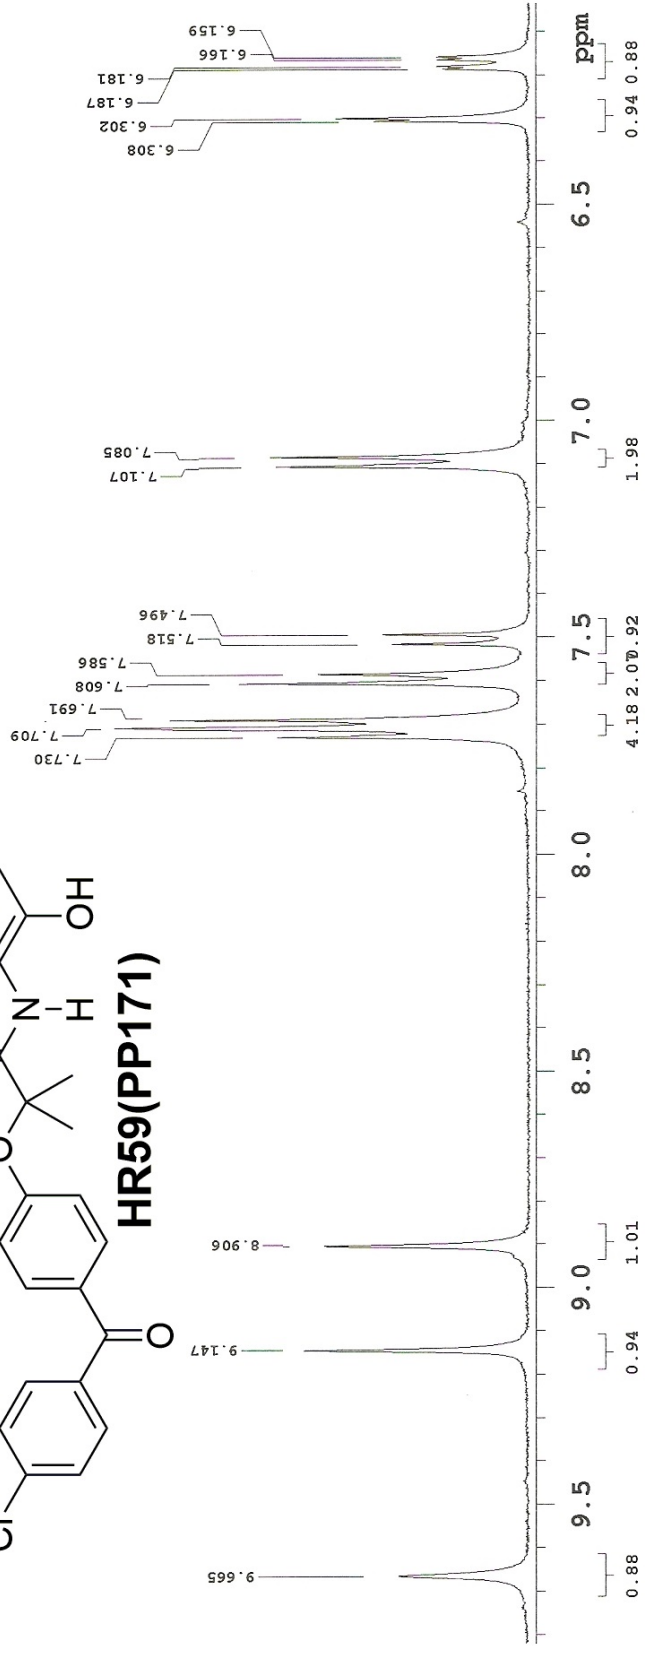

# $^1\text{H-NMR}(\text{CDCl}_3)$ Varian Mercury 400 Plus

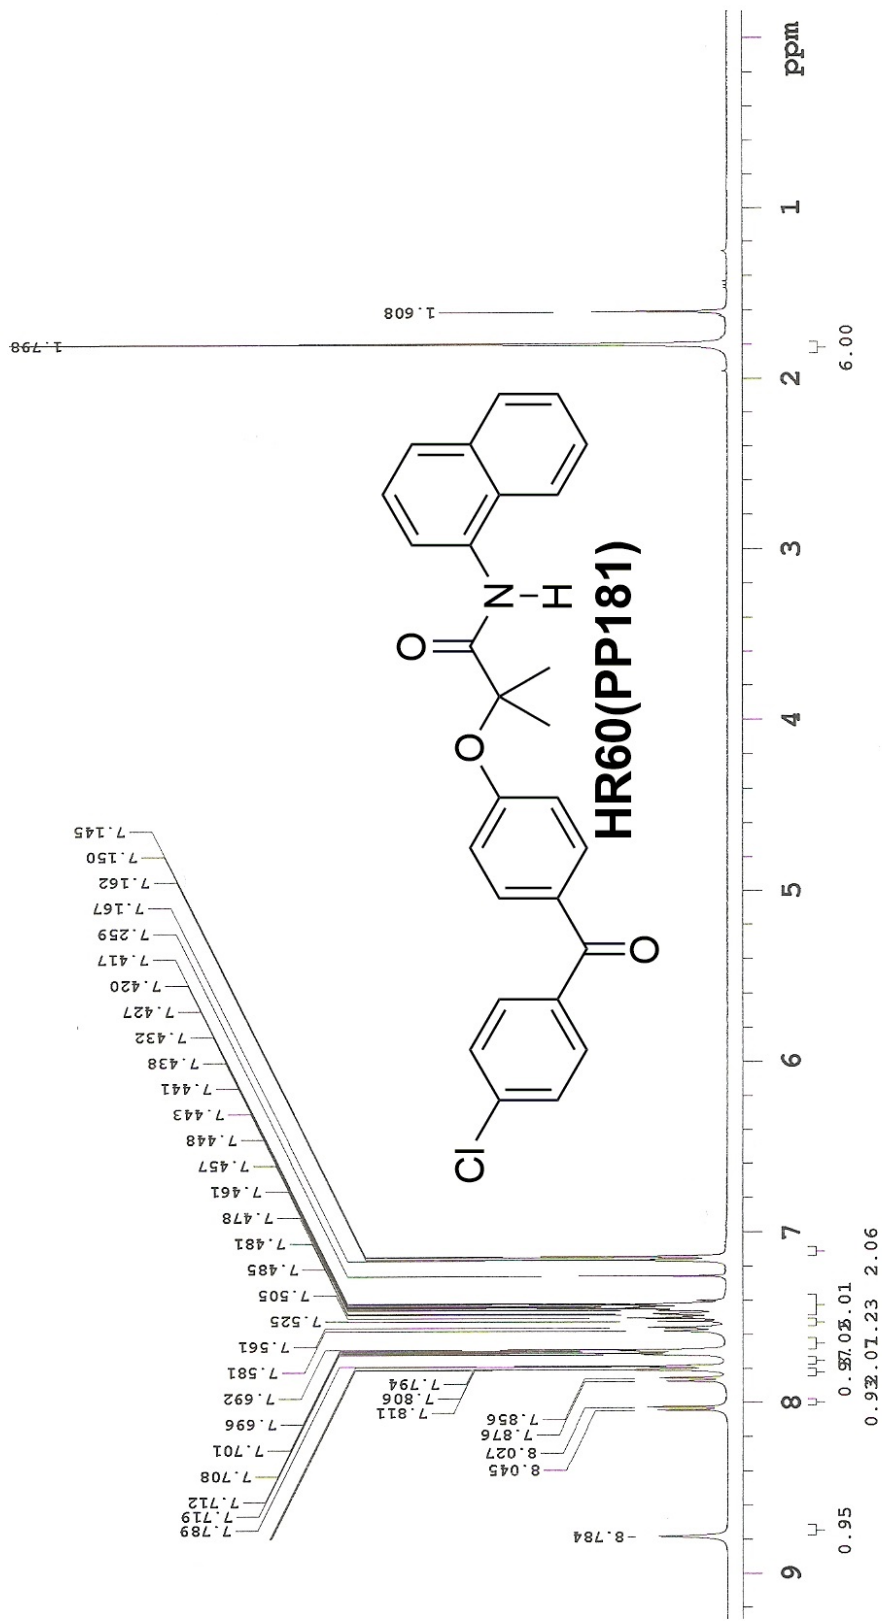





# $^{13}\text{C}$ -NMR( $\text{CDCl}_3$ ) Varian Mercury 400 Plus

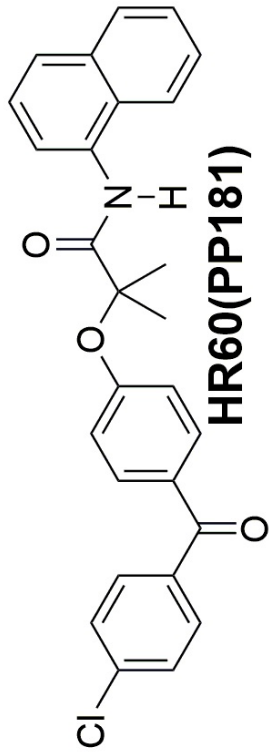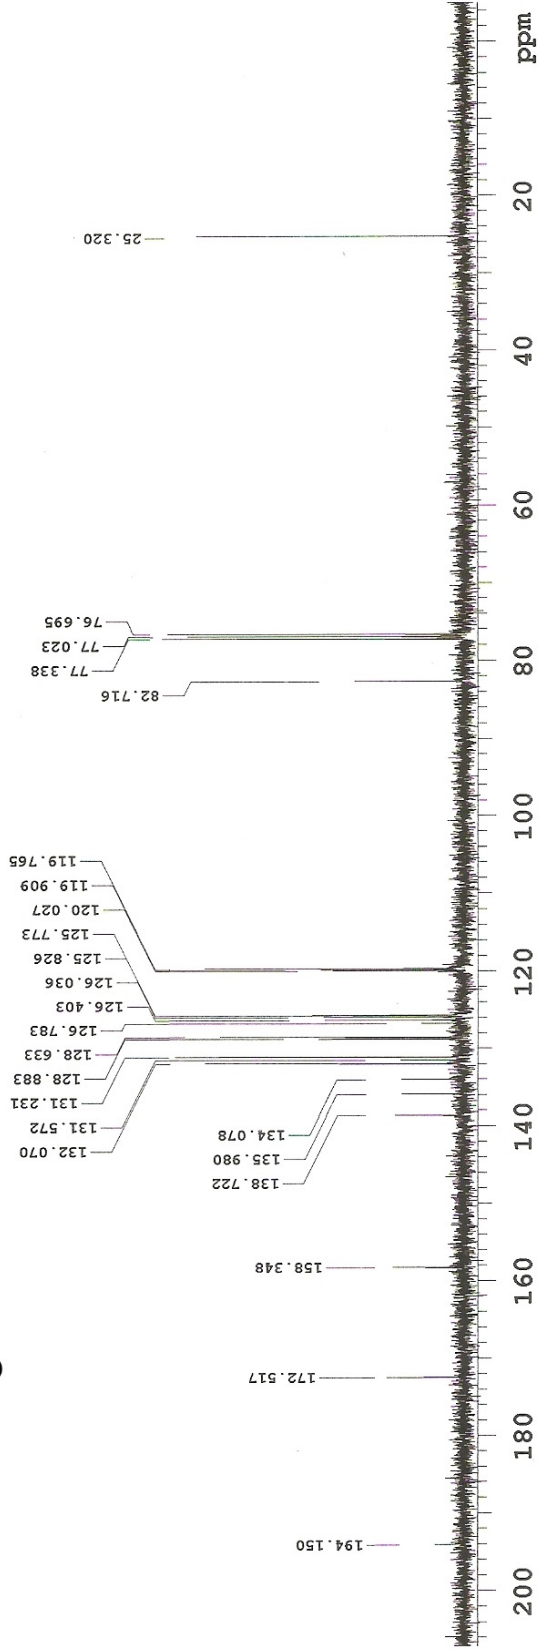

# $^1\text{H-NMR}$ ( $\text{DMSO-d}_6$ ) Varian Mercury 400 Plus

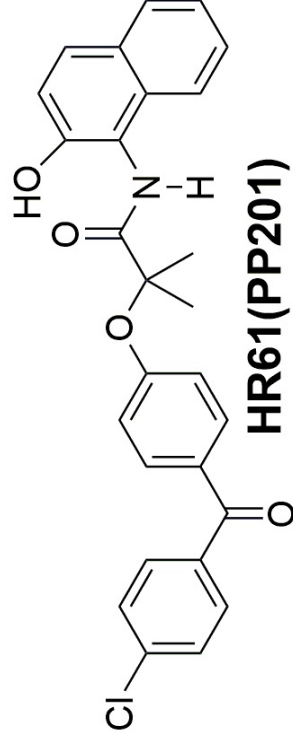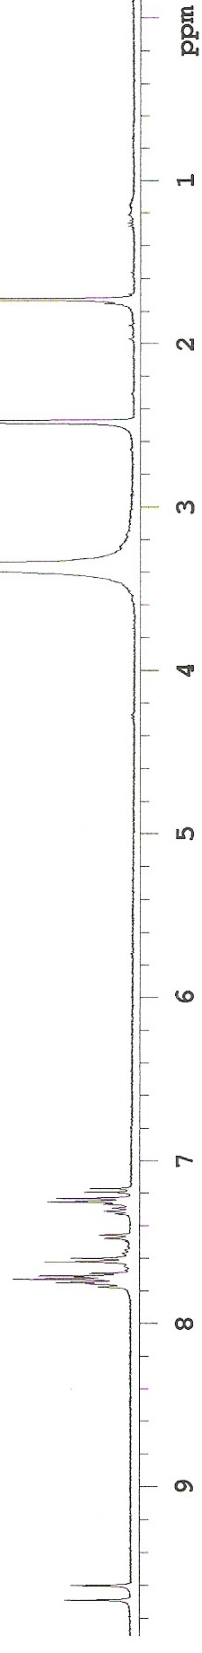

# <sup>13</sup>C-NMR(DMSO-d<sub>6</sub>) Varian Mercury 400 plus

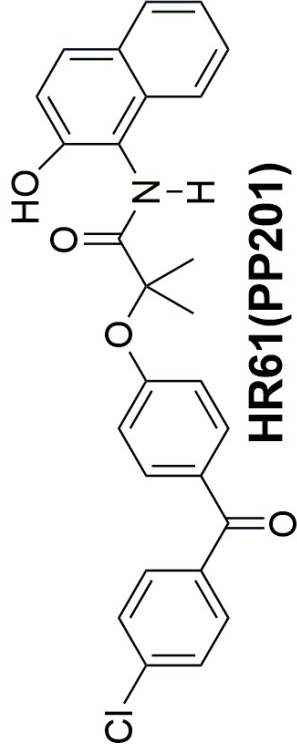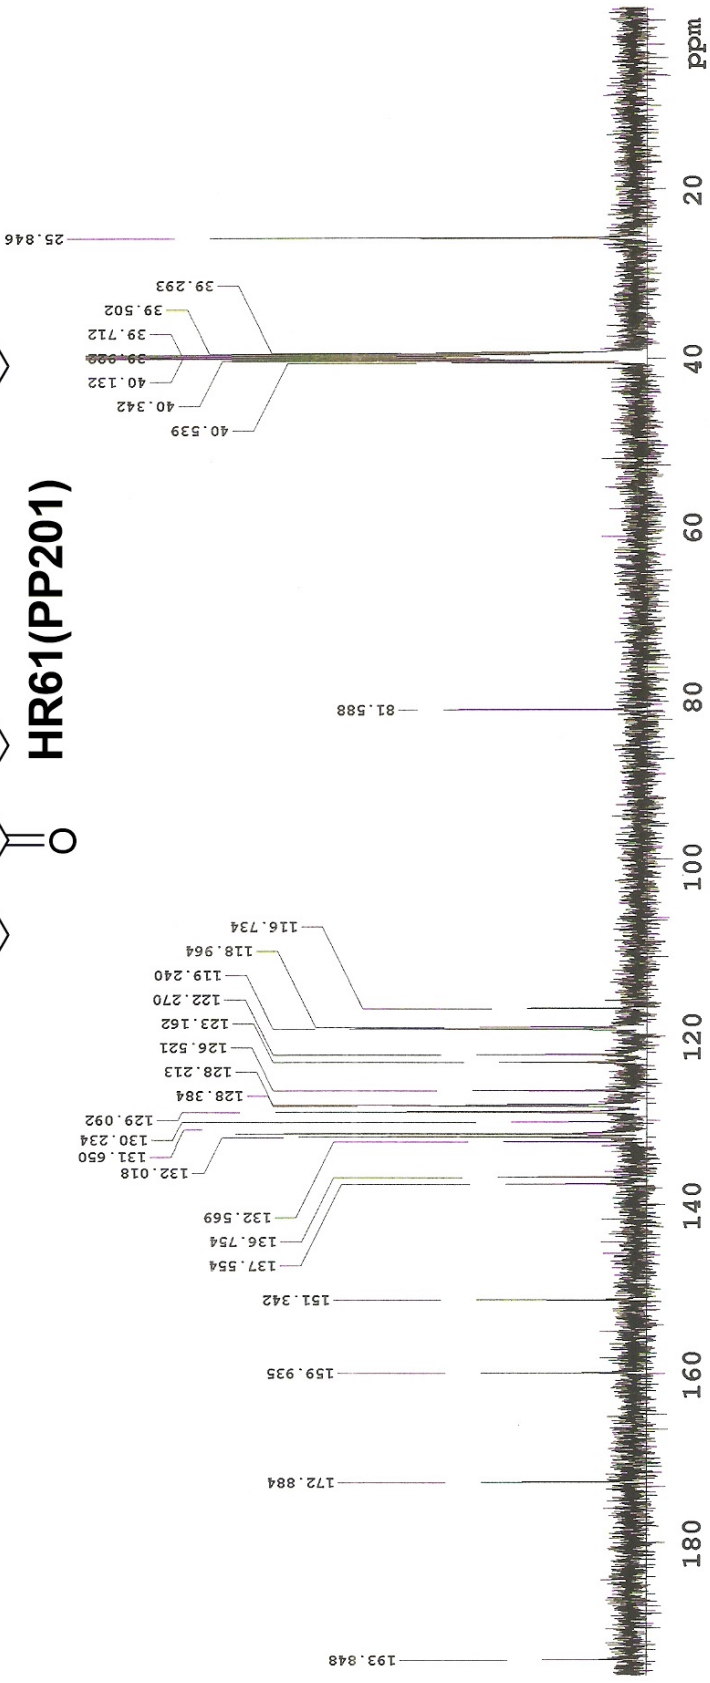

# <sup>1</sup>H-NMR(DMSO-d<sub>6</sub>) Varian Mercury 400 Plus

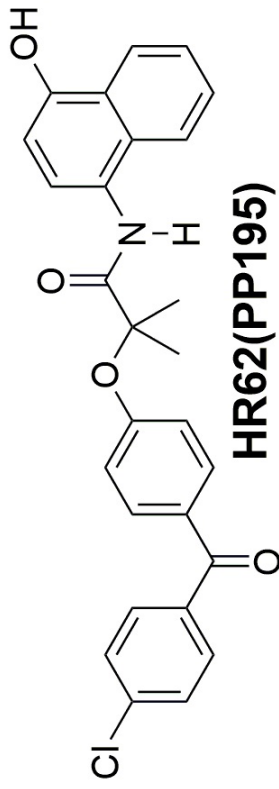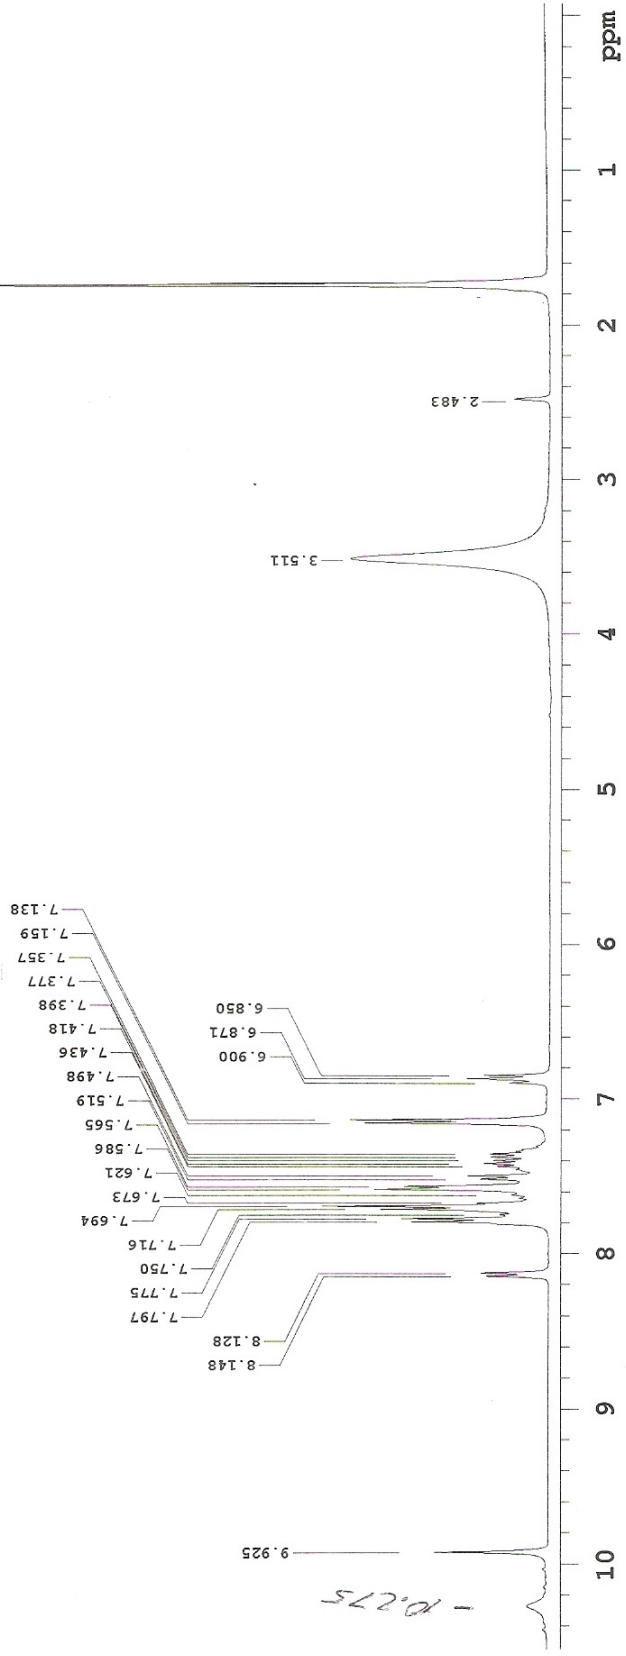

# <sup>13</sup>C-NMR(DMSO-d<sub>6</sub>) Varian Mercury 400 plus

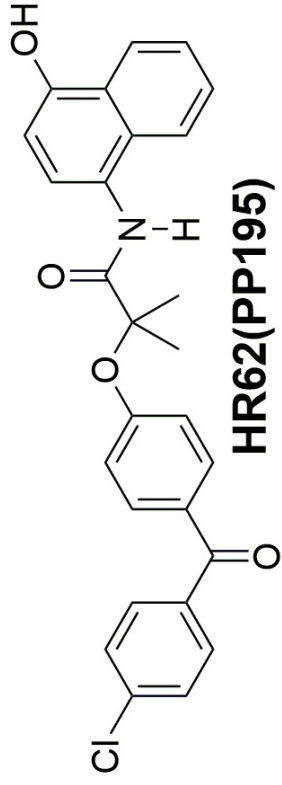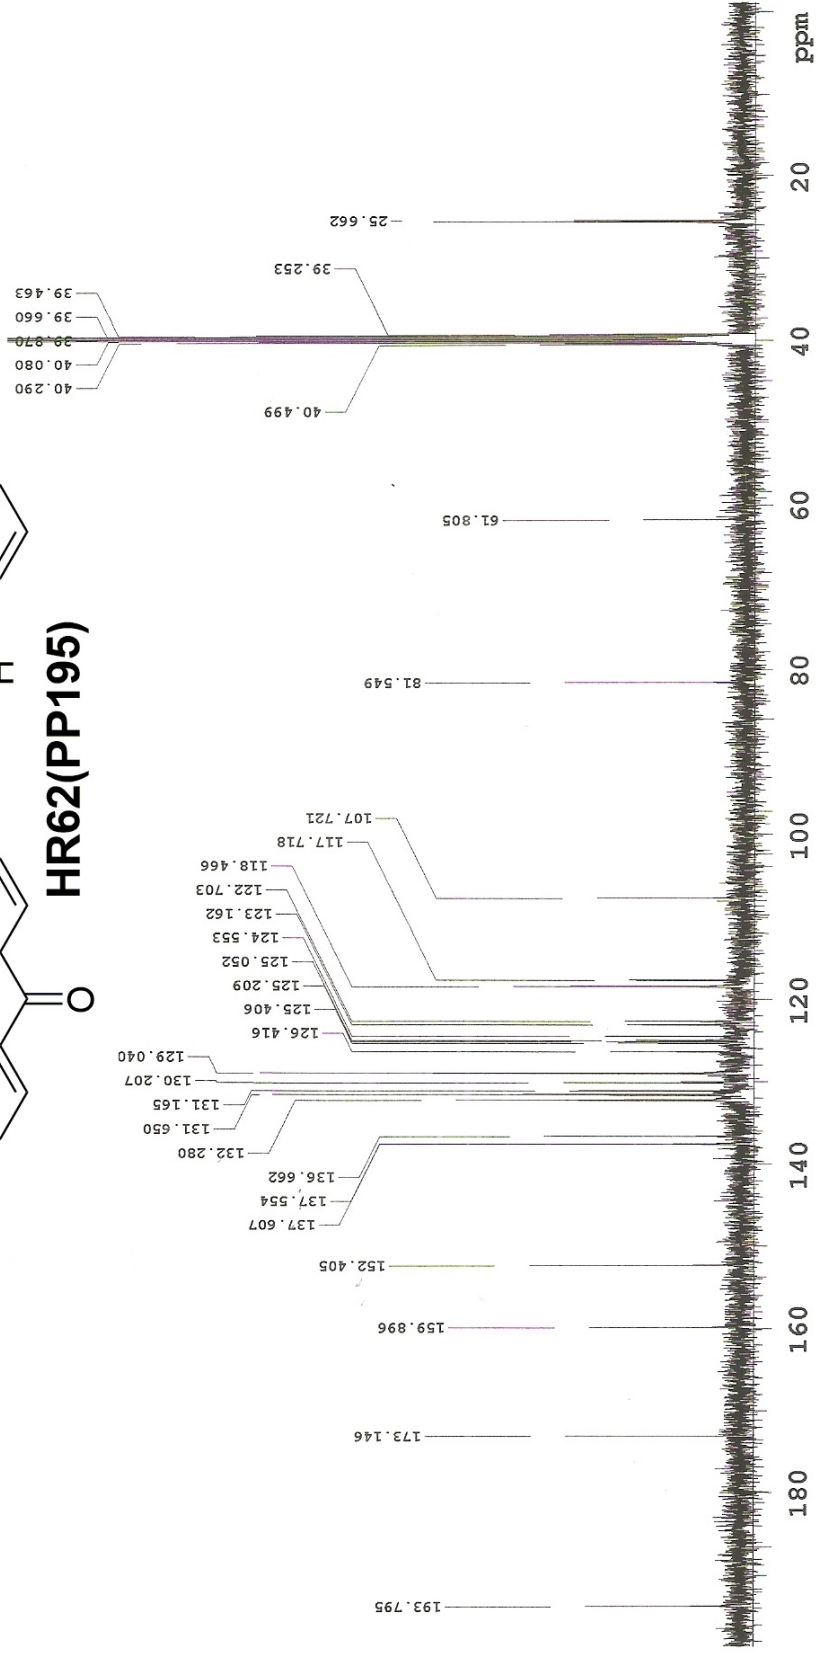

# <sup>1</sup>H-NMR(DMSO-d<sub>6</sub>) Varian Mercury 400 Plus

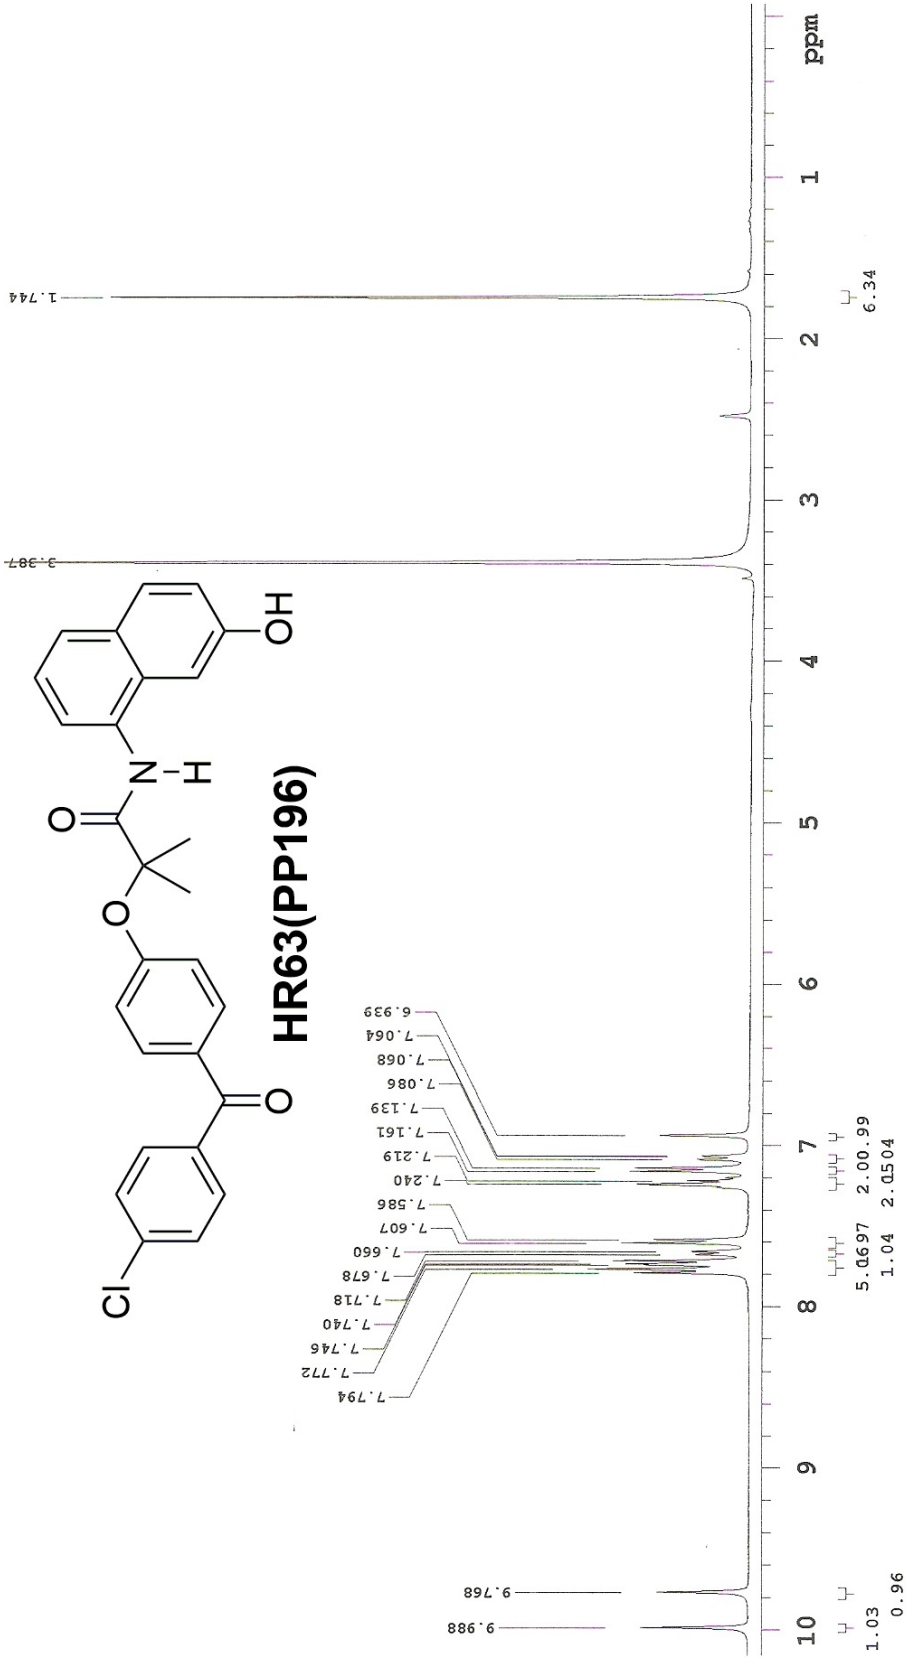

# <sup>1</sup>H-NMR(DMSO-d<sub>6</sub>) Varian Mercury 400 Plus

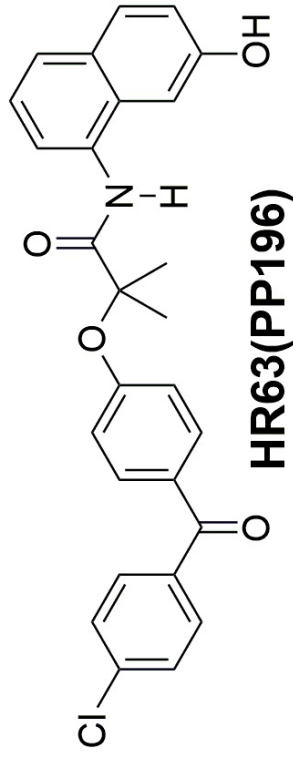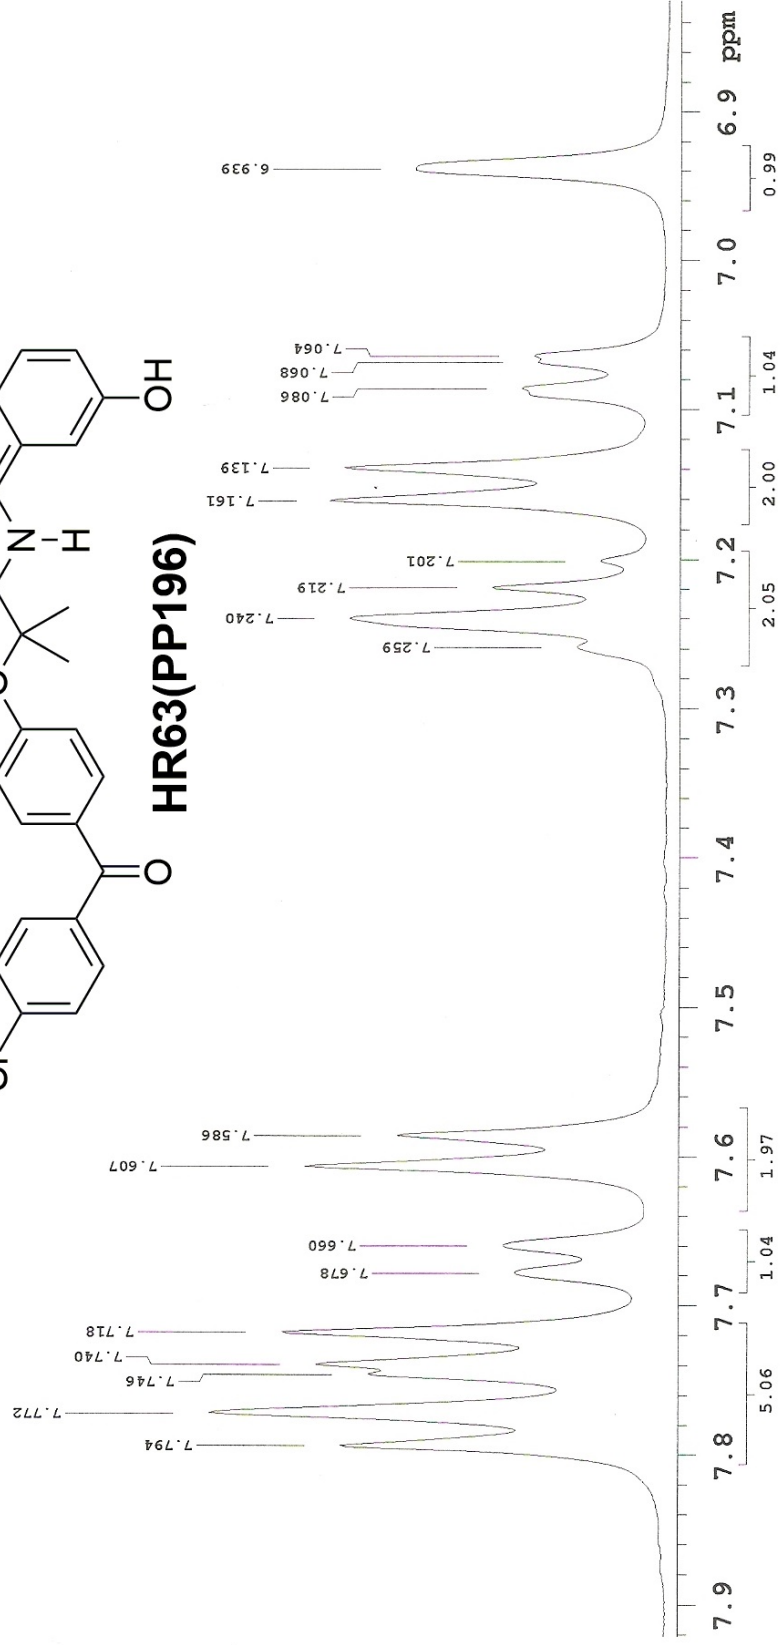



# <sup>13</sup>C-NMR(DMSO-d<sub>6</sub>) Varian Mercury 400 plus

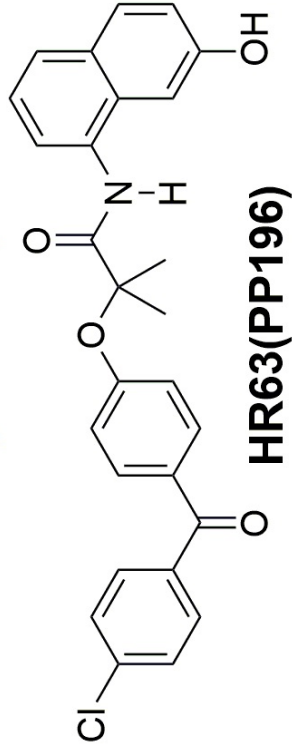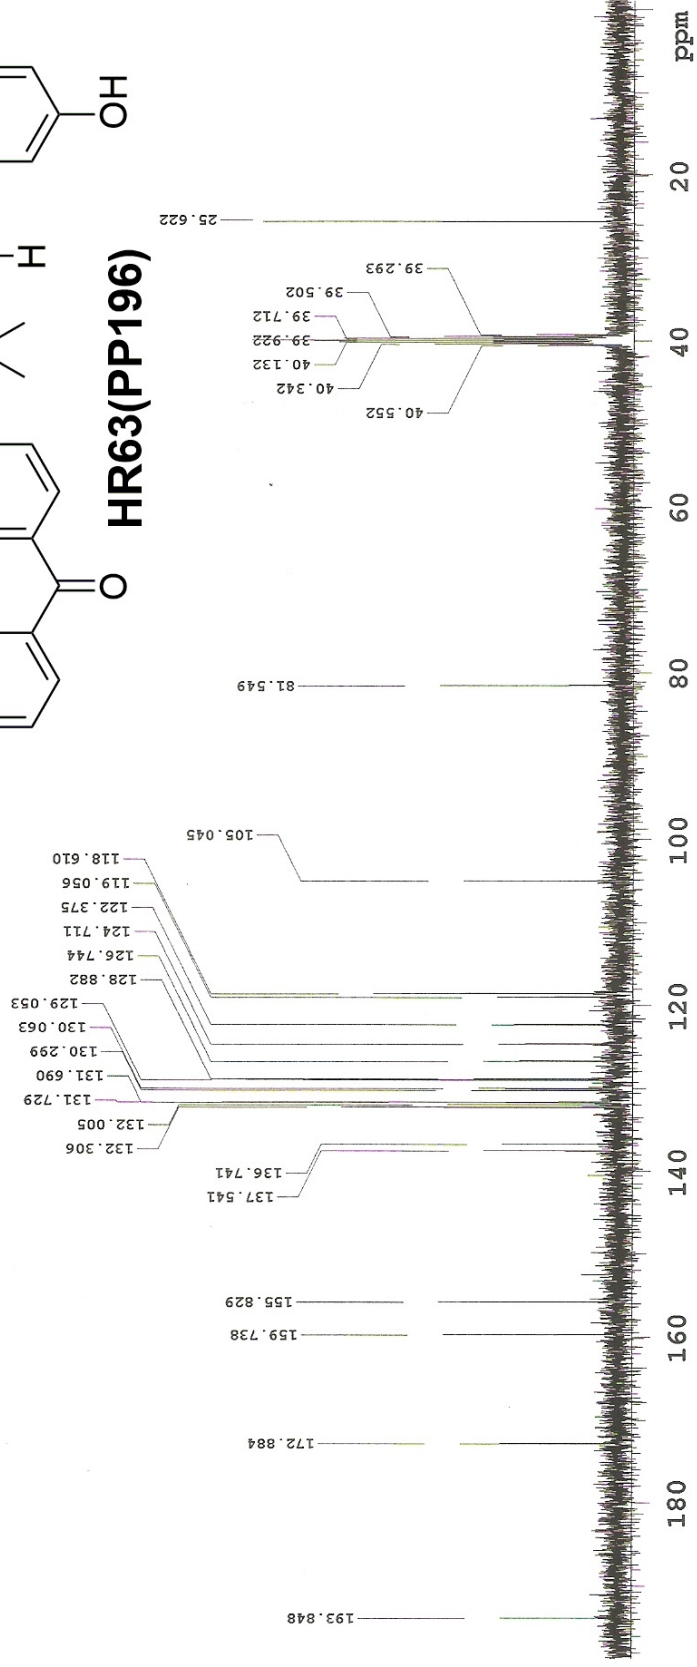





# <sup>1</sup>H-NMR(DMSO-d<sub>6</sub>) Varian Mercury 400 Plus

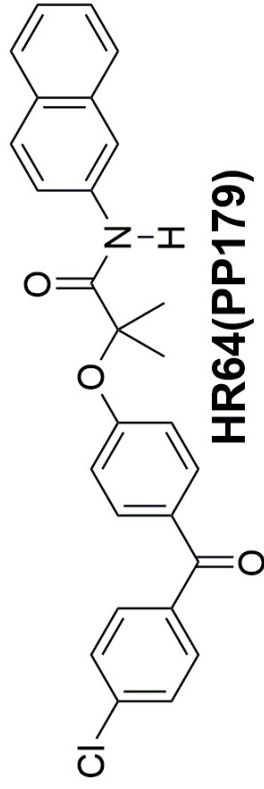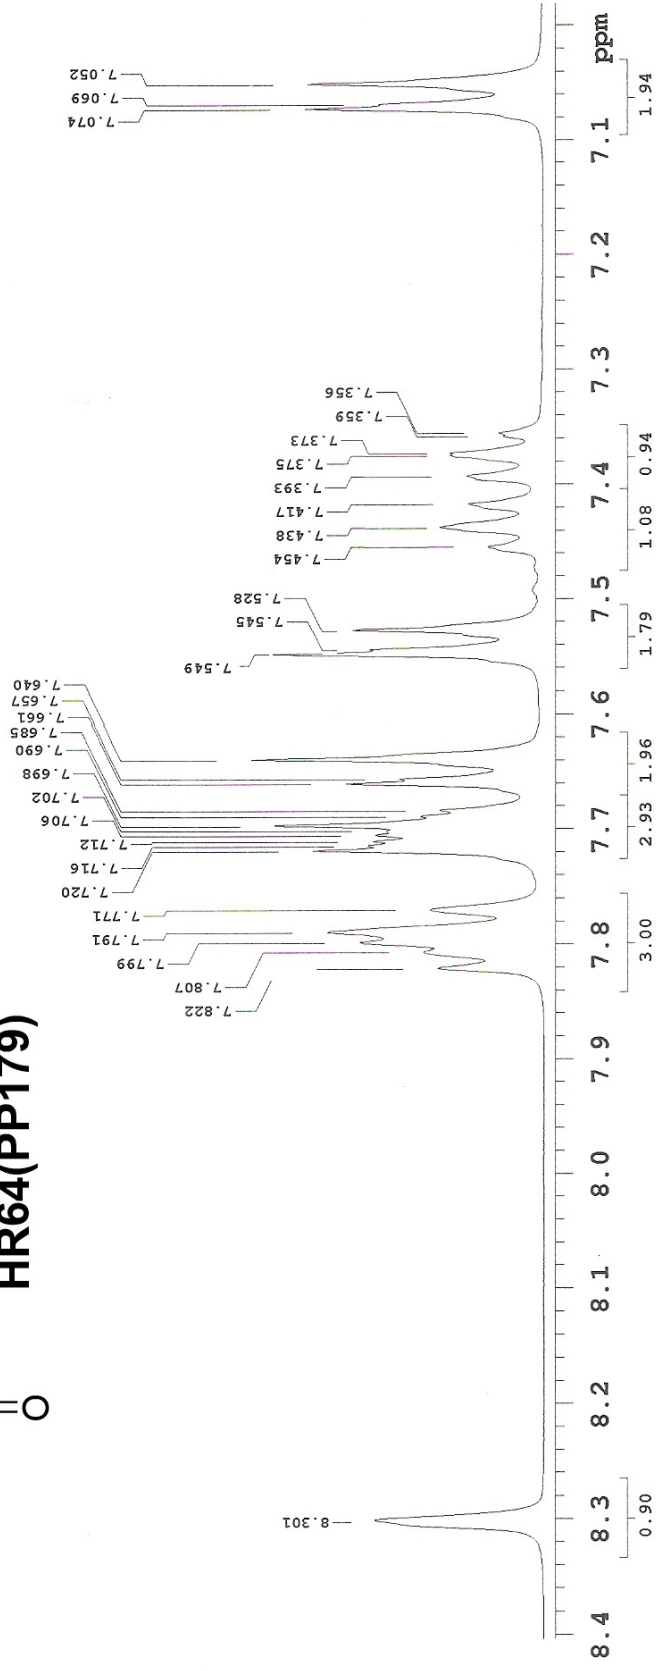

# <sup>13</sup>C-NMR(DMSO-d<sub>6</sub>) Varian Mercury 400 plus

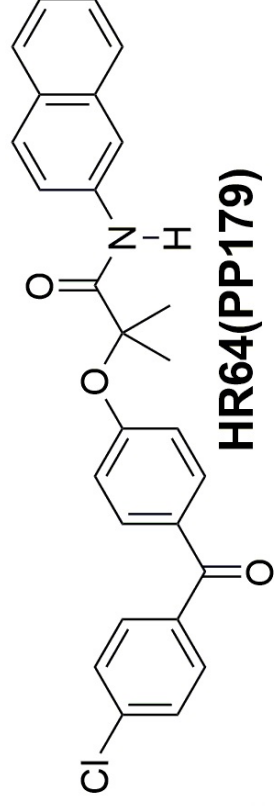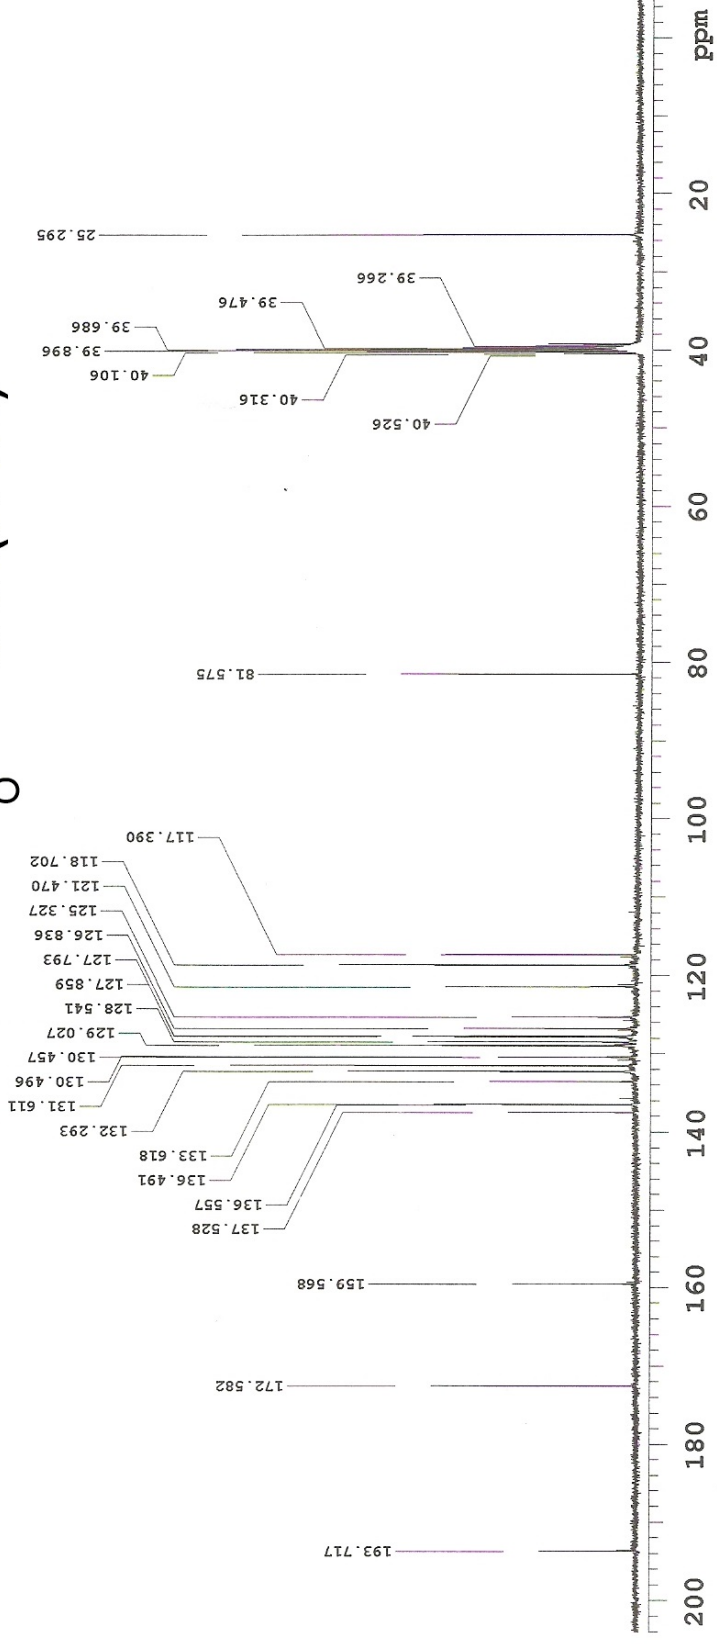

# <sup>1</sup>H-NMR(DMSO-d<sub>6</sub>) Varian Mercury 400 Plus

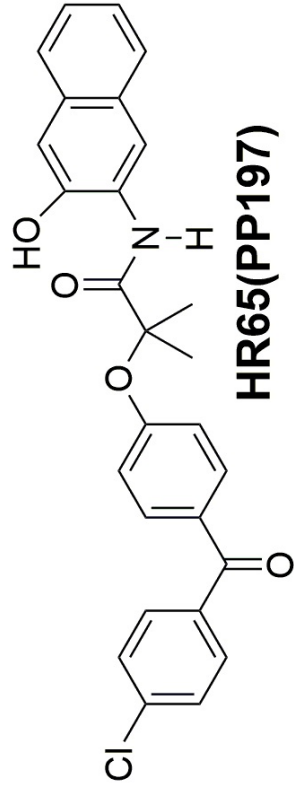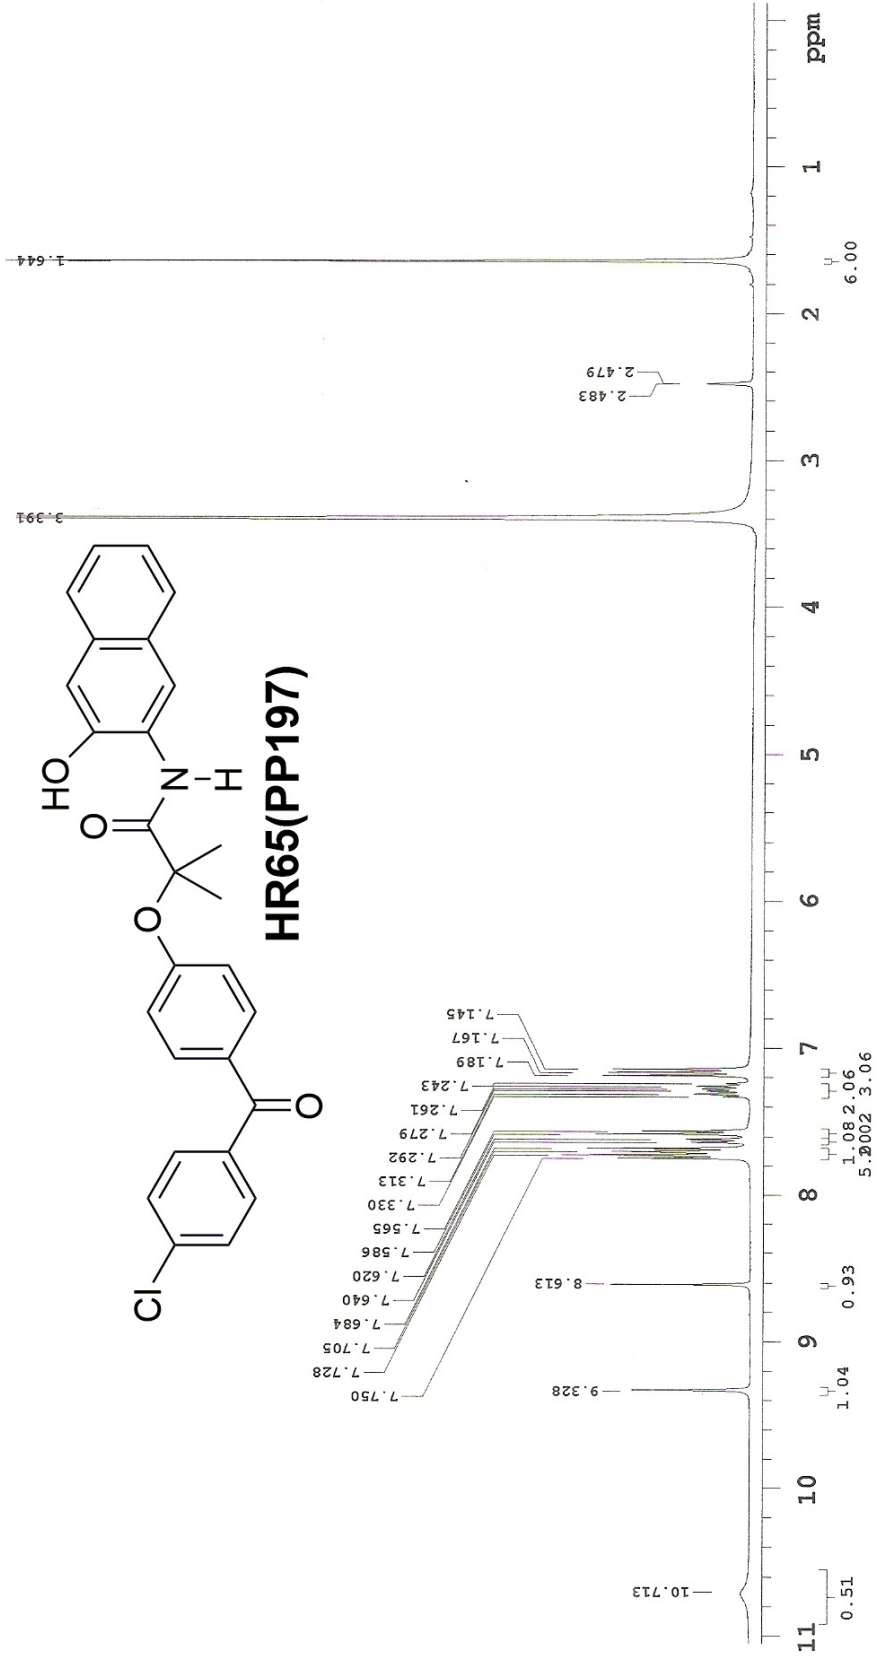

# <sup>1</sup>H-NMR(DMSO-d<sub>6</sub>) Varian Mercury 400 Plus

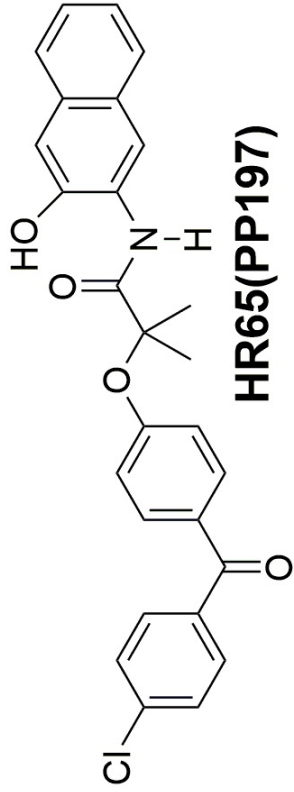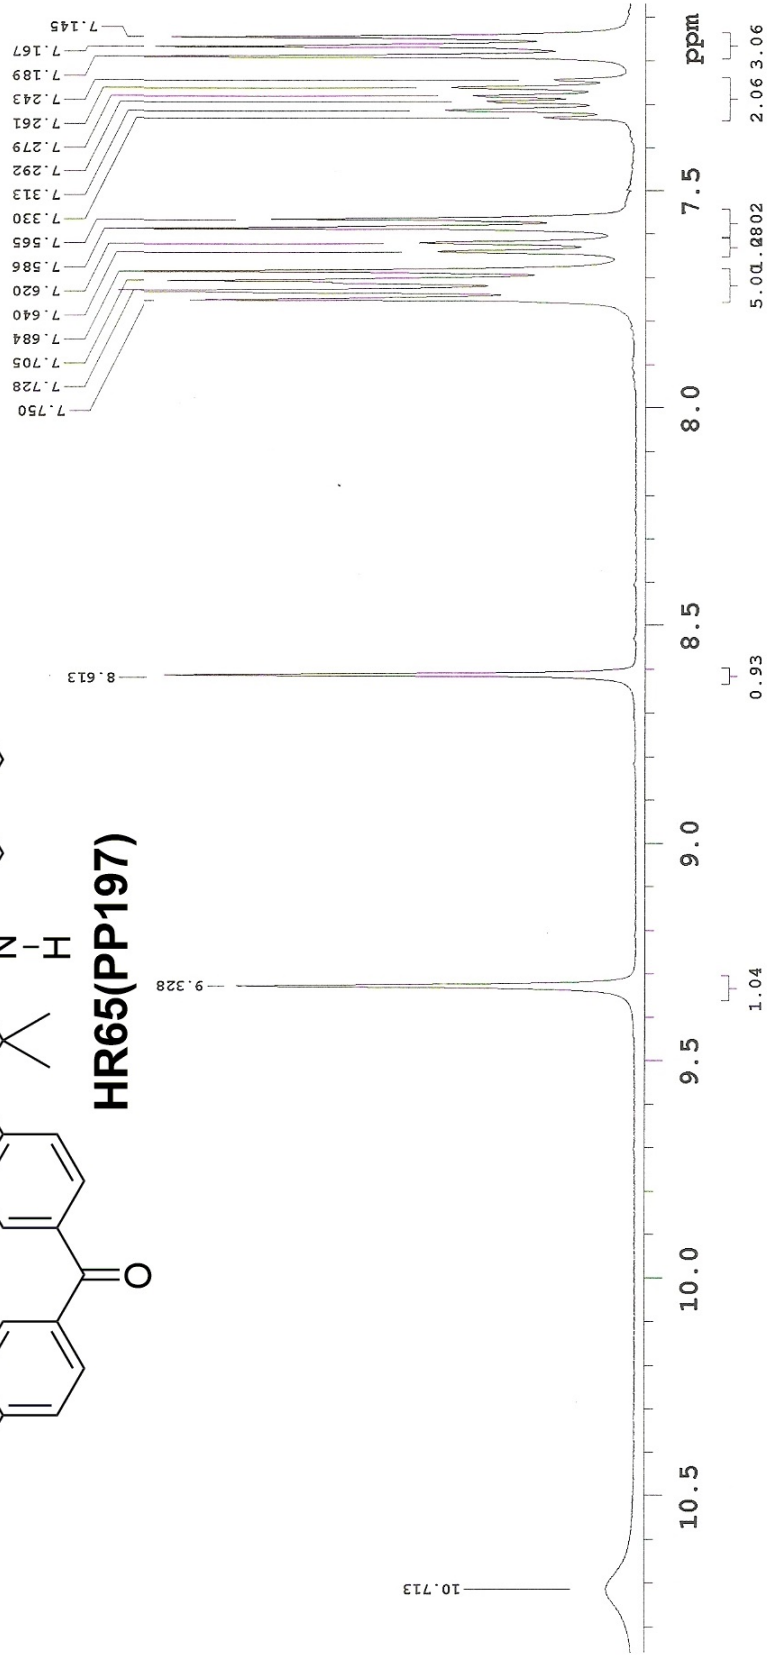

# <sup>13</sup>C-NMR(DMSO-d<sub>6</sub>) Varian Mercury 400 plus

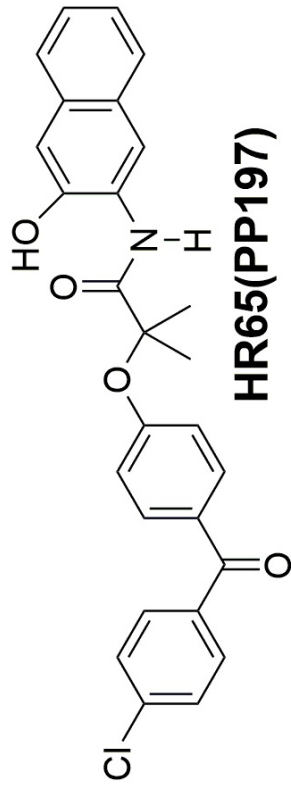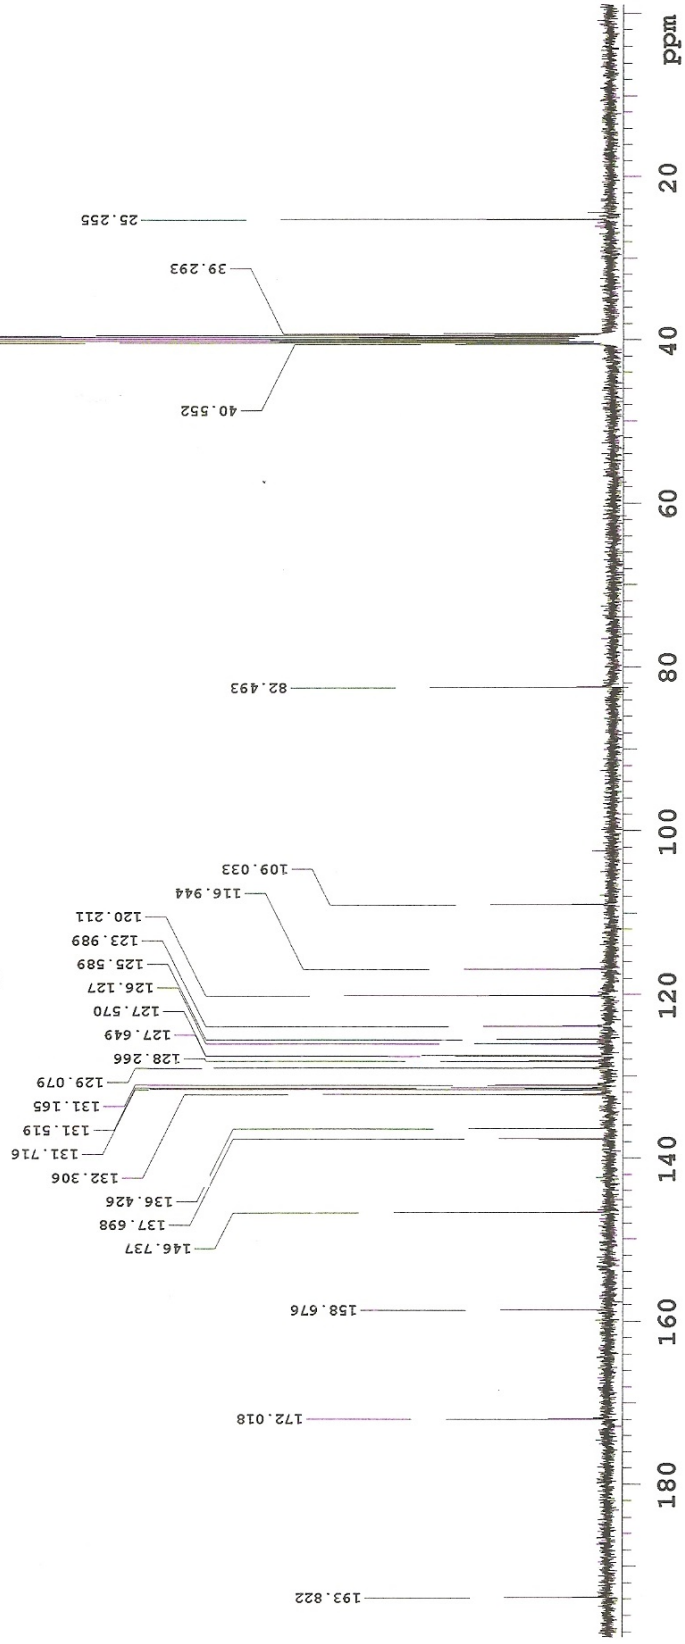

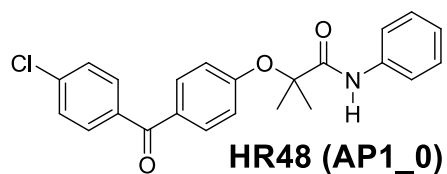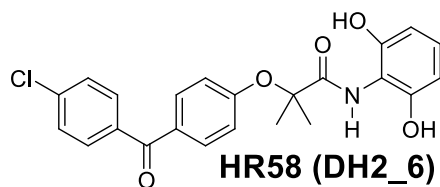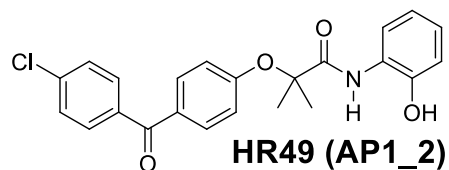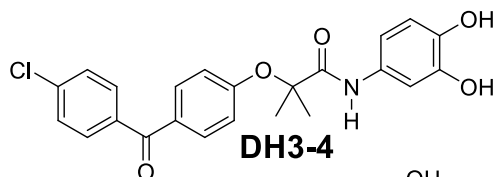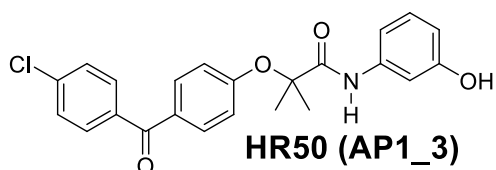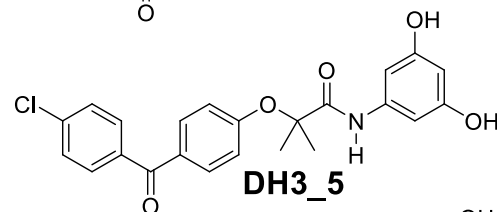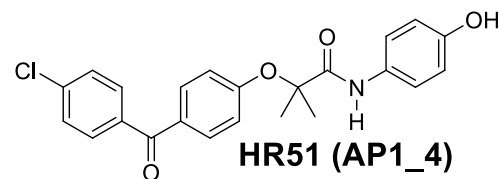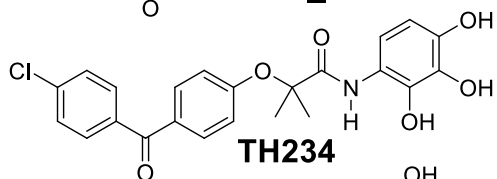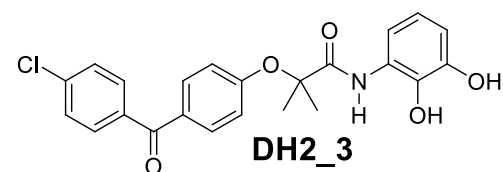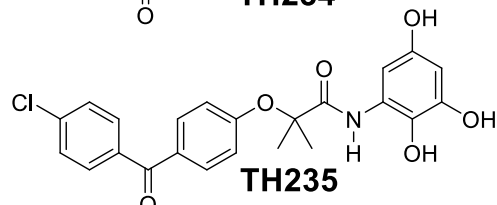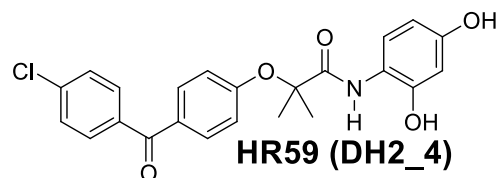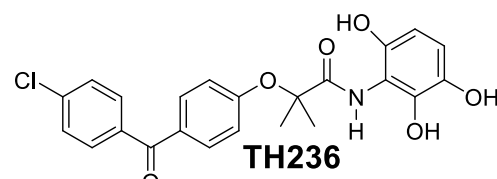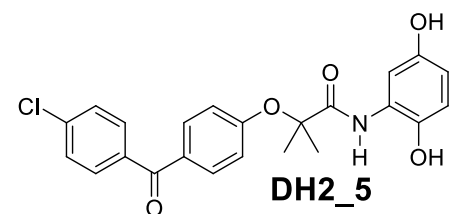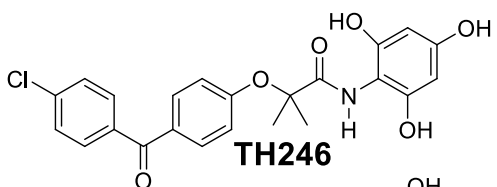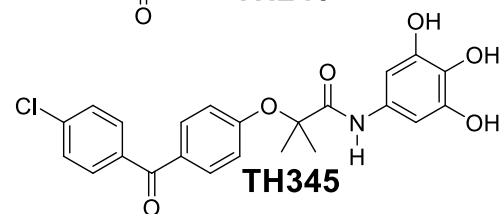

Scheme 1. Structures of hydroxy only *N*-phenyl **BPA** derivatives

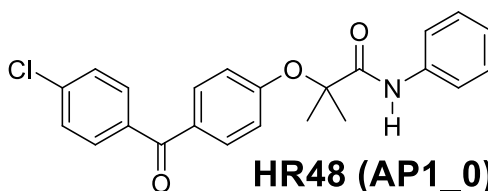

| Calc.   | Marvin 19.4 |      | HLB  | logS  | PL    | MPA   | MSA    | RF     | HBA | LogBB |
|---------|-------------|------|------|-------|-------|-------|--------|--------|-----|-------|
|         |             | T0   | 2.88 | -7.07 | 42.67 | 43.73 | 551.01 | 111.47 | 3   | 0.20  |
| ClogP   | 5.79        | 0    |      |       |       |       |        |        |     |       |
| ClogD   | 5.79        | 0    |      |       |       |       |        |        |     |       |
| MW      | 393.86      | 0.76 |      |       |       |       |        |        |     |       |
| TPSA    | 55.40       | 1    |      |       |       |       |        |        |     |       |
| HBD     | 1           | 0.83 |      |       |       |       |        |        |     |       |
| pKa     | 12.76       | 0    |      |       |       |       |        |        |     |       |
| CNS MPO | 2.59        |      |      |       |       |       |        |        |     |       |

HLB = hydrophilic-lipophilic balance; logS = water solubility; PL = polarizability( $\text{\AA}^3$ ); Minimal Projection Area ( $\text{\AA}^2$ ); MSA = molecular surface area; RF = Refractivity; HBA = hydrogen bond acceptors; LogBB = blood-brain distribution; ClogP = partitioning; ClogD = distribution at pKa; TPSA = polar surface area; HBD = hydrogen bond donors; CNS MPO = score for CNS penetration.

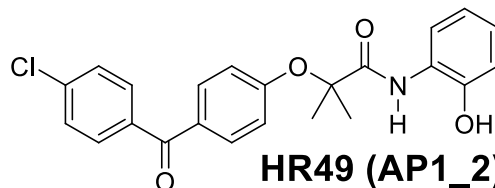

| Calc.   | Marvin 19.4 |      | HLB  | logS  | PL    | MPA   | MSA    | RF     | HBA | LogBB |
|---------|-------------|------|------|-------|-------|-------|--------|--------|-----|-------|
|         |             | T0   | 4.53 | -6.61 | 43.28 | 43.75 | 561.60 | 113.45 | 4   | -0.15 |
| ClogP   | 5.49        | 0    |      |       |       |       |        |        |     |       |
| ClogD   | 5.44        | 0    |      |       |       |       |        |        |     |       |
| MW      | 409.86      | 0.64 |      |       |       |       |        |        |     |       |
| TPSA    | 75.63       | 1    |      |       |       |       |        |        |     |       |
| HBD     | 2           | 0.5  |      |       |       |       |        |        |     |       |
| pKa     | 8.76        | 0.62 |      |       |       |       |        |        |     |       |
| CNS MPO | 2.76        |      |      |       |       |       |        |        |     |       |

HLB = hydrophilic-lipophilic balance; logS = water solubility; PL = polarizability( $\text{\AA}^3$ ); Minimal Projection Area ( $\text{\AA}^2$ ); MSA = molecular surface area; RF = Refractivity; HBA = hydrogen bond acceptors; LogBB = blood-brain distribution; ClogP = partitioning; ClogD = distribution at pKa; TPSA = polar surface area; HBD = hydrogen bond donors; CNS MPO = score for CNS penetration.



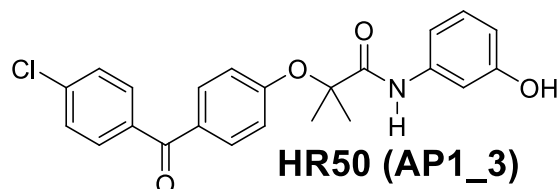

| Calc.   | Marvin 19.4 |      | HLB  | logS  | PL    | MPA   | MSA    | RF     | HBA | LogBB |
|---------|-------------|------|------|-------|-------|-------|--------|--------|-----|-------|
|         |             | T0   | 4.53 | -6.61 | 43.28 | 45.22 | 561.92 | 113.45 | 4   | -0.15 |
| ClogP   | 5.49        | 0    |      |       |       |       |        |        |     |       |
| ClogD   | 5.49        | 0    |      |       |       |       |        |        |     |       |
| MW      | 409.86      | 0.64 |      |       |       |       |        |        |     |       |
| TPSA    | 75.63       | 1    |      |       |       |       |        |        |     |       |
| HBD     | 2           | 0.5  |      |       |       |       |        |        |     |       |
| pKa     | 9.29        | 0.36 |      |       |       |       |        |        |     |       |
| CNS MPO | 2.5         |      |      |       |       |       |        |        |     |       |

HLB = hydrophilic-lipophilic balance; logS = water solubility; PL = polarizability( $\text{\AA}^3$ ); Minimal Projection Area ( $\text{\AA}^2$ ); MSA = molecular surface area; RF = Refractivity; HBA = hydrogen bond acceptors; LogBB = blood-brain distribution; ClogP = partitioning; ClogD = distribution at pKa; TPSA = polar surface area; HBD = hydrogen bond donors; CNS MPO = score for CNS penetration.

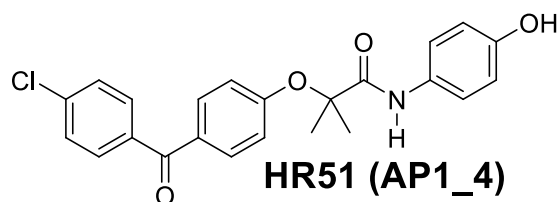

| Calc.   | Marvin 19.4 |      | HLB  | logS  | PL    | MPA   | MSA    | RF     | HBA | LogBB |
|---------|-------------|------|------|-------|-------|-------|--------|--------|-----|-------|
|         |             | T0   | 4.53 | -6.61 | 43.28 | 49.70 | 561.95 | 113.45 | 4   | -0.15 |
| ClogP   | 5.49        | 0    |      |       |       |       |        |        |     |       |
| ClogD   | 5.49        | 0    |      |       |       |       |        |        |     |       |
| MW      | 409.86      | 0.64 |      |       |       |       |        |        |     |       |
| TPSA    | 75.63       | 1    |      |       |       |       |        |        |     |       |
| HBD     | 2           | 0.5  |      |       |       |       |        |        |     |       |
| pKa     | 9.43        | 0.29 |      |       |       |       |        |        |     |       |
| CNS MPO | 2.45        |      |      |       |       |       |        |        |     |       |

HLB = hydrophilic-lipophilic balance; logS = water solubility; PL = polarizability( $\text{\AA}^3$ ); Minimal Projection Area ( $\text{\AA}^2$ ); MSA = molecular surface area; RF = Refractivity; HBA = hydrogen bond acceptors; LogBB = blood-brain distribution; ClogP = partitioning; ClogD = distribution at pKa; TPSA = polar surface area; HBD = hydrogen bond donors; CNS MPO = score for CNS penetration.

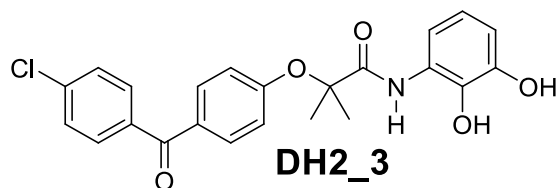

| Calc.   | Marvin 19.4 |      | HLB  | logS  | PL    | MPA   | MSA    | RF     | HBA | LogBB |
|---------|-------------|------|------|-------|-------|-------|--------|--------|-----|-------|
|         |             |      | 6.16 | -6.13 | 43.91 | 43.83 | 572.18 | 115.43 | 5   | -0.49 |
| ClogP   | 5.19        | 0    |      |       |       |       |        |        |     |       |
| ClogD   | 5.16        | 0    |      |       |       |       |        |        |     |       |
| MW      | 435.87      | 0.46 |      |       |       |       |        |        |     |       |
| TPSA    | 95.86       | 0.8  |      |       |       |       |        |        |     |       |
| HBD     | 3           | 0.17 |      |       |       |       |        |        |     |       |
| pKa     | 8.83        | 0.59 |      |       |       |       |        |        |     |       |
| CNS MPO | 2.02        |      |      |       |       |       |        |        |     |       |

HLB = hydrophilic-lipophilic balance; logS = water solubility; PL = polarizability( $\text{\AA}^3$ ); Minimal Projection Area ( $\text{\AA}^2$ ); MSA = molecular surface area; RF = Refractivity; HBA = hydrogen bond acceptors; LogBB = blood-brain distribution; ClogP = partitioning; ClogD = distribution at pKa; TPSA = polar surface area; HBD = hydrogen bond donors; CNS MPO = score for CNS penetration.

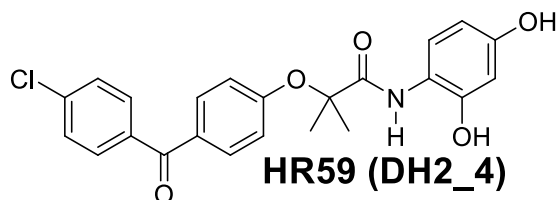

| Calc.   | Marvin 19.4 |      | HLB  | logS  | PL    | MPA   | MSA    | RF     | HBA | LogBB |
|---------|-------------|------|------|-------|-------|-------|--------|--------|-----|-------|
|         |             | T0   | 6.16 | -6.11 | 43.90 | 44.25 | 572.76 | 115.43 | 5   | -0.49 |
| ClogP   | 5.19        | 0    |      |       |       |       |        |        |     |       |
| ClogD   | 5.15        | 0    |      |       |       |       |        |        |     |       |
| MW      | 425.86      | 0.53 |      |       |       |       |        |        |     |       |
| TPSA    | 95.86       | 0.8  |      |       |       |       |        |        |     |       |
| HBD     | 3           | 0.17 |      |       |       |       |        |        |     |       |
| pKa     | 8.69        | 0.66 |      |       |       |       |        |        |     |       |
| CNS MPO | 2.16        |      |      |       |       |       |        |        |     |       |

HLB = hydrophilic-lipophilic balance; logS = water solubility; PL = polarizability( $\text{\AA}^3$ ); Minimal Projection Area ( $\text{\AA}^2$ ); MSA = molecular surface area; RF = Refractivity; HBA = hydrogen bond acceptors; LogBB = blood-brain distribution; ClogP = partitioning; ClogD = distribution at pKa; TPSA = polar surface area; HBD = hydrogen bond donors; CNS MPO = score for CNS penetration.

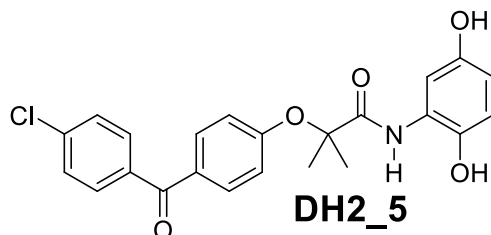

| Calc.      | Marvin 19.4 |    | HLB  | logS  | PL    | MPA   | MSA    | RF     | HBA | LogBB |
|------------|-------------|----|------|-------|-------|-------|--------|--------|-----|-------|
|            |             | T0 | 6.16 | -6.13 | 43.90 | 46.81 | 570.88 | 115.43 | 5   | -0.49 |
| ClogP      | 5.19        |    |      |       |       |       |        |        |     |       |
| ClogD      | 5.19        |    |      |       |       |       |        |        |     |       |
| MW         | 425.87      |    |      |       |       |       |        |        |     |       |
| TPSA       | 95.86       |    |      |       |       |       |        |        |     |       |
| HBD        | 3           |    |      |       |       |       |        |        |     |       |
| pKa        | 9.10        |    |      |       |       |       |        |        |     |       |
| CNS<br>MPO | 1.88        |    |      |       |       |       |        |        |     |       |

HLB = hydrophilic-lipophilic balance; logS = water solubility; PL = polarizability( $\text{\AA}^3$ ); Minimal Projection Area ( $\text{\AA}^2$ ); MSA = molecular surface area; RF = Refractivity; HBA = hydrogen bond acceptors; LogBB = blood-brain distribution; ClogP = partitioning; ClogD = distribution at pKa; TPSA = polar surface area; HBD = hydrogen bond donors; CNS MPO = score for CNS penetration.

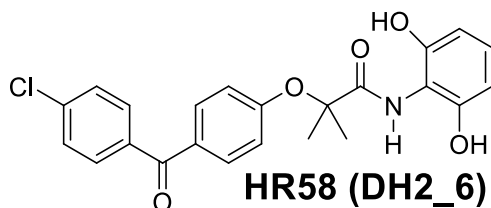

| Calc.      | Marvin 19.4 |      | HLB  | logS  | PL    | MPA   | MSA    | RF     | HBA | LogBB |
|------------|-------------|------|------|-------|-------|-------|--------|--------|-----|-------|
|            |             | T0   | 6.61 | -6.10 | 43.91 | 49.30 | 570.93 | 115.43 | 5   | -0.49 |
| ClogP      | 5.19        | 0    |      |       |       |       |        |        |     |       |
| ClogD      | 5.15        | 0    |      |       |       |       |        |        |     |       |
| MW         | 425.86      | 0.53 |      |       |       |       |        |        |     |       |
| TPSA       | 95.86       | 0.8  |      |       |       |       |        |        |     |       |
| HBD        | 3           | 0.17 |      |       |       |       |        |        |     |       |
| pKa        | 8.57        | 0.71 |      |       |       |       |        |        |     |       |
| CNS<br>MPO | 2.21        |      |      |       |       |       |        |        |     |       |

HLB = hydrophilic-lipophilic balance; logS = water solubility; PL = polarizability( $\text{\AA}^3$ ); Minimal Projection Area ( $\text{\AA}^2$ ); MSA = molecular surface area; RF = Refractivity; HBA = hydrogen bond acceptors; LogBB = blood-brain distribution; ClogP = partitioning; ClogD = distribution at pKa; TPSA = polar surface area; HBD = hydrogen bond donors; CNS MPO = score for CNS penetration.

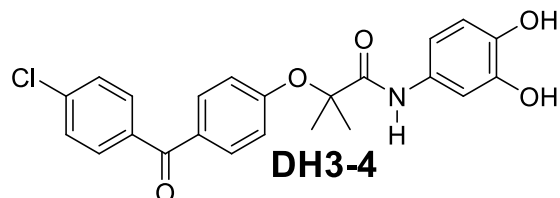

| Calc.      | Marvin 19.4 |      | HLB  | logS  | PL    | MPA   | MSA    | RF     | HBA | LogBB |
|------------|-------------|------|------|-------|-------|-------|--------|--------|-----|-------|
|            |             | T0   | 6.16 | -6.15 | 43.90 | 47.01 | 571.54 | 115.43 | 5   | -0.49 |
| ClogP      | 5.19        | 0    |      |       |       |       |        |        |     |       |
| ClogD      | 5.16        | 0    |      |       |       |       |        |        |     |       |
| MW         | 425.87      | 0.53 |      |       |       |       |        |        |     |       |
| TPSA       | 95.86       | 0.8  |      |       |       |       |        |        |     |       |
| HBD        | 3           | 0.17 |      |       |       |       |        |        |     |       |
| pKa        | 9.11        | 0.45 |      |       |       |       |        |        |     |       |
| CNS<br>MPO | 1.95        |      |      |       |       |       |        |        |     |       |

HLB = hydrophilic-lipophilic balance; logS = water solubility; PL = polarizability( $\text{\AA}^3$ ); Minimal Projection Area ( $\text{\AA}^2$ ); MSA = molecular surface area; RF = Refractivity; HBA = hydrogen bond acceptors; LogBB = blood-brain distribution; ClogP = partitioning; ClogD = distribution at pKa; TPSA = polar surface area; HBD = hydrogen bond donors; CNS MPO = score for CNS penetration.

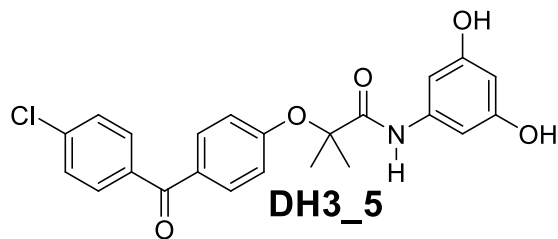

| Calc.      | Marvin 19.4 |      | HLB  | logS  | PL    | MPA   | MSA    | RF     | HBA | LogBB |
|------------|-------------|------|------|-------|-------|-------|--------|--------|-----|-------|
|            |             | T0   | 6.16 | -6.15 | 43.90 | 49.43 | 572.97 | 115.43 | 5   | -0.49 |
| ClogP      | 5.19        | 0    |      |       |       |       |        |        |     |       |
| ClogD      | 5.16        | 0    |      |       |       |       |        |        |     |       |
| MW         | 425.87      | 0.53 |      |       |       |       |        |        |     |       |
| TPSA       | 95.86       | 0.8  |      |       |       |       |        |        |     |       |
| HBD        | 3           | 01.7 |      |       |       |       |        |        |     |       |
| pKa        | 8.97        | 0.51 |      |       |       |       |        |        |     |       |
| CNS<br>MPO | 2.01        |      |      |       |       |       |        |        |     |       |

HLB = hydrophilic-lipophilic balance; logS = water solubility; PL = polarizability( $\text{\AA}^3$ ); Minimal Projection Area ( $\text{\AA}^2$ ); MSA = molecular surface area; RF = Refractivity; HBA = hydrogen bond acceptors; LogBB = blood-brain distribution; ClogP = partitioning; ClogD = distribution at pKa; TPSA = polar surface area; HBD = hydrogen bond donors; CNS MPO = score for CNS penetration.

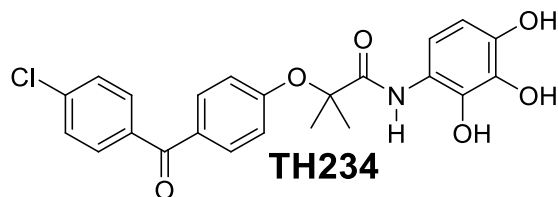

| Calc.      | Marvin 19.4 |      | HLB  | logS  | PL    | MPA   | MSA    | RF     | HBA | LogBB |
|------------|-------------|------|------|-------|-------|-------|--------|--------|-----|-------|
|            | T0          |      |      |       |       |       |        |        |     |       |
|            |             |      | 7.78 | -5.65 | 44.54 | 44.24 | 580.70 | 117.41 | 6   | -0.84 |
| ClogP      | 4.88        | 0.06 |      |       |       |       |        |        |     |       |
| ClogD      | 4.82        | 0    |      |       |       |       |        |        |     |       |
| MW         | 441.86      | 0.42 |      |       |       |       |        |        |     |       |
| TPSA       | 116.09      | 0.13 |      |       |       |       |        |        |     |       |
| HBD        | 4           | 0    |      |       |       |       |        |        |     |       |
| pKa        | 8.59        | 0.71 |      |       |       |       |        |        |     |       |
| CNS<br>MPO | 1.32        |      |      |       |       |       |        |        |     |       |

HLB = hydrophilic-lipophilic balance; logS = water solubility; PL = polarizability( $\text{\AA}^3$ ); Minimal Projection Area ( $\text{\AA}^2$ ); MSA = molecular surface area; RF = Refractivity; HBA = hydrogen bond acceptors; LogBB = blood-brain distribution; ClogP = partitioning; ClogD = distribution at pKa; TPSA = polar surface area; HBD = hydrogen bond donors; CNS MPO = score for CNS penetration.

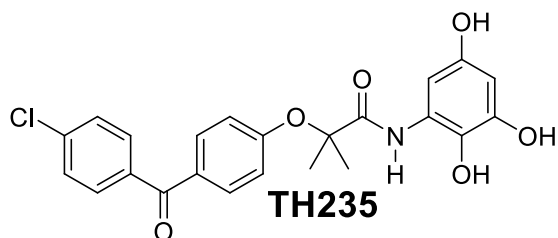

| Calc.      | Marvin 19.4 |      | HLB  | logS  | PL    | MPA   | MSA    | RF     | HBA | LogBB |
|------------|-------------|------|------|-------|-------|-------|--------|--------|-----|-------|
|            | T0          |      |      |       |       |       |        |        |     |       |
|            |             |      | 7.78 | -5.69 | 44.54 | 47.22 | 583.06 | 117.41 | 6   | -0.84 |
| ClogP      | 4.88        | 0.06 |      |       |       |       |        |        |     |       |
| ClogD      | 4.86        | 0    |      |       |       |       |        |        |     |       |
| MW         | 441.86      | 0.42 |      |       |       |       |        |        |     |       |
| TPSA       | 116.09      | 0.13 |      |       |       |       |        |        |     |       |
| HBD        | 4           | 0    |      |       |       |       |        |        |     |       |
| pKa        | 9.02        | 0.49 |      |       |       |       |        |        |     |       |
| CNS<br>MPO | 1.10        |      |      |       |       |       |        |        |     |       |

HLB = hydrophilic-lipophilic balance; logS = water solubility; PL = polarizability( $\text{\AA}^3$ ); Minimal Projection Area ( $\text{\AA}^2$ ); MSA = molecular surface area; RF = Refractivity; HBA = hydrogen bond acceptors; LogBB = blood-brain distribution; ClogP = partitioning; ClogD = distribution at pKa; TPSA = polar surface area; HBD = hydrogen bond donors; CNS MPO = score for CNS penetration.

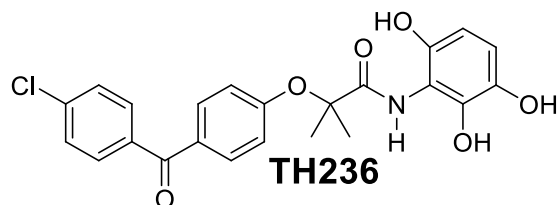

| Calc.      | Marvin 19.4 | HLB  | logS  | PL    | MPA   | MSA    | RF     | HBA | LogBB |
|------------|-------------|------|-------|-------|-------|--------|--------|-----|-------|
|            | T0          | 7.78 | -5.66 | 44.54 | 50.93 | 580.70 | 117.41 | 6   | -0.84 |
| ClogP      | 4.88        | 0.06 |       |       |       |        |        |     |       |
| ClogD      | 4.85        | 0    |       |       |       |        |        |     |       |
| MW         | 441.86      | 0.42 |       |       |       |        |        |     |       |
| TPSA       | 116.09      | 0.13 |       |       |       |        |        |     |       |
| HBD        | 4           | 0    |       |       |       |        |        |     |       |
| pKa        | 8.82        | 0.49 |       |       |       |        |        |     |       |
| CNS<br>MPO | 1.10        |      |       |       |       |        |        |     |       |

HLB = hydrophilic-lipophilic balance; logS = water solubility; PL = polarizability( $\text{\AA}^3$ ); Minimal Projection Area ( $\text{\AA}^2$ ); MSA = molecular surface area; RF = Refractivity; HBA = hydrogen bond acceptors; LogBB = blood-brain distribution; ClogP = partitioning; ClogD = distribution at pKa; TPSA = polar surface area; HBD = hydrogen bond donors; CNS MPO = score for CNS penetration.

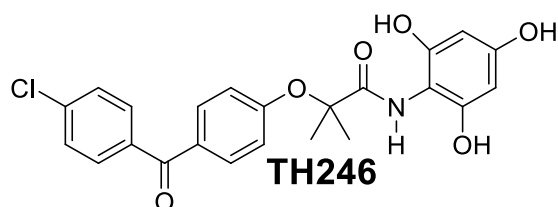

| Calc.      | Marvin 19.4 | HLB  | logS  | PL    | MPA   | MSA    | RF     | HBA | LogBB |
|------------|-------------|------|-------|-------|-------|--------|--------|-----|-------|
|            | T0          | 7.78 | -5.64 | 44.54 | 48.27 | 581.00 | 117.41 | 6   | -0.84 |
| ClogP      | 4.88        | 0.06 |       |       |       |        |        |     |       |
| ClogD      | 4.81        | 0    |       |       |       |        |        |     |       |
| MW         | 441.86      | 0.42 |       |       |       |        |        |     |       |
| TPSA       | 116.09      | 0.13 |       |       |       |        |        |     |       |
| HBD        | 4           | 0    |       |       |       |        |        |     |       |
| pKa        | 8.54        | 0.73 |       |       |       |        |        |     |       |
| CNS<br>MPO | 1.34        |      |       |       |       |        |        |     |       |

HLB = hydrophilic-lipophilic balance; logS = water solubility; PL = polarizability( $\text{\AA}^3$ ); Minimal Projection Area ( $\text{\AA}^2$ ); MSA = molecular surface area; RF = Refractivity; HBA = hydrogen bond acceptors; LogBB = blood-brain distribution; ClogP = partitioning; ClogD = distribution at pKa; TPSA = polar surface area; HBD = hydrogen bond donors; CNS MPO = score for CNS penetration.

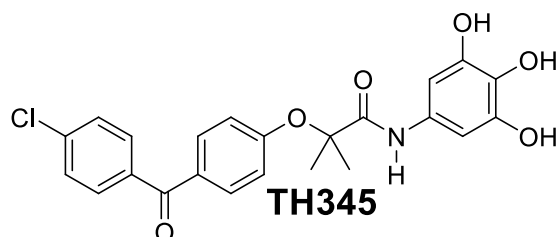

| Calc.      | Marvin 19.4 | HLB  | logS  | PL    | MPA   | MSA    | RF     | HBA | LogBB |
|------------|-------------|------|-------|-------|-------|--------|--------|-----|-------|
|            | T0          | 7.78 | -5.68 | 44.54 | 48.64 | 581.66 | 117.41 | 6   | -0.84 |
| ClogP      | 4.88        | 0.06 |       |       |       |        |        |     |       |
| ClogD      | 4.85        | 0    |       |       |       |        |        |     |       |
| MW         | 441.86      | 0.42 |       |       |       |        |        |     |       |
| TPSA       | 116.09      | 0.13 |       |       |       |        |        |     |       |
| HBD        | 4           | 0    |       |       |       |        |        |     |       |
| pKa        | 8.77        | 0.62 |       |       |       |        |        |     |       |
| CNS<br>MPO | 1.23        |      |       |       |       |        |        |     |       |

HLB = hydrophilic-lipophilic balance; logS = water solubility; PL = polarizability( $\text{\AA}^3$ ); Minimal Projection Area ( $\text{\AA}^2$ ); MSA = molecular surface area; RF = Refractivity; HBA = hydrogen bond acceptors; LogBB = blood-brain distribution; ClogP = partitioning; ClogD = distribution at pKa; TPSA = polar surface area; HBD = hydrogen bond donors; CNS MPO = score for CNS penetration.

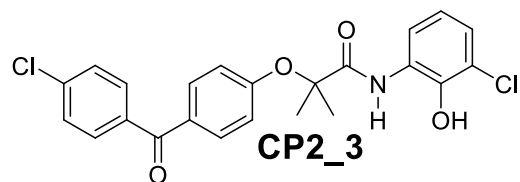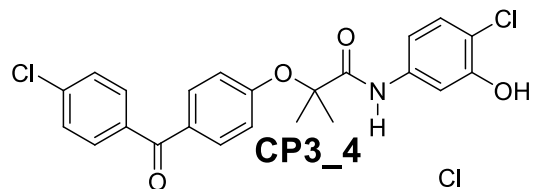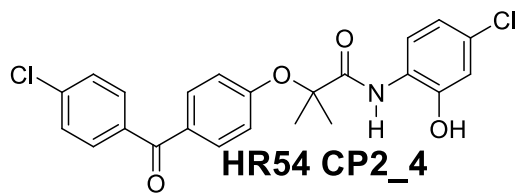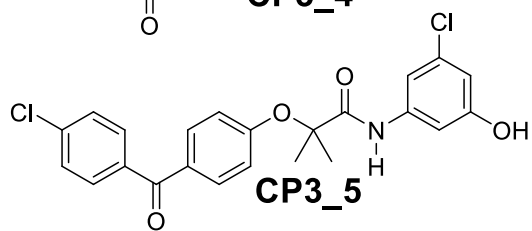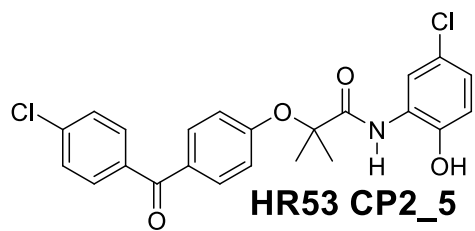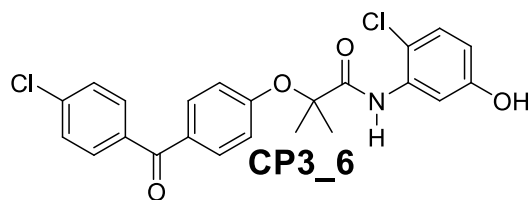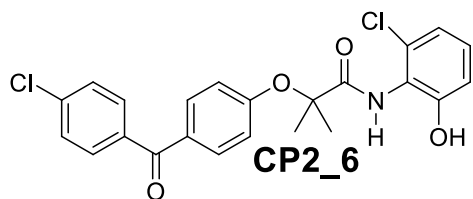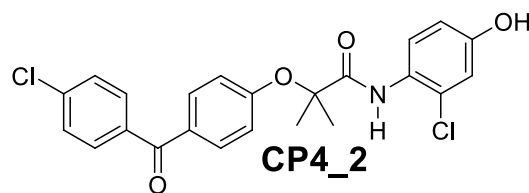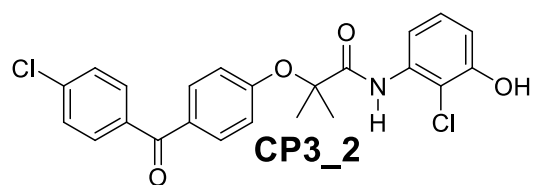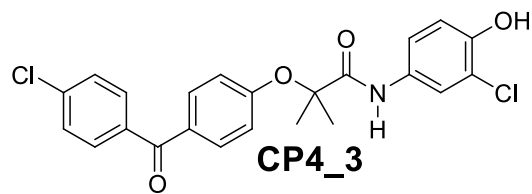

Scheme 2. Chloro hydroxyphenyl **BPA** derivatives (**CP** derivatives)



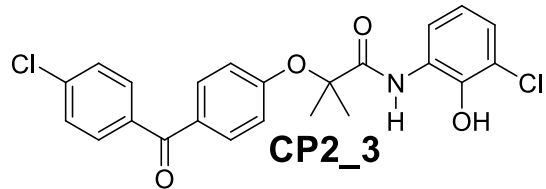

| Calc.      | Marvin 19.4 |     | HLB  | logS  | PL    | MPA   | MSA    | RF     | HBA | LogBB |
|------------|-------------|-----|------|-------|-------|-------|--------|--------|-----|-------|
|            |             | T0  | 4.80 | -6.85 | 45.19 | 45.66 | 575.52 | 118.26 | 4   | -0.05 |
| ClogP      | 6.09        | 0   |      |       |       |       |        |        |     |       |
| ClogD      | 5.30        | 0   |      |       |       |       |        |        |     |       |
| MW         | 444.31      | 0.4 |      |       |       |       |        |        |     |       |
| TPSA       | 75.63       | 1   |      |       |       |       |        |        |     |       |
| HBD        | 2           | 0.5 |      |       |       |       |        |        |     |       |
| pKa        | 7.26        | 1   |      |       |       |       |        |        |     |       |
| CNS<br>MPO | 2.90        |     |      |       |       |       |        |        |     |       |

HLB = hydrophilic-lipophilic balance; logS = water solubility; PL = polarizability( $\text{\AA}^3$ ); Minimal Projection Area ( $\text{\AA}^2$ ); MSA = molecular surface area; RF = Refractivity; HBA = hydrogen bond acceptors; LogBB = blood-brain distribution; ClogP = partitioning; ClogD = distribution at pKa; TPSA = polar surface area; HBD = hydrogen bond donors; CNS MPO = score for CNS penetration.

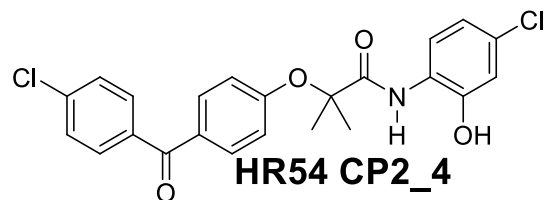

| Calc.      | Marvin 19.4 |     | HLB  | logS  | PL    | MPA   | MSA    | RF     | HBA | LogBB |
|------------|-------------|-----|------|-------|-------|-------|--------|--------|-----|-------|
|            |             | T0  | 4.80 | -7.08 | 45.17 | 46.41 | 576.77 | 118.26 | 4   | -0.05 |
| ClogP      | 6.09        | 0   |      |       |       |       |        |        |     |       |
| ClogD      | 5.95        | 0   |      |       |       |       |        |        |     |       |
| MW         | 444.31      | 0.4 |      |       |       |       |        |        |     |       |
| TPSA       | 75.63       | 1   |      |       |       |       |        |        |     |       |
| HBD        | 2           | 0.5 |      |       |       |       |        |        |     |       |
| pKa        | 8.01        | 1   |      |       |       |       |        |        |     |       |
| CNS<br>MPO | 2.9         |     |      |       |       |       |        |        |     |       |

HLB = hydrophilic-lipophilic balance; logS = water solubility; PL = polarizability( $\text{\AA}^3$ ); Minimal Projection Area ( $\text{\AA}^2$ ); MSA = molecular surface area; RF = Refractivity; HBA = hydrogen bond acceptors; LogBB = blood-brain distribution; ClogP = partitioning; ClogD = distribution at pKa; TPSA = polar surface area; HBD = hydrogen bond donors; CNS MPO = score for CNS penetration.

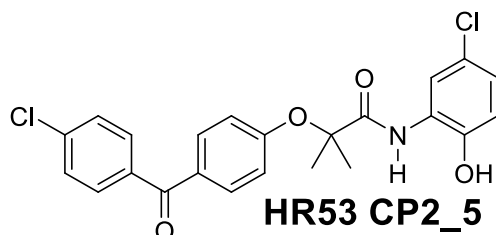

| Calc.   | Marvin 19.4 |      | HLB  | logS  | PL    | MPA   | MSA    | RF     | HBA | LogBB |
|---------|-------------|------|------|-------|-------|-------|--------|--------|-----|-------|
|         |             | T0   | 4.80 | -7.15 | 45.17 | 49.87 | 577.82 | 118.26 | 4   | -0.05 |
| ClogP   | 6.09        | 0    |      |       |       |       |        |        |     |       |
| ClogD   | 5.95        | 0    |      |       |       |       |        |        |     |       |
| MW      | 444.31      | 0.4  |      |       |       |       |        |        |     |       |
| TPSA    | 75.63       | 1    |      |       |       |       |        |        |     |       |
| HBD     | 2           | 0.5  |      |       |       |       |        |        |     |       |
| pKa     | 8.22        | 0.89 |      |       |       |       |        |        |     |       |
| CNS MPO | 2.79        |      |      |       |       |       |        |        |     |       |

HLB = hydrophilic-lipophilic balance; logS = water solubility; PL = polarizability( $\text{\AA}^3$ ); Minimal Projection Area ( $\text{\AA}^2$ ); MSA = molecular surface area; RF = Refractivity; HBA = hydrogen bond acceptors; LogBB = blood-brain distribution; ClogP = partitioning; ClogD = distribution at pKa; TPSA = polar surface area; HBD = hydrogen bond donors; CNS MPO = score for CNS penetration.

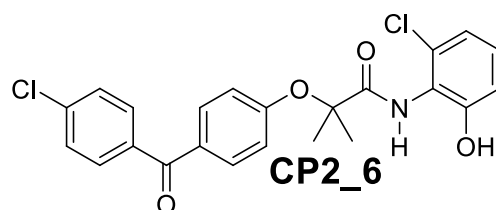

| Calc.   | Marvin 19.4 |      | HLB  | logS  | PL    | MPA   | MSA    | RF     | HBA | LogBB |
|---------|-------------|------|------|-------|-------|-------|--------|--------|-----|-------|
|         |             | T0   | 4.80 | -6.71 | 45.19 | 47.21 | 575.65 | 118.26 | 4   | -0.05 |
| ClogP   | 6.09        | 0    |      |       |       |       |        |        |     |       |
| ClogD   | 5.95        | 0    |      |       |       |       |        |        |     |       |
| MW      | 444.31      | 0.4  |      |       |       |       |        |        |     |       |
| TPSA    | 75.63       | 1    |      |       |       |       |        |        |     |       |
| HBD     | 2           | 0.5  |      |       |       |       |        |        |     |       |
| pKa     | 8.11        | 0.95 |      |       |       |       |        |        |     |       |
| CNS MPO | 2.85        |      |      |       |       |       |        |        |     |       |

HLB = hydrophilic-lipophilic balance; logS = water solubility; PL = polarizability( $\text{\AA}^3$ ); Minimal Projection Area ( $\text{\AA}^2$ ); MSA = molecular surface area; RF = Refractivity; HBA = hydrogen bond acceptors; LogBB = blood-brain distribution; ClogP = partitioning; ClogD = distribution at pKa; TPSA = polar surface area; HBD = hydrogen bond donors; CNS MPO = score for CNS penetration.



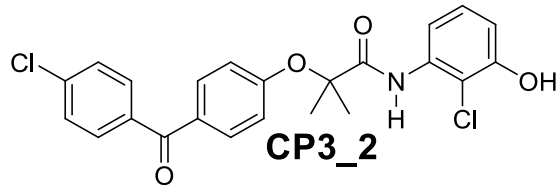

| Calc. | Marvin 19.4 |     | HLB  | logS  | PL    | MPA   | MSA    | RF     | HBA | LogBB |
|-------|-------------|-----|------|-------|-------|-------|--------|--------|-----|-------|
|       |             | T0  | 4.80 | -7.01 | 45.20 | 48.06 | 574.64 | 118.26 | 4   | -0.05 |
| ClogP | 6.09        | 0   |      |       |       |       |        |        |     |       |
| ClogD | 5.85        | 0   |      |       |       |       |        |        |     |       |
| MW    | 444.31      | 0.4 |      |       |       |       |        |        |     |       |
| TPSA  | 75.63       | 1   |      |       |       |       |        |        |     |       |
| HBD   | 2           | 0.5 |      |       |       |       |        |        |     |       |
| pKa   | 7.76        | 1   |      |       |       |       |        |        |     |       |
| CNS   | 2.90        |     |      |       |       |       |        |        |     |       |
| MPO   |             |     |      |       |       |       |        |        |     |       |

HLB = hydrophilic-lipophilic balance; logS = water solubility; PL = polarizability( $\text{\AA}^3$ ); Minimal Projection Area ( $\text{\AA}^2$ ); MSA = molecular surface area; RF = Refractivity; HBA = hydrogen bond acceptors; LogBB = blood-brain distribution; ClogP = partitioning; ClogD = distribution at pKa; TPSA = polar surface area; HBD = hydrogen bond donors; CNS MPO = score for CNS penetration.

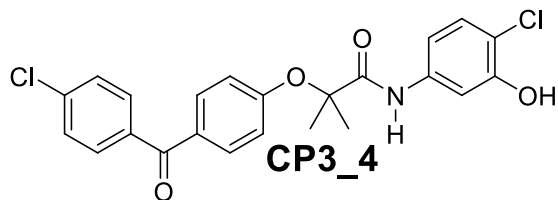

| Calc. | Marvin 19.4 |     | HLB  | logS  | PL    | MPA   | MSA    | RF     | HBA | LogBB |
|-------|-------------|-----|------|-------|-------|-------|--------|--------|-----|-------|
|       |             | T0  | 4.80 | -6.98 | 45.19 | 44.91 | 577.63 | 118.26 | 4   | -0.05 |
| ClogP | 6.09        | 0   |      |       |       |       |        |        |     |       |
| ClogD | 5.78        | 0   |      |       |       |       |        |        |     |       |
| MW    | 444.31      | 0.4 |      |       |       |       |        |        |     |       |
| TPSA  | 75.63       | 1   |      |       |       |       |        |        |     |       |
| HBD   | 2           | 0.5 |      |       |       |       |        |        |     |       |
| pKa   | 7.65        | 1   |      |       |       |       |        |        |     |       |
| CNS   | 2.90        |     |      |       |       |       |        |        |     |       |
| MPO   |             |     |      |       |       |       |        |        |     |       |

HLB = hydrophilic-lipophilic balance; logS = water solubility; PL = polarizability( $\text{\AA}^3$ ); Minimal Projection Area ( $\text{\AA}^2$ ); MSA = molecular surface area; RF = Refractivity; HBA = hydrogen bond acceptors; LogBB = blood-brain distribution; ClogP = partitioning; ClogD = distribution at pKa; TPSA = polar surface area; HBD = hydrogen bond donors; CNS MPO = score for CNS penetration.

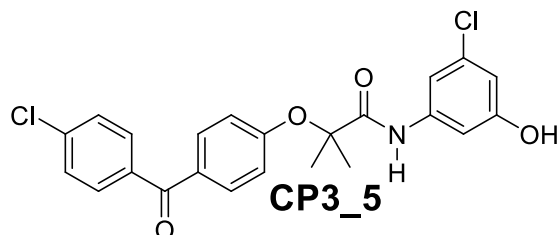

| Calc.   | Marvin 19.4 | HLB  | logS  | PL    | MPA   | MSA    | RF     | HBA | LogBB |
|---------|-------------|------|-------|-------|-------|--------|--------|-----|-------|
|         | T0          | 4.80 | -7.21 | 45.17 | 50.31 | 578.04 | 118.26 | 4   | -0.05 |
| ClogP   | 6.09        | 0    |       |       |       |        |        |     |       |
| ClogD   | 6.01        | 0    |       |       |       |        |        |     |       |
| MW      | 444.31      | 0.4  |       |       |       |        |        |     |       |
| TPSA    | 75.63       | 1    |       |       |       |        |        |     |       |
| HBD     | 2           | 0.5  |       |       |       |        |        |     |       |
| pKa     | 8.50        | 0.75 |       |       |       |        |        |     |       |
| CNS MPO | 2.65        |      |       |       |       |        |        |     |       |

HLB = hydrophilic-lipophilic balance; logS = water solubility; PL = polarizability( $\text{\AA}^3$ ); Minimal Projection Area ( $\text{\AA}^2$ ); MSA = molecular surface area; RF = Refractivity; HBA = hydrogen bond acceptors; LogBB = blood-brain distribution; ClogP = partitioning; ClogD = distribution at pKa; TPSA = polar surface area; HBD = hydrogen bond donors; CNS MPO = score for CNS penetration.

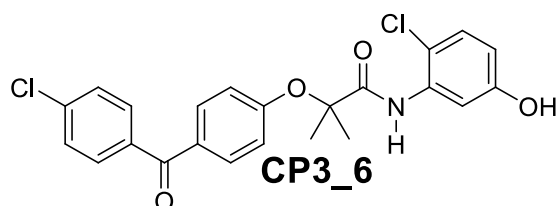

| Calc.   | Marvin 19.4 | HLB  | logS  | PL    | MPA   | MSA    | RF     | HBA | LogBB |
|---------|-------------|------|-------|-------|-------|--------|--------|-----|-------|
|         | T0          | 4.80 | -7.21 | 45.18 | 50.35 | 576.47 | 118.26 | 4   | -0.05 |
| ClogP   | 6.09        | 0    |       |       |       |        |        |     |       |
| ClogD   | 6.05        | 0    |       |       |       |        |        |     |       |
| MW      | 444.31      | 0.4  |       |       |       |        |        |     |       |
| TPSA    | 75.63       | 1    |       |       |       |        |        |     |       |
| HBD     | 2           | 0.5  |       |       |       |        |        |     |       |
| pKa     | 8.75        | 0.63 |       |       |       |        |        |     |       |
| CNS MPO | 2.53        |      |       |       |       |        |        |     |       |

HLB = hydrophilic-lipophilic balance; logS = water solubility; PL = polarizability( $\text{\AA}^3$ ); Minimal Projection Area ( $\text{\AA}^2$ ); MSA = molecular surface area; RF = Refractivity; HBA = hydrogen bond acceptors; LogBB = blood-brain distribution; ClogP = partitioning; ClogD = distribution at pKa; TPSA = polar surface area; HBD = hydrogen bond donors; CNS MPO = score for CNS penetration.

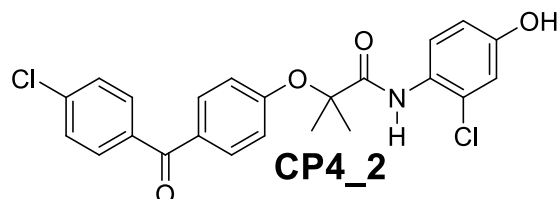

| Calc. | Marvin 19.4 |     | HLB  | logS  | PL    | MPA   | MSA    | RF     | HBA | LogBB |
|-------|-------------|-----|------|-------|-------|-------|--------|--------|-----|-------|
|       |             | T0  | 4.80 | -7.23 | 45.19 | 47.29 | 576.66 | 118.26 | 4   | -0.05 |
| ClogP | 6.09        | 0   |      |       |       |       |        |        |     |       |
| ClogD | 6.06        | 0   |      |       |       |       |        |        |     |       |
| MW    | 444.31      | 0.4 |      |       |       |       |        |        |     |       |
| TPSA  | 75.63       | 1   |      |       |       |       |        |        |     |       |
| HBD   | 2           | 0.5 |      |       |       |       |        |        |     |       |
| pKa   | 8.80        | 0.6 |      |       |       |       |        |        |     |       |
| CNS   | 2.50        |     |      |       |       |       |        |        |     |       |
| MPO   |             |     |      |       |       |       |        |        |     |       |

HLB = hydrophilic-lipophilic balance; logS = water solubility; PL = polarizability( $\text{\AA}^3$ ); Minimal Projection Area ( $\text{\AA}^2$ ); MSA = molecular surface area; RF = Refractivity; HBA = hydrogen bond acceptors; LogBB = blood-brain distribution; ClogP = partitioning; ClogD = distribution at pKa; TPSA = polar surface area; HBD = hydrogen bond donors; CNS MPO = score for CNS penetration.

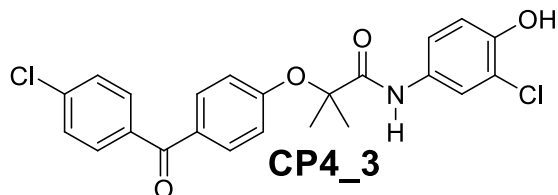

| Calc. | Marvin 19.4 |    | HLB  | logS  | PL    | MPA   | MSA    | RF     | HBA | LogBB |
|-------|-------------|----|------|-------|-------|-------|--------|--------|-----|-------|
|       |             | T0 | 4.80 | -7.06 | 45.13 | 46.04 | 576.24 | 118.26 | 4   | -0.05 |
| ClogP | 6.09        |    |      |       |       |       |        |        |     |       |
| ClogD | 5.89        |    |      |       |       |       |        |        |     |       |
| MW    | 444.31      |    |      |       |       |       |        |        |     |       |
| TPSA  | 75.63       |    |      |       |       |       |        |        |     |       |
| HBD   | 2           |    |      |       |       |       |        |        |     |       |
| pKa   | 7.90        |    |      |       |       |       |        |        |     |       |
| CNS   | 2.90        |    |      |       |       |       |        |        |     |       |
| MPO   |             |    |      |       |       |       |        |        |     |       |

HLB = hydrophilic-lipophilic balance; logS = water solubility; PL = polarizability( $\text{\AA}^3$ ); Minimal Projection Area ( $\text{\AA}^2$ ); MSA = molecular surface area; RF = Refractivity; HBA = hydrogen bond acceptors; LogBB = blood-brain distribution; ClogP = partitioning; ClogD = distribution at pKa; TPSA = polar surface area; HBD = hydrogen bond donors; CNS MPO = score for CNS penetration.

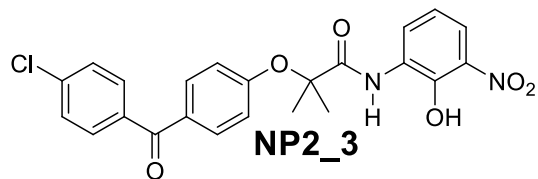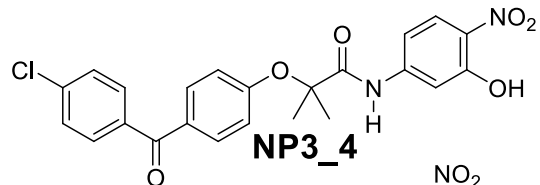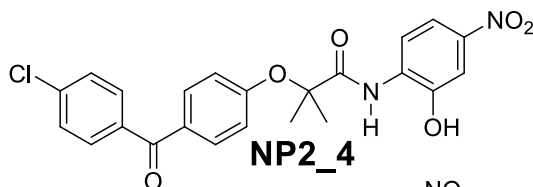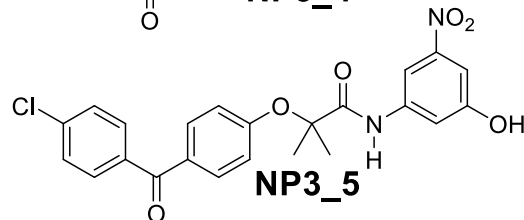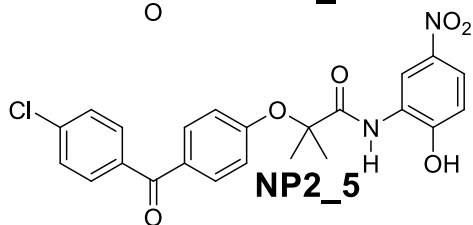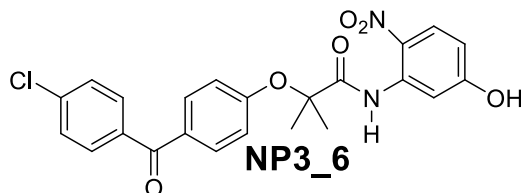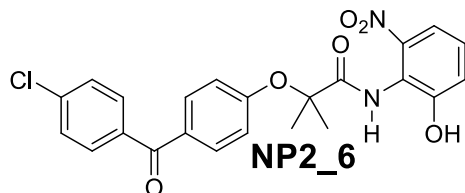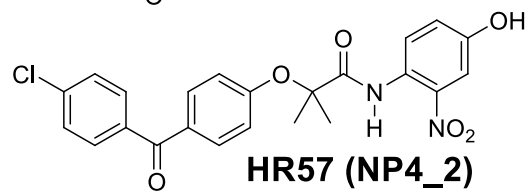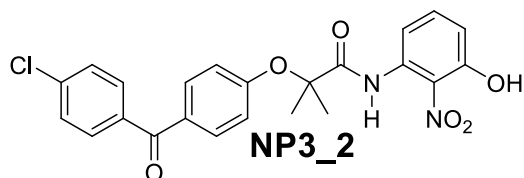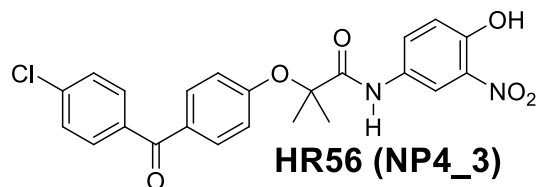

Scheme 3. Nitro hydroxyphenyl **BPA** derivatives (**NP** derivatives)

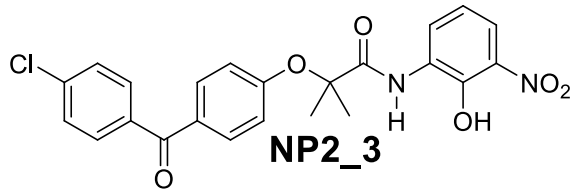

| Calc.      | Marvin 19.4 |      | HLB  | logS  | PL    | MPA   | MSA    | RF     | HBA | LogBB |
|------------|-------------|------|------|-------|-------|-------|--------|--------|-----|-------|
|            |             | T0   | 5.18 | -5.86 | 45.20 | 47.20 | 596.25 | 119.77 | 6   | -0.79 |
| ClogP      | 5.43        | 0    |      |       |       |       |        |        |     |       |
| ClogD      | 4.22        | 0    |      |       |       |       |        |        |     |       |
| MW         | 454.86      | 0.32 |      |       |       |       |        |        |     |       |
| TPSA       | 118.77      | 0.04 |      |       |       |       |        |        |     |       |
| HBD        | 2           |      |      |       |       |       |        |        |     |       |
| pKa        | 6.18        |      |      |       |       |       |        |        |     |       |
| CNS<br>MPO | 1.86        |      |      |       |       |       |        |        |     |       |

HLB = hydrophilic-lipophilic balance; logS = water solubility; PL = polarizability( $\text{\AA}^3$ ); Minimal Projection Area ( $\text{\AA}^2$ ); MSA = molecular surface area; RF = Refractivity; HBA = hydrogen bond acceptors; LogBB = blood-brain distribution; ClogP = partitioning; ClogD = distribution at pKa; TPSA = polar surface area; HBD = hydrogen bond donors; CNS MPO = score for CNS penetration.

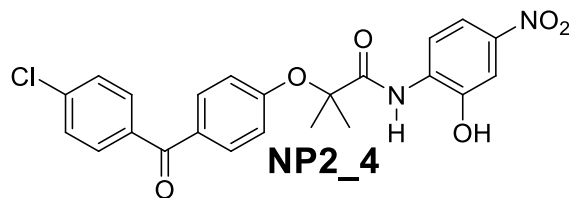

| Calc.      | Marvin 19.4 |      | HLB  | logS  | PL    | MPA   | MSA    | RF     | HBA | LogBB |
|------------|-------------|------|------|-------|-------|-------|--------|--------|-----|-------|
|            |             | T0   | 5.18 | -6.61 | 45.20 | 44.52 | 597.86 | 119.77 | 6   | -0.79 |
| ClogP      | 5.43        | 0    |      |       |       |       |        |        |     |       |
| ClogD      | 4.76        | 0    |      |       |       |       |        |        |     |       |
| MW         | 454.86      | 0.32 |      |       |       |       |        |        |     |       |
| TPSA       | 118.77      | 0.04 |      |       |       |       |        |        |     |       |
| HBD        | 2           | 0.5  |      |       |       |       |        |        |     |       |
| pKa        | 7.19        | 1    |      |       |       |       |        |        |     |       |
| CNS<br>MPO | 1.86        |      |      |       |       |       |        |        |     |       |

HLB = hydrophilic-lipophilic balance; logS = water solubility; PL = polarizability( $\text{\AA}^3$ ); Minimal Projection Area ( $\text{\AA}^2$ ); MSA = molecular surface area; RF = Refractivity; HBA = hydrogen bond acceptors; LogBB = blood-brain distribution; ClogP = partitioning; ClogD = distribution at pKa; TPSA = polar surface area; HBD = hydrogen bond donors; CNS MPO = score for CNS penetration.



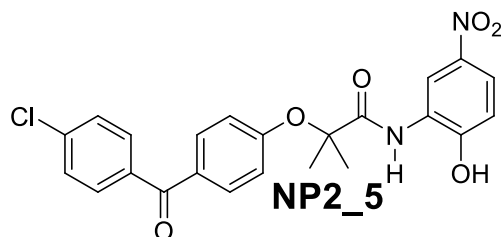

| Calc.      | Marvin 19.4 |      | HLB  | logS  | PL    | MPA   | MSA    | RF     | HBA | LogBB |
|------------|-------------|------|------|-------|-------|-------|--------|--------|-----|-------|
|            |             | T0   | 5.18 | -6.01 | 45.20 | 49.60 | 597.95 | 119.77 | 6   | -0.79 |
| ClogP      | 5.43        | 0    |      |       |       |       |        |        |     |       |
| ClogD      | 4.31        | 0    |      |       |       |       |        |        |     |       |
| MW         | 454.86      | 0.32 |      |       |       |       |        |        |     |       |
| TPSA       | 118.77      | 0.04 |      |       |       |       |        |        |     |       |
| HBD        | 2           | 0.5  |      |       |       |       |        |        |     |       |
| pKa        | 6.38        | 1    |      |       |       |       |        |        |     |       |
| CNS<br>MPO | 1.86        |      |      |       |       |       |        |        |     |       |

HLB = hydrophilic-lipophilic balance; logS = water solubility; PL = polarizability( $\text{\AA}^3$ ); Minimal Projection Area ( $\text{\AA}^2$ ); MSA = molecular surface area; RF = Refractivity; HBA = hydrogen bond acceptors; LogBB = blood-brain distribution; ClogP = partitioning; ClogD = distribution at pKa; TPSA = polar surface area; HBD = hydrogen bond donors; CNS MPO = score for CNS penetration.

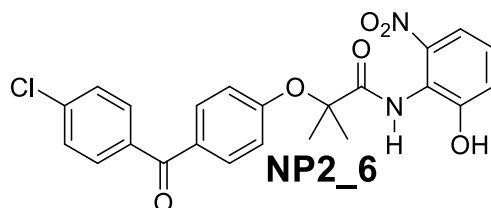

| Calc.      | Marvin 19.4 |      | HLB  | logS  | PL    | MPA   | MSA    | RF     | HBA | LogBB |
|------------|-------------|------|------|-------|-------|-------|--------|--------|-----|-------|
|            |             | T0   | 5.18 | -6.75 | 45.20 | 48.43 | 596.62 | 119.77 | 6   | -0.79 |
| ClogP      | 5.43        | 0    |      |       |       |       |        |        |     |       |
| ClogD      | 5.01        | 0    |      |       |       |       |        |        |     |       |
| MW         | 454.86      | 0.32 |      |       |       |       |        |        |     |       |
| TPSA       | 118.77      | 0.04 |      |       |       |       |        |        |     |       |
| HBD        | 2           | 0.5  |      |       |       |       |        |        |     |       |
| pKa        | 7.34        | 1    |      |       |       |       |        |        |     |       |
| CNS<br>MPO | 1.86        |      |      |       |       |       |        |        |     |       |

HLB = hydrophilic-lipophilic balance; logS = water solubility; PL = polarizability( $\text{\AA}^3$ ); Minimal Projection Area ( $\text{\AA}^2$ ); MSA = molecular surface area; RF = Refractivity; HBA = hydrogen bond acceptors; LogBB = blood-brain distribution; ClogP = partitioning; ClogD = distribution at pKa; TPSA = polar surface area; HBD = hydrogen bond donors; CNS MPO = score for CNS penetration.



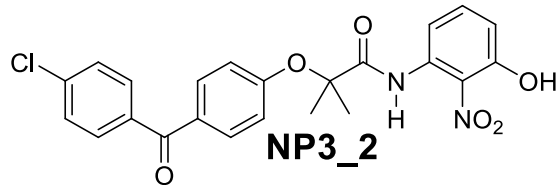

| Calc.   | Marvin 19.4 | HLB  | logS  | PL    | MPA   | MSA    | RF     | HBA | LogBB |
|---------|-------------|------|-------|-------|-------|--------|--------|-----|-------|
|         | T0          | 5.18 | -6.14 | 45.21 | 53.29 | 597.56 | 119.77 | 6   | -0.79 |
| ClogP   | 5.43        | 0    |       |       |       |        |        |     |       |
| ClogD   | 4.49        | 0    |       |       |       |        |        |     |       |
| MW      | 454.86      | 0.32 |       |       |       |        |        |     |       |
| TPSA    | 118.77      | 0.04 |       |       |       |        |        |     |       |
| HBD     | 2           | 0.5  |       |       |       |        |        |     |       |
| pKa     | 6.59        | 1    |       |       |       |        |        |     |       |
| CNS MPO | 1.86        |      |       |       |       |        |        |     |       |

HLB = hydrophilic-lipophilic balance; logS = water solubility; PL = polarizability( $\text{\AA}^3$ ); Minimal Projection Area ( $\text{\AA}^2$ ); MSA = molecular surface area; RF = Refractivity; HBA = hydrogen bond acceptors; LogBB = blood-brain distribution; ClogP = partitioning; ClogD = distribution at pKa; TPSA = polar surface area; HBD = hydrogen bond donors; CNS MPO = score for CNS penetration.

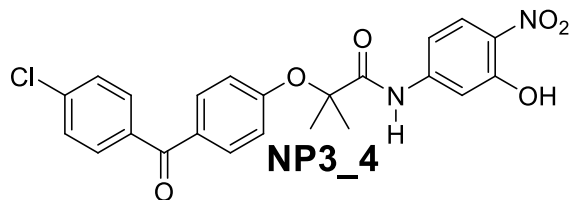

| Calc.   | Marvin 19.4 | HLB  | logS  | PL    | MPA   | MSA    | RF     | HBA | LogBB |
|---------|-------------|------|-------|-------|-------|--------|--------|-----|-------|
|         | T0          | 5.18 | -6.15 | 45.20 | 45.24 | 599.21 | 119.77 | 6   | -0.79 |
| ClogP   | 5.43        | 0    |       |       |       |        |        |     |       |
| ClogD   | 4.45        | 0    |       |       |       |        |        |     |       |
| MW      | 454.86      | 0.32 |       |       |       |        |        |     |       |
| TPSA    | 118.77      | 0.04 |       |       |       |        |        |     |       |
| HBD     | 2           | 0.5  |       |       |       |        |        |     |       |
| pKa     | 6.47        | 1    |       |       |       |        |        |     |       |
| CNS MPO | 1.86        |      |       |       |       |        |        |     |       |

HLB = hydrophilic-lipophilic balance; logS = water solubility; PL = polarizability( $\text{\AA}^3$ ); Minimal Projection Area ( $\text{\AA}^2$ ); MSA = molecular surface area; RF = Refractivity; HBA = hydrogen bond acceptors; LogBB = blood-brain distribution; ClogP = partitioning; ClogD = distribution at pKa; TPSA = polar surface area; HBD = hydrogen bond donors; CNS MPO = score for CNS penetration.

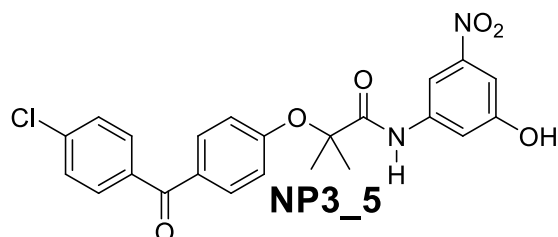

| Calc.   | Marvin 19.4 | HLB  | logS  | PL    | MPA   | MSA    | RF     | HBA | LogBB |
|---------|-------------|------|-------|-------|-------|--------|--------|-----|-------|
|         | T0          | 5.18 | -6.91 | 45.20 | 52.76 | 599.89 | 119.77 | 6   | -0.79 |
| ClogP   | 5.43        | 0    |       |       |       |        |        |     |       |
| ClogD   | 5.11        | 0    |       |       |       |        |        |     |       |
| MW      | 454.86      | 0.32 |       |       |       |        |        |     |       |
| TPSA    | 118.77      | 0.04 |       |       |       |        |        |     |       |
| HBD     | 2           | 0.5  |       |       |       |        |        |     |       |
| pKa     | 7.60        | 1    |       |       |       |        |        |     |       |
| CNS MPO | 1.86        |      |       |       |       |        |        |     |       |

HLB = hydrophilic-lipophilic balance; logS = water solubility; PL = polarizability( $\text{\AA}^3$ ); Minimal Projection Area ( $\text{\AA}^2$ ); MSA = molecular surface area; RF = Refractivity; HBA = hydrogen bond acceptors; LogBB = blood-brain distribution; ClogP = partitioning; ClogD = distribution at pKa; TPSA = polar surface area; HBD = hydrogen bond donors; CNS MPO = score for CNS penetration.

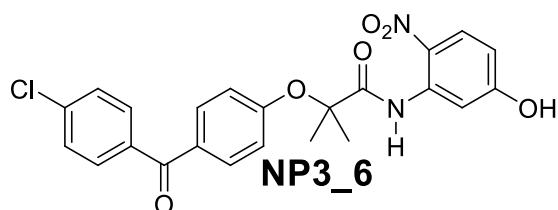

| Calc.   | Marvin 19.4 | HLB  | logS  | PL    | MPA   | MSA    | RF     | HBA | LogBB |
|---------|-------------|------|-------|-------|-------|--------|--------|-----|-------|
|         | T0          | 5.18 | -6.39 | 45.20 | 50.56 | 598.68 | 119.77 | 6   | -0.79 |
| ClogP   | 5.43        | 0    |       |       |       |        |        |     |       |
| ClogD   | 4.68        | 0    |       |       |       |        |        |     |       |
| MW      | 454.86      | 0.32 |       |       |       |        |        |     |       |
| TPSA    | 118.77      | 0.04 |       |       |       |        |        |     |       |
| HBD     | 2           | 0.5  |       |       |       |        |        |     |       |
| pKa     | 6.86        | 1    |       |       |       |        |        |     |       |
| CNS MPO | 1.86        |      |       |       |       |        |        |     |       |

HLB = hydrophilic-lipophilic balance; logS = water solubility; PL = polarizability( $\text{\AA}^3$ ); Minimal Projection Area ( $\text{\AA}^2$ ); MSA = molecular surface area; RF = Refractivity; HBA = hydrogen bond acceptors; LogBB = blood-brain distribution; ClogP = partitioning; ClogD = distribution at pKa; TPSA = polar surface area; HBD = hydrogen bond donors; CNS MPO = score for CNS penetration.



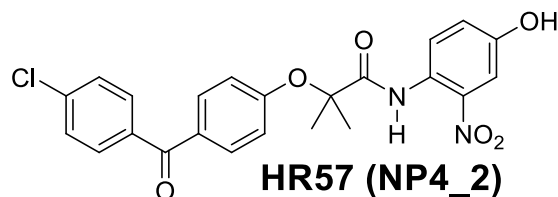

| Calc.      | Marvin 19.4 |      | HLB  | logS  | PL    | MPA   | MSA    | RF     | HBA | LogBB |
|------------|-------------|------|------|-------|-------|-------|--------|--------|-----|-------|
|            |             | T0   |      |       |       |       |        |        |     |       |
|            |             |      | 5.18 | -7.06 | 45.20 | 47.50 | 598.83 | 119.77 | 6   | -0.79 |
| ClogP      | 5.43        | 0    |      |       |       |       |        |        |     |       |
| ClogD      | 5.27        | 0    |      |       |       |       |        |        |     |       |
| MW         | 454.86      | 0.32 |      |       |       |       |        |        |     |       |
| TPSA       | 118.77      | 0.04 |      |       |       |       |        |        |     |       |
| HBD        | 2           | 0.5  |      |       |       |       |        |        |     |       |
| pKa        | 8.0         | 1    |      |       |       |       |        |        |     |       |
| CNS<br>MPO | 1.86        |      |      |       |       |       |        |        |     |       |

HLB = hydrophilic-lipophilic balance; logS = water solubility; PL = polarizability( $\text{\AA}^3$ ); Minimal Projection Area ( $\text{\AA}^2$ ); MSA = molecular surface area; RF = Refractivity; HBA = hydrogen bond acceptors; LogBB = blood-brain distribution; ClogP = partitioning; ClogD = distribution at pKa; TPSA = polar surface area; HBD = hydrogen bond donors; CNS MPO = score for CNS penetration.

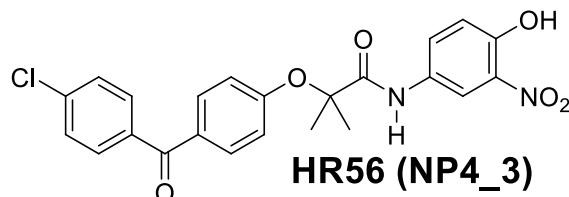

| Calc.      | Marvin 19.4 |      | HLB | logS | PL | MPA | MSA | RF | HBA | LogBB |
|------------|-------------|------|-----|------|----|-----|-----|----|-----|-------|
|            |             | T0   |     |      |    |     |     |    |     |       |
|            |             |      |     |      |    |     |     |    | 6   | -0.79 |
| ClogP      | 5.43        | 0    |     |      |    |     |     |    |     |       |
| ClogD      | 3.94        | 0.03 |     |      |    |     |     |    |     |       |
| MW         | 454.86      | 0.32 |     |      |    |     |     |    |     |       |
| TPSA       | 118.77      | 0.04 |     |      |    |     |     |    |     |       |
| HBD        | 2           | 0.5  |     |      |    |     |     |    |     |       |
| pKa        | 6.72        | 1    |     |      |    |     |     |    |     |       |
| CNS<br>MPO | 1.89        |      |     |      |    |     |     |    |     |       |

HLB = hydrophilic-lipophilic balance; logS = water solubility; PL = polarizability( $\text{\AA}^3$ ); Minimal Projection Area ( $\text{\AA}^2$ ); MSA = molecular surface area; RF = Refractivity; HBA = hydrogen bond acceptors; LogBB = blood-brain distribution; ClogP = partitioning; ClogD = distribution at pKa; TPSA = polar surface area; HBD = hydrogen bond donors; CNS MPO = score for CNS penetration.



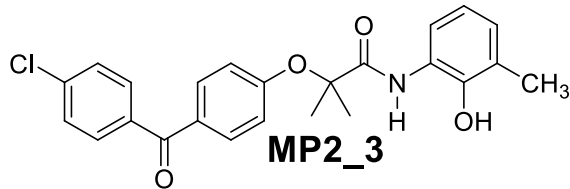

| Calc.      | Marvin 19.20 |      | HLB  | logS  | PL    | MPA   | MSA    | RF     | HBA | LogBB |
|------------|--------------|------|------|-------|-------|-------|--------|--------|-----|-------|
|            |              | T0   | 4.15 | -6.85 | 45.05 | 45.48 | 592.48 | 118.49 | 4   | -0.07 |
| ClogP      | 6.00         | 0    |      |       |       |       |        |        |     |       |
| ClogD      | 5.99         | 0    |      |       |       |       |        |        |     |       |
| MW         | 423.89       | 0.54 |      |       |       |       |        |        |     |       |
| TPSA       | 75.63        | 1    |      |       |       |       |        |        |     |       |
| HBD        | 2            | 0.5  |      |       |       |       |        |        |     |       |
| pKa        | 9.13         | 0.43 |      |       |       |       |        |        |     |       |
| CNS<br>MPO | 2.47         |      |      |       |       |       |        |        |     |       |

HLB = hydrophilic-lipophilic balance; logS = water solubility; PL = polarizability( $\text{\AA}^3$ ); Minimal Projection Area ( $\text{\AA}^2$ ); MSA = molecular surface area; RF = Refractivity; HBA = hydrogen bond acceptors; LogBB = blood-brain distribution; ClogP = partitioning; ClogD = distribution at pKa; TPSA = polar surface area; HBD = hydrogen bond donors; CNS MPO = score for CNS penetration.

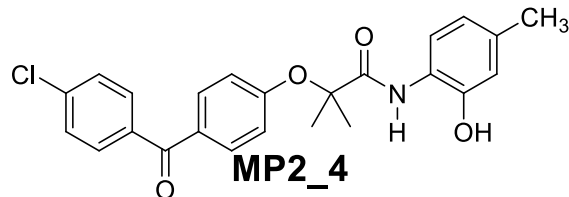

| Calc.      | Marvin 19.20 |      | HLB  | logS  | PL    | MPA   | MSA    | RF     | HBA | LogBB |
|------------|--------------|------|------|-------|-------|-------|--------|--------|-----|-------|
|            |              | T0   | 4.15 | -5.05 | 45.05 | 44.92 | 592.12 | 118.49 | 4   | -0.07 |
| ClogP      | 6.00         | 0    |      |       |       |       |        |        |     |       |
| ClogD      | 5.99         | 0    |      |       |       |       |        |        |     |       |
| MW         | 423.89       | 0.54 |      |       |       |       |        |        |     |       |
| TPSA       | 75.63        | 1    |      |       |       |       |        |        |     |       |
| HBD        | 2            | 0.5  |      |       |       |       |        |        |     |       |
| pKa        | 8.86         | 0.57 |      |       |       |       |        |        |     |       |
| CNS<br>MPO | 2.61         |      |      |       |       |       |        |        |     |       |

HLB = hydrophilic-lipophilic balance; logS = water solubility; PL = polarizability( $\text{\AA}^3$ ); Minimal Projection Area ( $\text{\AA}^2$ ); MSA = molecular surface area; RF = Refractivity; HBA = hydrogen bond acceptors; LogBB = blood-brain distribution; ClogP = partitioning; ClogD = distribution at pKa; TPSA = polar surface area; HBD = hydrogen bond donors; CNS MPO = score for CNS penetration.



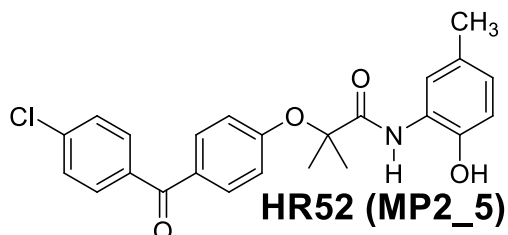

| Calc. | Marvin | 19.20 | HLB  | logS | PL    | MPA   | MSA    | RF     | HBA | LogBB |
|-------|--------|-------|------|------|-------|-------|--------|--------|-----|-------|
|       |        | T0    | 4.15 | 7.08 | 45.05 | 48.18 | 592.67 | 118.49 | 4   | -0.07 |
| ClogP | 6.00   | 0     |      |      |       |       |        |        |     |       |
| ClogD | 5.99   | 0     |      |      |       |       |        |        |     |       |
| MW    | 423.89 | 0.54  |      |      |       |       |        |        |     |       |
| TPSA  | 75.63  | 1     |      |      |       |       |        |        |     |       |
| HBD   | 2      | 0.5   |      |      |       |       |        |        |     |       |
| pKa   | 9.11   | 0.45  |      |      |       |       |        |        |     |       |
| CNS   | 2.49   |       |      |      |       |       |        |        |     |       |
| MPO   |        |       |      |      |       |       |        |        |     |       |

HLB = hydrophilic-lipophilic balance; logS = water solubility; PL = polarizability( $\text{\AA}^3$ ); Minimal Projection Area ( $\text{\AA}^2$ ); MSA = molecular surface area; RF = Refractivity; HBA = hydrogen bond acceptors; LogBB = blood-brain distribution; ClogP = partitioning; ClogD = distribution at pKa; TPSA = polar surface area; HBD = hydrogen bond donors; CNS MPO = score for CNS penetration.

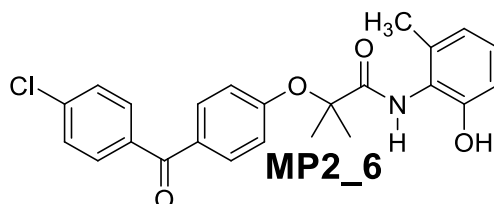

| Calc. | Marvin | 19.20 | HLB  | logS  | PL    | MPA   | MSA    | RF     | HBA | LogBB |
|-------|--------|-------|------|-------|-------|-------|--------|--------|-----|-------|
|       |        | T0    | 4.15 | -6.83 | 45.05 | 50.64 | 591.08 | 118.49 | 4   | -0.07 |
| ClogP | 6.00   | 0     |      |       |       |       |        |        |     |       |
| ClogD | 5.97   | 0     |      |       |       |       |        |        |     |       |
| MW    | 423.89 | 0.54  |      |       |       |       |        |        |     |       |
| TPSA  | 75.63  | 1     |      |       |       |       |        |        |     |       |
| HBD   | 2      | 0.5   |      |       |       |       |        |        |     |       |
| pKa   | 8.89   | 0.55  |      |       |       |       |        |        |     |       |
| CNS   | 2.59   |       |      |       |       |       |        |        |     |       |
| MPO   |        |       |      |       |       |       |        |        |     |       |

HLB = hydrophilic-lipophilic balance; logS = water solubility; PL = polarizability( $\text{\AA}^3$ ); Minimal Projection Area ( $\text{\AA}^2$ ); MSA = molecular surface area; RF = Refractivity; HBA = hydrogen bond acceptors; LogBB = blood-brain distribution; ClogP = partitioning; ClogD = distribution at pKa; TPSA = polar surface area; HBD = hydrogen bond donors; CNS MPO = score for CNS penetration.

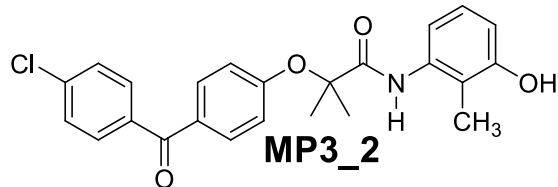

| Calc.      | Marvin 19.20 |      | HLB  | logS  | PL    | MPA   | MSA    | RF     | HBA | LogBB |
|------------|--------------|------|------|-------|-------|-------|--------|--------|-----|-------|
|            |              | T0   | 4.15 | -6.85 | 45.05 | 48.76 | 592.13 | 118.49 | 4   | -0.07 |
| ClogP      | 6.00         | 0    |      |       |       |       |        |        |     |       |
| ClogD      | 5.99         | 0    |      |       |       |       |        |        |     |       |
| MW         | 423.89       | 0.54 |      |       |       |       |        |        |     |       |
| TPSA       | 75.63        | 1    |      |       |       |       |        |        |     |       |
| HBD        | 2            | 0.5  |      |       |       |       |        |        |     |       |
| pKa        | 9.64         | 0.18 |      |       |       |       |        |        |     |       |
| CNS<br>MPO | 2.22         |      |      |       |       |       |        |        |     |       |

HLB = hydrophilic-lipophilic balance; logS = water solubility; PL = polarizability( $\text{\AA}^3$ ); Minimal Projection Area ( $\text{\AA}^2$ ); MSA = molecular surface area; RF = Refractivity; HBA = hydrogen bond acceptors; LogBB = blood-brain distribution; ClogP = partitioning; ClogD = distribution at pKa; TPSA = polar surface area; HBD = hydrogen bond donors; CNS MPO = score for CNS penetration.

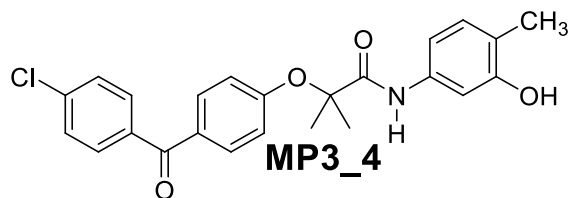

| Calc.      | Marvin 19.20 |      | HLB  | logS  | PL    | MPA   | MSA    | RF     | HBA | LogBB |
|------------|--------------|------|------|-------|-------|-------|--------|--------|-----|-------|
|            |              | T0   | 4.15 | -6.85 | 45.05 | 47.17 | 593.65 | 118.49 | 4   | -0.07 |
| ClogP      | 6.00         | 0    |      |       |       |       |        |        |     |       |
| ClogD      | 5.99         | 0    |      |       |       |       |        |        |     |       |
| MW         | 423.89       | 0.54 |      |       |       |       |        |        |     |       |
| TPSA       | 75.63        | 1    |      |       |       |       |        |        |     |       |
| HBD        | 2            | 0.5  |      |       |       |       |        |        |     |       |
| pKa        | 9.56         | 0.22 |      |       |       |       |        |        |     |       |
| CNS<br>MPO | 2.26         |      |      |       |       |       |        |        |     |       |

HLB = hydrophilic-lipophilic balance; logS = water solubility; PL = polarizability( $\text{\AA}^3$ ); Minimal Projection Area ( $\text{\AA}^2$ ); MSA = molecular surface area; RF = Refractivity; HBA = hydrogen bond acceptors; LogBB = blood-brain distribution; ClogP = partitioning; ClogD = distribution at pKa; TPSA = polar surface area; HBD = hydrogen bond donors; CNS MPO = score for CNS penetration.

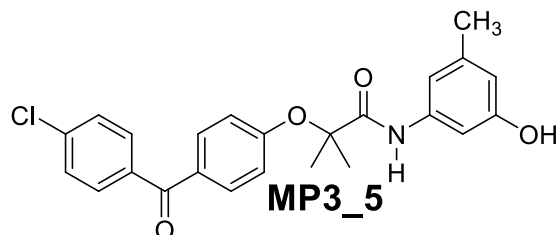

| Calc. | Marvin | 19.20 | HLB  | logS  | PL    | MPA   | MSA    | RF     | HBA | LogBB |
|-------|--------|-------|------|-------|-------|-------|--------|--------|-----|-------|
|       |        | T0    | 4.15 | -7.01 | 45.05 | 50.36 | 594.29 | 118.49 | 4   | -0.07 |
| ClogP | 6.00   | 0     |      |       |       |       |        |        |     |       |
| ClogD | 5.99   | 0     |      |       |       |       |        |        |     |       |
| MW    | 423.89 | 0.54  |      |       |       |       |        |        |     |       |
| TPSA  | 75.63  | 1     |      |       |       |       |        |        |     |       |
| HBD   | 2      | 0.5   |      |       |       |       |        |        |     |       |
| pKa   | 9.35   | 0.33  |      |       |       |       |        |        |     |       |
| CNS   | 2.37   |       |      |       |       |       |        |        |     |       |
| MPO   |        |       |      |       |       |       |        |        |     |       |

HLB = hydrophilic-lipophilic balance; logS = water solubility; PL = polarizability( $\text{\AA}^3$ ); Minimal Projection Area ( $\text{\AA}^2$ ); MSA = molecular surface area; RF = Refractivity; HBA = hydrogen bond acceptors; LogBB = blood-brain distribution; ClogP = partitioning; ClogD = distribution at pKa; TPSA = polar surface area; HBD = hydrogen bond donors; CNS MPO = score for CNS penetration.

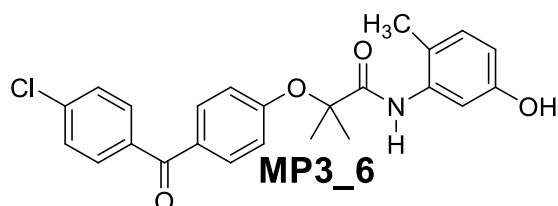

| Calc. | Marvin | 19.20 | HLB  | logS  | PL    | MPA   | MSA    | RF     | HBA | LogBB |
|-------|--------|-------|------|-------|-------|-------|--------|--------|-----|-------|
|       |        | T0    | 4.15 | -6.85 | 45.05 | 46.59 | 593.14 | 118.49 | 4   | -0.07 |
| ClogP | 6.00   | 0     |      |       |       |       |        |        |     |       |
| ClogD | 5.99   | 0     |      |       |       |       |        |        |     |       |
| MW    | 423.89 | 0.54  |      |       |       |       |        |        |     |       |
| TPSA  | 75.63  | 1     |      |       |       |       |        |        |     |       |
| HBD   | 2      | 0.5   |      |       |       |       |        |        |     |       |
| pKa   | 9.63   | 0.18  |      |       |       |       |        |        |     |       |
| CNS   | 2.22   |       |      |       |       |       |        |        |     |       |
| MPO   |        |       |      |       |       |       |        |        |     |       |

HLB = hydrophilic-lipophilic balance; logS = water solubility; PL = polarizability( $\text{\AA}^3$ ); Minimal Projection Area ( $\text{\AA}^2$ ); MSA = molecular surface area; RF = Refractivity; HBA = hydrogen bond acceptors; LogBB = blood-brain distribution; ClogP = partitioning; ClogD = distribution at pKa; TPSA = polar surface area; HBD = hydrogen bond donors; CNS MPO = score for CNS penetration.

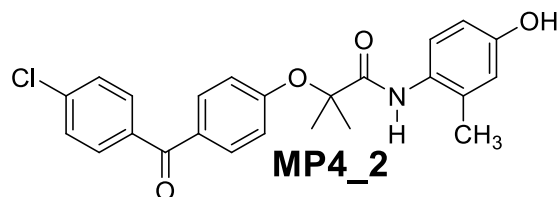

| Calc. | Marvin 19.20 |      | HLB  | logS  | PL    | MPA   | MSA    | RF     | HBA | LogBB |
|-------|--------------|------|------|-------|-------|-------|--------|--------|-----|-------|
|       | T0           |      |      |       |       |       |        |        |     |       |
|       |              |      | 4.15 | -6.85 | 45.05 | 50.75 | 593.60 | 118.49 | 4   | -0.07 |
| ClogP | 6.00         | 0    |      |       |       |       |        |        |     |       |
| ClogD | 5.99         | 0    |      |       |       |       |        |        |     |       |
| MW    | 423.89       | 0.54 |      |       |       |       |        |        |     |       |
| TPSA  | 75.63        | 1    |      |       |       |       |        |        |     |       |
| HBD   | 2            | 0.5  |      |       |       |       |        |        |     |       |
| pKa   | 9.55         | 0.22 |      |       |       |       |        |        |     |       |
| CNS   | 2.26         |      |      |       |       |       |        |        |     |       |
| MPO   |              |      |      |       |       |       |        |        |     |       |

HLB = hydrophilic-lipophilic balance; logS = water solubility; PL = polarizability( $\text{\AA}^3$ ); Minimal Projection Area ( $\text{\AA}^2$ ); MSA = molecular surface area; RF = Refractivity; HBA = hydrogen bond acceptors; LogBB = blood-brain distribution; ClogP = partitioning; ClogD = distribution at pKa; TPSA = polar surface area; HBD = hydrogen bond donors; CNS MPO = score for CNS penetration.

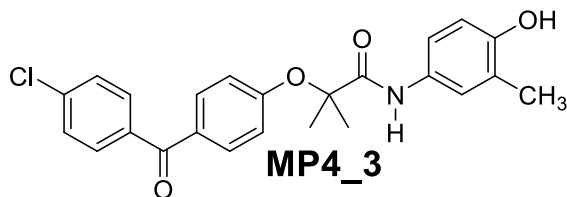

| Calc. | Marvin 19.20 |      | HLB  | logS  | PL    | MPA   | MSA    | RF     | HBA | LogBB |
|-------|--------------|------|------|-------|-------|-------|--------|--------|-----|-------|
|       | T0           |      |      |       |       |       |        |        |     |       |
|       |              |      | 4.15 | -6.86 | 45.05 | 47.40 | 593.41 | 118.49 | 4   | -0.07 |
| ClogP | 6.00         | 0    |      |       |       |       |        |        |     |       |
| ClogD | 6.00         | 0    |      |       |       |       |        |        |     |       |
| MW    | 423.89       | 0.54 |      |       |       |       |        |        |     |       |
| TPSA  | 75.63        | 1    |      |       |       |       |        |        |     |       |
| HBD   | 2            | 0.5  |      |       |       |       |        |        |     |       |
| pKa   | 9.79         | 0.11 |      |       |       |       |        |        |     |       |
| CNS   | 2.15         |      |      |       |       |       |        |        |     |       |
| MPO   |              |      |      |       |       |       |        |        |     |       |

HLB = hydrophilic-lipophilic balance; logS = water solubility; PL = polarizability( $\text{\AA}^3$ ); Minimal Projection Area ( $\text{\AA}^2$ ); MSA = molecular surface area; RF = Refractivity; HBA = hydrogen bond acceptors; LogBB = blood-brain distribution; ClogP = partitioning; ClogD = distribution at pKa; TPSA = polar surface area; HBD = hydrogen bond donors; CNS MPO = score for CNS penetration.

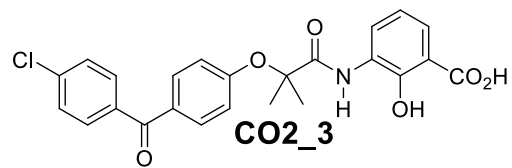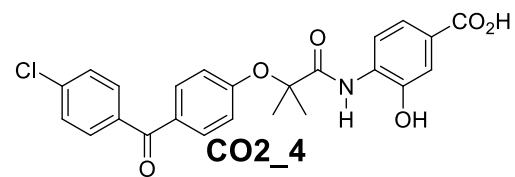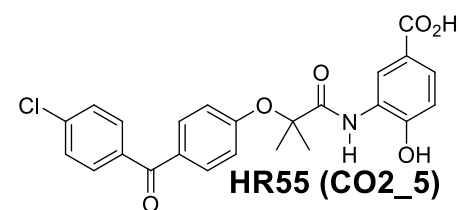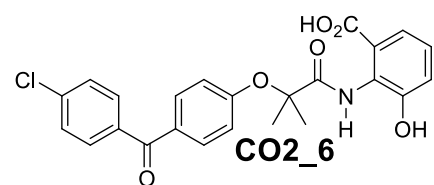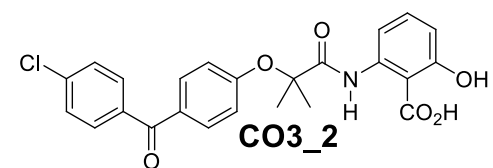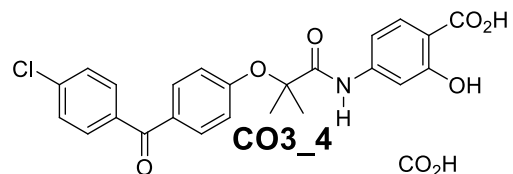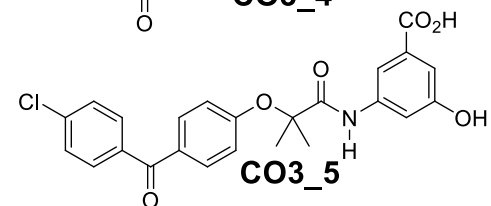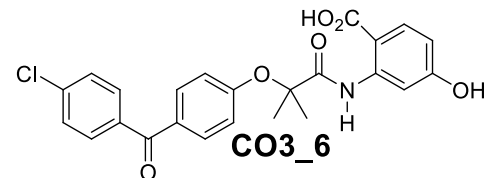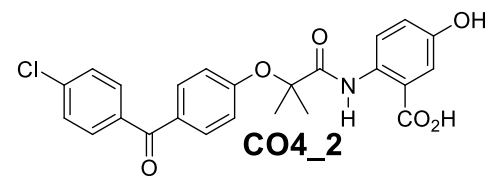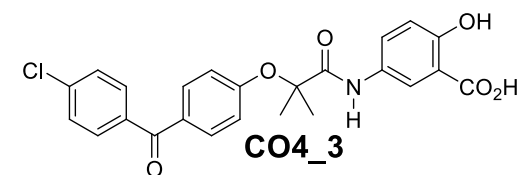

Scheme 5. Carboxylic acid hydroxyphenyl **BPA** derivatives (**CO** derivatives)

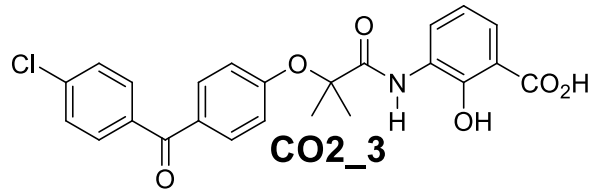

| Calc.   | Marvin 19.20 |      | HLB  | logS  | PL    | MPA   | MSA    | RF     | HBA | LogBB |
|---------|--------------|------|------|-------|-------|-------|--------|--------|-----|-------|
|         |              | T0   | 6.29 | -2.61 | 45.66 | 45.77 | 595.56 | 120.71 | 6   | -0.65 |
| ClogP   | 5.80         | 0    |      |       |       |       |        |        |     |       |
| ClogD   | 2.31         | 0.85 |      |       |       |       |        |        |     |       |
| MW      | 453.88       | 0.33 |      |       |       |       |        |        |     |       |
| TPSA    | 112.93       | 0.24 |      |       |       |       |        |        |     |       |
| HBD     | 3            | 0.17 |      |       |       |       |        |        |     |       |
| pKa     | 2.64         | 1    |      |       |       |       |        |        |     |       |
| CNS MPO | 2.59         |      |      |       |       |       |        |        |     |       |

HLB = hydrophilic-lipophilic balance; logS = water solubility; PL = polarizability( $\text{\AA}^3$ ); Minimal Projection Area ( $\text{\AA}^2$ ); MSA = molecular surface area; RF = Refractivity; HBA = hydrogen bond acceptors; LogBB = blood-brain distribution; ClogP = partitioning; ClogD = distribution at pKa; TPSA = polar surface area; HBD = hydrogen bond donors; CNS MPO = score for CNS penetration.

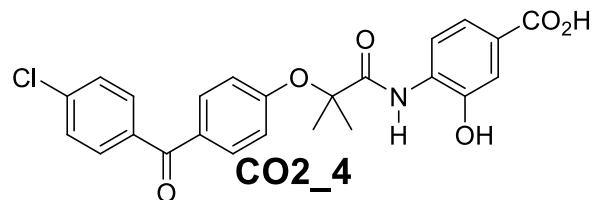

| Calc.   | Marvin 19.20 |    | HLB  | logS  | PL    | MPA   | MSA    | RF     | HBA | LogBB |
|---------|--------------|----|------|-------|-------|-------|--------|--------|-----|-------|
|         |              | T0 | 6.29 | -2.98 | 45.65 | 46.63 | 596.93 | 120.71 | 6   | -0.75 |
| ClogP   | 5.15         |    |      |       |       |       |        |        |     |       |
| ClogD   | 1.93         |    |      |       |       |       |        |        |     |       |
| MW      | 453.88       |    |      |       |       |       |        |        |     |       |
| TPSA    | 112.93       |    |      |       |       |       |        |        |     |       |
| HBD     | 3            |    |      |       |       |       |        |        |     |       |
| pKa     | 3.95         |    |      |       |       |       |        |        |     |       |
| CNS MPO | 2.74         |    |      |       |       |       |        |        |     |       |

HLB = hydrophilic-lipophilic balance; logS = water solubility; PL = polarizability( $\text{\AA}^3$ ); Minimal Projection Area ( $\text{\AA}^2$ ); MSA = molecular surface area; RF = Refractivity; HBA = hydrogen bond acceptors; LogBB = blood-brain distribution; ClogP = partitioning; ClogD = distribution at pKa; TPSA = polar surface area; HBD = hydrogen bond donors; CNS MPO = score for CNS penetration.

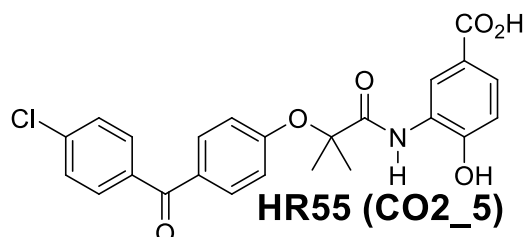

| Calc. | Marvin | 19.20 | HLB  | logS  | PL    | MPA   | MSA    | RF     | HBA | LogBB |
|-------|--------|-------|------|-------|-------|-------|--------|--------|-----|-------|
|       |        | T0    | 6.29 | -3.26 | 45.65 | 52.16 | 597.96 | 120.71 | 6   | -0.75 |
| ClogP | 5.15   | 0     |      |       |       |       |        |        |     |       |
| ClogD | 2.04   | 0.98  |      |       |       |       |        |        |     |       |
| MW    | 453.88 | 0.33  |      |       |       |       |        |        |     |       |
| TPSA  | 112.93 | 0.24  |      |       |       |       |        |        |     |       |
| HBD   | 3      | 0.17  |      |       |       |       |        |        |     |       |
| pKa   | 4.23   | 1     |      |       |       |       |        |        |     |       |
| CNS   | 2.72   |       |      |       |       |       |        |        |     |       |
| MPO   |        |       |      |       |       |       |        |        |     |       |

HLB = hydrophilic-lipophilic balance; logS = water solubility; PL = polarizability( $\text{\AA}^3$ ); Minimal Projection Area ( $\text{\AA}^2$ ); MSA = molecular surface area; RF = Refractivity; HBA = hydrogen bond acceptors; LogBB = blood-brain distribution; ClogP = partitioning; ClogD = distribution at pKa; TPSA = polar surface area; HBD = hydrogen bond donors; CNS MPO = score for CNS penetration.

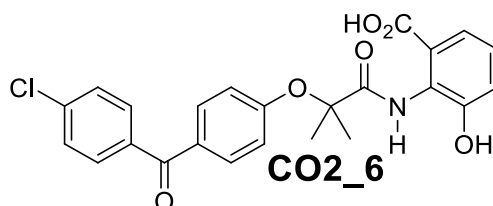

| Calc. | Marvin | 19.20 | HLB  | logS  | PL    | MPA   | MSA    | RF     | HBA | LogBB |
|-------|--------|-------|------|-------|-------|-------|--------|--------|-----|-------|
|       |        | T0    | 6.29 | -2.43 | 45.65 | 53.49 | 595.63 | 120.71 | 6   | -0.65 |
| ClogP | 5.80   | 0     |      |       |       |       |        |        |     |       |
| ClogD | 2.41   | 0.79  |      |       |       |       |        |        |     |       |
| MW    | 453.88 | 0.33  |      |       |       |       |        |        |     |       |
| TPSA  | 112.93 | 0.24  |      |       |       |       |        |        |     |       |
| HBD   | 3      | 0.17  |      |       |       |       |        |        |     |       |
| pKa   | 3.34   | 1     |      |       |       |       |        |        |     |       |
| CNS   | 2.53   |       |      |       |       |       |        |        |     |       |
| MPO   |        |       |      |       |       |       |        |        |     |       |

HLB = hydrophilic-lipophilic balance; logS = water solubility; PL = polarizability( $\text{\AA}^3$ ); Minimal Projection Area ( $\text{\AA}^2$ ); MSA = molecular surface area; RF = Refractivity; HBA = hydrogen bond acceptors; LogBB = blood-brain distribution; ClogP = partitioning; ClogD = distribution at pKa; TPSA = polar surface area; HBD = hydrogen bond donors; CNS MPO = score for CNS penetration.

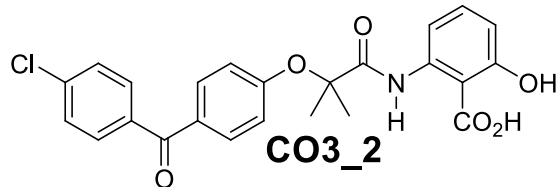

| Calc.      | Marvin 19.20 |      | HLB  | logS  | PL    | MPA   | MSA    | RF     | HBA | LogBB |
|------------|--------------|------|------|-------|-------|-------|--------|--------|-----|-------|
|            |              | T0   | 6.29 | -1.25 | 45.66 | 54.17 | 596.61 | 120.71 | 6   | -0.55 |
| ClogP      | 6.45         | 0    |      |       |       |       |        |        |     |       |
| ClogD      | 2.93         | 0.53 |      |       |       |       |        |        |     |       |
| MW         | 453.88       | 0.33 |      |       |       |       |        |        |     |       |
| TPSA       | 112.93       | 0.24 |      |       |       |       |        |        |     |       |
| HBD        | 3            | 0.17 |      |       |       |       |        |        |     |       |
| pKa        | 2.27         | 1    |      |       |       |       |        |        |     |       |
| CNS<br>MPO | 2.27         |      |      |       |       |       |        |        |     |       |

HLB = hydrophilic-lipophilic balance; logS = water solubility; PL = polarizability( $\text{\AA}^3$ ); Minimal Projection Area ( $\text{\AA}^2$ ); MSA = molecular surface area; RF = Refractivity; HBA = hydrogen bond acceptors; LogBB = blood-brain distribution; ClogP = partitioning; ClogD = distribution at pKa; TPSA = polar surface area; HBD = hydrogen bond donors; CNS MPO = score for CNS penetration.

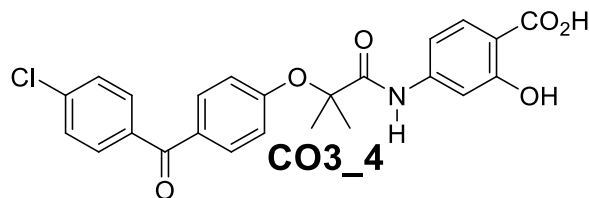

| Calc.      | Marvin 19.20 |      | HLB  | logS  | PL    | MPA   | MSA    | RF     | HBA | LogBB |
|------------|--------------|------|------|-------|-------|-------|--------|--------|-----|-------|
|            |              | T0   | 6.29 | -1.98 | 45.65 | 44.91 | 597.97 | 120.71 | 6   | -0.65 |
| ClogP      | 5.80         | 0    |      |       |       |       |        |        |     |       |
| ClogD      | 2.32         | 0.84 |      |       |       |       |        |        |     |       |
| MW         | 453.88       | 0.33 |      |       |       |       |        |        |     |       |
| TPSA       | 112.93       | 0.24 |      |       |       |       |        |        |     |       |
| HBD        | 3            | 0.17 |      |       |       |       |        |        |     |       |
| pKa        | 2.87         | 1    |      |       |       |       |        |        |     |       |
| CNS<br>MPO | 2.58         |      |      |       |       |       |        |        |     |       |

HLB = hydrophilic-lipophilic balance; logS = water solubility; PL = polarizability( $\text{\AA}^3$ ); Minimal Projection Area ( $\text{\AA}^2$ ); MSA = molecular surface area; RF = Refractivity; HBA = hydrogen bond acceptors; LogBB = blood-brain distribution; ClogP = partitioning; ClogD = distribution at pKa; TPSA = polar surface area; HBD = hydrogen bond donors; CNS MPO = score for CNS penetration.



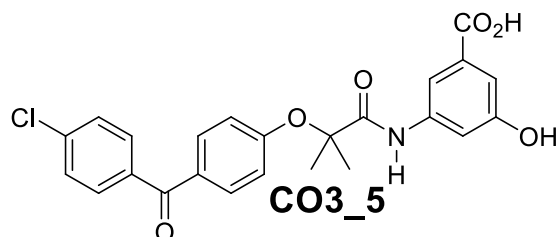

| Calc. | Marvin | 19.20 | HLB  | logS  | PL    | MPA   | MSA    | RF     | HBA | LogBB |
|-------|--------|-------|------|-------|-------|-------|--------|--------|-----|-------|
|       |        | T0    | 6.29 | -3.78 | 45.65 | 51.61 | 599.40 | 120.71 | 6   | -0.75 |
| ClogP | 5.15   | 0     |      |       |       |       |        |        |     |       |
| ClogD | 1.88   | 1     |      |       |       |       |        |        |     |       |
| MW    | 453.88 | 0.33  |      |       |       |       |        |        |     |       |
| TPSA  | 112.93 | 0.24  |      |       |       |       |        |        |     |       |
| HBD   | 3      | 0.17  |      |       |       |       |        |        |     |       |
| pKa   | 3.69   | 1     |      |       |       |       |        |        |     |       |
| CNS   | 2.74   |       |      |       |       |       |        |        |     |       |
| MPO   |        |       |      |       |       |       |        |        |     |       |

HLB = hydrophilic-lipophilic balance; logS = water solubility; PL = polarizability( $\text{\AA}^3$ ); Minimal Projection Area ( $\text{\AA}^2$ ); MSA = molecular surface area; RF = Refractivity; HBA = hydrogen bond acceptors; LogBB = blood-brain distribution; ClogP = partitioning; ClogD = distribution at pKa; TPSA = polar surface area; HBD = hydrogen bond donors; CNS MPO = score for CNS penetration.

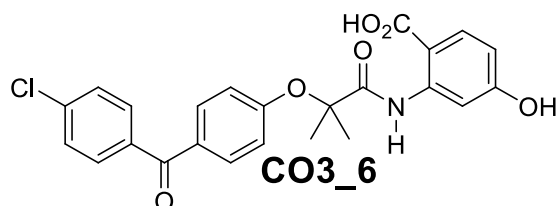

| Calc. | Marvin | 19.20 | HLB  | logS  | PL    | MPA   | MSA    | RF     | HBA | LogBB |
|-------|--------|-------|------|-------|-------|-------|--------|--------|-----|-------|
|       |        | T0    | 6.29 | -2.96 | 45.65 | 51.97 | 597.32 | 120.71 | 6   | -0.65 |
| ClogP | 5.80   | 0     |      |       |       |       |        |        |     |       |
| ClogD | 3.59   | 0.21  |      |       |       |       |        |        |     |       |
| MW    | 453.88 | 0.33  |      |       |       |       |        |        |     |       |
| TPSA  | 112.93 | 0.24  |      |       |       |       |        |        |     |       |
| HBD   | 3      | 0.17  |      |       |       |       |        |        |     |       |
| pKa   | 3.87   | 1     |      |       |       |       |        |        |     |       |
| CNS   | 1.95   |       |      |       |       |       |        |        |     |       |
| MPO   |        |       |      |       |       |       |        |        |     |       |

HLB = hydrophilic-lipophilic balance; logS = water solubility; PL = polarizability( $\text{\AA}^3$ ); Minimal Projection Area ( $\text{\AA}^2$ ); MSA = molecular surface area; RF = Refractivity; HBA = hydrogen bond acceptors; LogBB = blood-brain distribution; ClogP = partitioning; ClogD = distribution at pKa; TPSA = polar surface area; HBD = hydrogen bond donors; CNS MPO = score for CNS penetration.

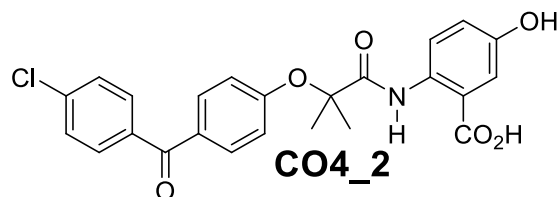

| Calc.   | Marvin 19.20 |      | HLB  | logS  | PL    | MPA   | MSA    | RF     | HBA | LogBB |
|---------|--------------|------|------|-------|-------|-------|--------|--------|-----|-------|
|         | T0           |      |      |       |       |       |        |        |     |       |
|         |              |      | 6.29 | -2.38 | 45.65 | 54.80 | 597.78 | 120.71 | 6   | -0.65 |
| ClogP   | 5.80         | 0    |      |       |       |       |        |        |     |       |
| ClogD   | 2.38         | 0.81 |      |       |       |       |        |        |     |       |
| MW      | 453.88       | 0.33 |      |       |       |       |        |        |     |       |
| TPSA    | 112.93       | 0.24 |      |       |       |       |        |        |     |       |
| HBD     | 3            | 0.17 |      |       |       |       |        |        |     |       |
| pKa     | 3.31         | 1    |      |       |       |       |        |        |     |       |
| CNS MPO | 2.55         |      |      |       |       |       |        |        |     |       |

HLB = hydrophilic-lipophilic balance; logS = water solubility; PL = polarizability( $\text{\AA}^3$ ); Minimal Projection Area ( $\text{\AA}^2$ ); MSA = molecular surface area; RF = Refractivity; HBA = hydrogen bond acceptors; LogBB = blood-brain distribution; ClogP = partitioning; ClogD = distribution at pKa; TPSA = polar surface area; HBD = hydrogen bond donors; CNS MPO = score for CNS penetration.

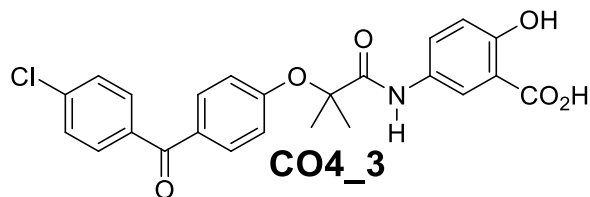

| Calc.   | Marvin 19.20 |      | HLB  | logS  | PL    | MPA   | MSA    | RF     | HBA | LogBB |
|---------|--------------|------|------|-------|-------|-------|--------|--------|-----|-------|
|         | T0           |      |      |       |       |       |        |        |     |       |
|         |              |      | 6.29 | -1.71 | 45.65 | 51.80 | 597.59 | 120.71 | 6   | -0.65 |
| ClogP   | 5.80         | 0    |      |       |       |       |        |        |     |       |
| ClogD   | 2.29         | 0.86 |      |       |       |       |        |        |     |       |
| MW      | 453.88       | 0.33 |      |       |       |       |        |        |     |       |
| TPSA    | 112.93       | 0.24 |      |       |       |       |        |        |     |       |
| HBD     | 3            | 0.17 |      |       |       |       |        |        |     |       |
| pKa     | 2.61         | 1    |      |       |       |       |        |        |     |       |
| CNS MPO | 2.60         |      |      |       |       |       |        |        |     |       |

HLB = hydrophilic-lipophilic balance; logS = water solubility; PL = polarizability( $\text{\AA}^3$ ); Minimal Projection Area ( $\text{\AA}^2$ ); MSA = molecular surface area; RF = Refractivity; HBA = hydrogen bond acceptors; LogBB = blood-brain distribution; ClogP = partitioning; ClogD = distribution at pKa; TPSA = polar surface area; HBD = hydrogen bond donors; CNS MPO = score for CNS penetration.

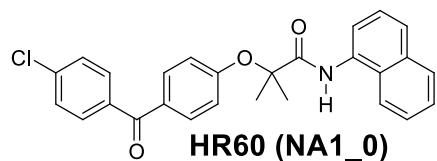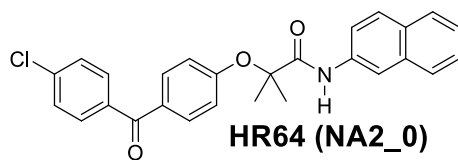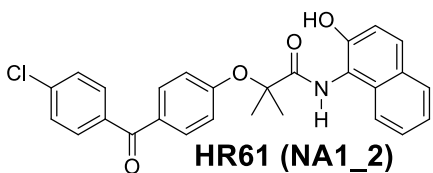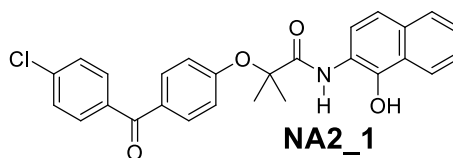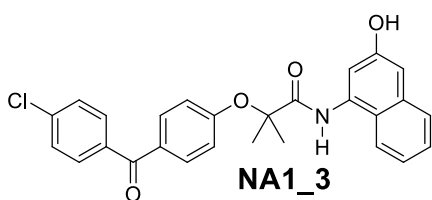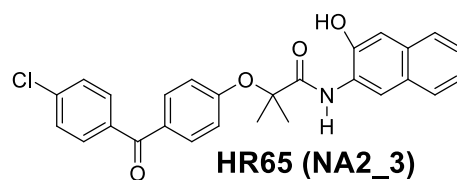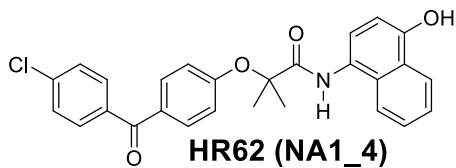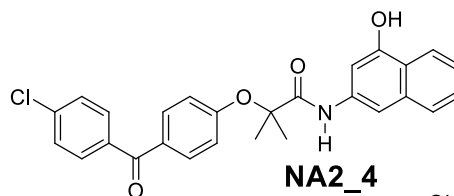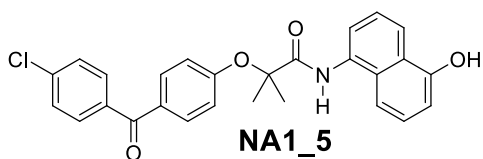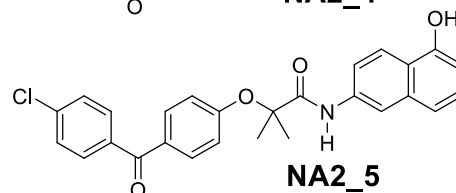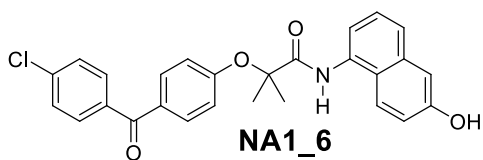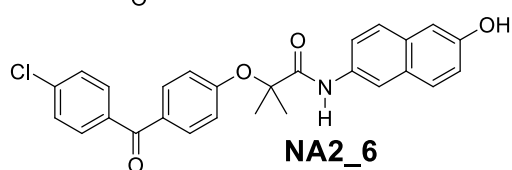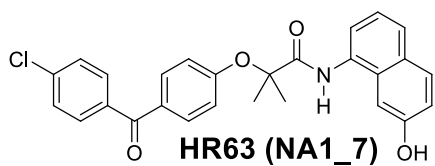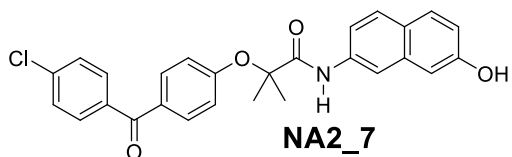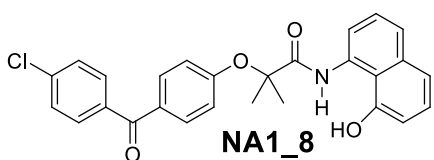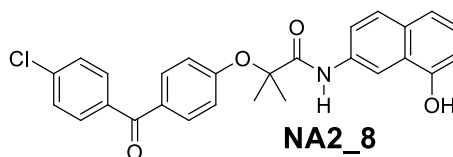

Scheme 6. Hydroxynaphthalene BPA derivatives (NA derivatives)

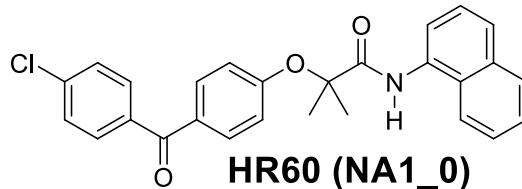

| Calc.   | Marvin 19.4 |      | HLB  | logS  | PL    | MPA   | MSA    | RF     | HBA | LogBB |
|---------|-------------|------|------|-------|-------|-------|--------|--------|-----|-------|
|         | T0          |      |      |       |       |       |        |        |     |       |
|         |             |      | 3.04 | -8.79 | 50.20 | 50.10 | 612.55 | 127.92 | 3   | 0.35  |
| ClogP   | 6.78        | 0    |      |       |       |       |        |        |     |       |
| ClogD   | 6.78        | 0    |      |       |       |       |        |        |     |       |
| MW      | 443.92      | 0.4  |      |       |       |       |        |        |     |       |
| TPSA    | 55.40       | 1    |      |       |       |       |        |        |     |       |
| HBD     | 1           | 0.83 |      |       |       |       |        |        |     |       |
| pKa     | 12.22       | 0    |      |       |       |       |        |        |     |       |
| CNS MPO | 2.23        |      |      |       |       |       |        |        |     |       |

HLB = hydrophilic-lipophilic balance; logS = water solubility; PL = polarizability( $\text{\AA}^3$ ); Minimal Projection Area ( $\text{\AA}^2$ ); MSA = molecular surface area; RF = Refractivity; HBA = hydrogen bond acceptors; LogBB = blood-brain distribution; ClogP = partitioning; ClogD = distribution at pKa; TPSA = polar surface area; HBD = hydrogen bond donors; CNS MPO = score for CNS penetration.

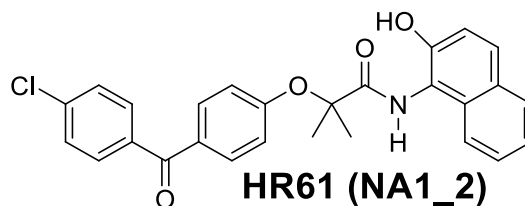

| Calc.   | Marvin 19.4 |      | HLB  | logS  | PL    | MPA   | MSA    | RF     | HBA | LogBB |
|---------|-------------|------|------|-------|-------|-------|--------|--------|-----|-------|
|         | T0          |      |      |       |       |       |        |        |     |       |
|         |             |      | 3.07 | -8.28 | 50.79 | 48.22 | 622.51 | 129.90 | 4   | 0.01  |
| ClogP   | 6.48        | 0    |      |       |       |       |        |        |     |       |
| ClogD   | 6.41        | 0    |      |       |       |       |        |        |     |       |
| MW      | 459.92      | 0.29 |      |       |       |       |        |        |     |       |
| TPSA    | 75.63       | 1    |      |       |       |       |        |        |     |       |
| HBD     | 2           | 0.5  |      |       |       |       |        |        |     |       |
| pKa     | 8.56        | 0.72 |      |       |       |       |        |        |     |       |
| CNS MPO | 2.51        |      |      |       |       |       |        |        |     |       |

HLB = hydrophilic-lipophilic balance; PL = polarizability( $\text{\AA}^3$ ); Minimal Projection Area ( $\text{\AA}^2$ ); RF = Refractivity

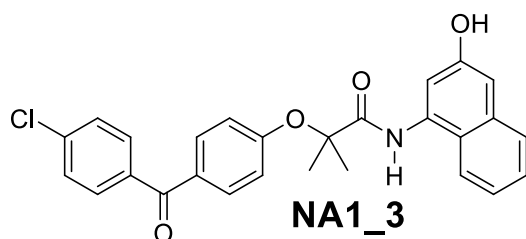

| Calc.   | Marvin 19.20 | HLB  | logS  | PL    | MPA   | MSA    | RF     | HBA | LogBB |
|---------|--------------|------|-------|-------|-------|--------|--------|-----|-------|
|         | T0           | 3.07 | -8.33 | 50.79 | 53.01 | 623.53 | 129.90 | 4   | 0.004 |
| ClogP   | 6.48         | 0    |       |       |       |        |        |     |       |
| ClogD   | 6.48         | 0    |       |       |       |        |        |     |       |
| MW      | 459.92       | 0.29 |       |       |       |        |        |     |       |
| PSA     | 75.63        | 1    |       |       |       |        |        |     |       |
| HBD     | 2            | 0.5  |       |       |       |        |        |     |       |
| pKa     | 9.01         | 1    |       |       |       |        |        |     |       |
| CNS MPO | 2.29         |      |       |       |       |        |        |     |       |

ClogP = calculated partitioning; HLB = hydrophilic-lipophilic balance; logS = water solubility; PL = polarizability( $\text{\AA}^3$ ); RF = Refractivity; HBD = hydrogen bond donor at pH = 7; HBA = hydrogen bond acceptor at pH =7; logBB = calculated blood-brain partition; PSA = Polar surface area ( $\text{\AA}^2$ ); MPA = Minimal projection area ( $\text{\AA}^2$ ); LogS = Aqueous solubility (mg/ml); MPO = Central nervous system multiparameter optimization (CNS MPO).

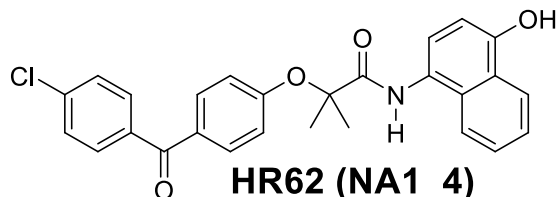

| Calc.   | Marvin 19.20 | HLB  | logS  | PL    | MPA   | MSA    | RF     | HBA | LogBB |
|---------|--------------|------|-------|-------|-------|--------|--------|-----|-------|
|         | T0           | 3.07 | -8.33 | 50.79 | 50.50 | 623.01 | 129.90 | 4   | 0.004 |
| ClogP   | 6.48         | 0    |       |       |       |        |        |     |       |
| ClogD   | 6.48         | 0    |       |       |       |        |        |     |       |
| MW      | 459.92       | 0.29 |       |       |       |        |        |     |       |
| PSA     | 75.63        | 1    |       |       |       |        |        |     |       |
| HBD     | 2            | 0.5  |       |       |       |        |        |     |       |
| pKa     | 9.06         | 0.47 |       |       |       |        |        |     |       |
| CNS MPO | 2.26         |      |       |       |       |        |        |     |       |

ClogP = calculated partitioning; HLB = hydrophilic-lipophilic balance; logS = water solubility; PL = polarizability( $\text{\AA}^3$ ); RF = Refractivity; HBD = hydrogen bond donor at pH = 7; HBA = hydrogen bond acceptor at pH =7; logBB = calculated blood-brain partition; PSA = Polar surface area ( $\text{\AA}^2$ ); MPA = Minimal projection area ( $\text{\AA}^2$ ); LogS = Aqueous solubility (mg/ml); MPO = Central nervous system multiparameter optimization (CNS MPO).

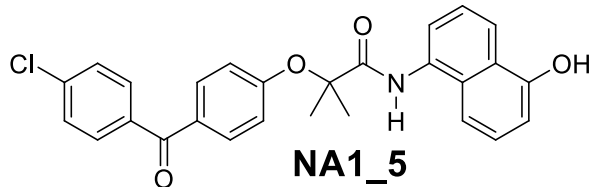

| Calc.   | Marvin 19.20 |      | HLB  | logS  | PL    | MPA   | MSA    | RF     | HBA | LogBB |
|---------|--------------|------|------|-------|-------|-------|--------|--------|-----|-------|
|         |              | T0   | 3.07 | -8.33 | 50.79 | 50.07 | 621.47 | 129.90 | 4   | 0.004 |
| ClogP   | 6.48         | 0    |      |       |       |       |        |        |     |       |
| ClogD   | 6.48         | 0    |      |       |       |       |        |        |     |       |
| MW      | 459.92       | 0.29 |      |       |       |       |        |        |     |       |
| PSA     | 75.63        | 1    |      |       |       |       |        |        |     |       |
| HBD     | 2            | 0.5  |      |       |       |       |        |        |     |       |
| pKa     | 9.54         | 0.23 |      |       |       |       |        |        |     |       |
| CNS MPO | 2.02         |      |      |       |       |       |        |        |     |       |

ClogP = calculated partitioning; HLB = hydrophilic-lipophilic balance; logS = water solubility; PL = polarizability( $\text{\AA}^3$ ); RF = Refractivity; HBD = hydrogen bond donor at pH = 7; HBA = hydrogen bond acceptor at pH =7; logBB = calculated blood-brain partition; PSA = Polar surface area ( $\text{\AA}^2$ ); MPA = Minimal projection area ( $\text{\AA}^2$ ); LogS = Aqueous solubility (mg/ml); MPO = Central nervous system multiparameter optimization (CNS MPO).

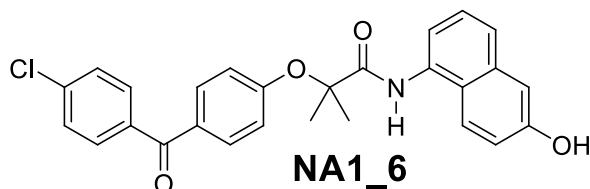

| Calc.   | Marvin 19.20 |      | HLB  | logS  | PL    | MPA   | MSA    | RF     | HBA | LogBB |
|---------|--------------|------|------|-------|-------|-------|--------|--------|-----|-------|
|         |              | T0   | 3.07 | -8.30 | 50.78 | 51.67 | 622.43 | 129.90 | 4   | 0.004 |
| ClogP   | 6.48         | 0    |      |       |       |       |        |        |     |       |
| ClogD   | 6.48         | 0    |      |       |       |       |        |        |     |       |
| MW      | 459.92       | 0.29 |      |       |       |       |        |        |     |       |
| PSA     | 75.63        | 1    |      |       |       |       |        |        |     |       |
| HBD     | 2            | 0.5  |      |       |       |       |        |        |     |       |
| pKa     | 9.76         | 0.23 |      |       |       |       |        |        |     |       |
| CNS MPO | 1.91         |      |      |       |       |       |        |        |     |       |

ClogP = calculated partitioning; HLB = hydrophilic-lipophilic balance; logS = water solubility; PL = polarizability( $\text{\AA}^3$ ); RF = Refractivity; HBD = hydrogen bond donor at pH = 7; HBA = hydrogen bond acceptor at pH =7; logBB = calculated blood-brain partition; PSA = Polar surface area ( $\text{\AA}^2$ ); MPA = Minimal projection area ( $\text{\AA}^2$ ); LogS = Aqueous solubility (mg/ml); MPO = Central nervous system multiparameter optimization (CNS MPO).

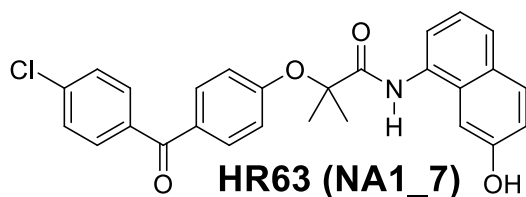

| Calc.   | Marvin 19.20 | HLB  | logS  | PL    | MPA   | MSA    | RF        | HBA | LogBB |
|---------|--------------|------|-------|-------|-------|--------|-----------|-----|-------|
|         | T0           | 3.07 | -8.30 | 50.78 | 53.68 | 623.34 | 129.901.9 | 4   | 0.004 |
| ClogP   | 6.48         | 0    |       |       |       |        |           |     |       |
| ClogD   | 6.48         | 0    |       |       |       |        |           |     |       |
| MW      | 459.92       | 0.29 |       |       |       |        |           |     |       |
| PSA     | 75.63        | 1    |       |       |       |        |           |     |       |
| HBD     | 2            | 0.5  |       |       |       |        |           |     |       |
| pKa     | 9.71         | 0.14 |       |       |       |        |           |     |       |
| CNS MPO | 1.93         |      |       |       |       |        |           |     |       |

ClogP = calculated partitioning; HLB = hydrophilic-lipophilic balance; logS = water solubility; PL = polarizability( $\text{\AA}^3$ ); RF = Refractivity; HBD = hydrogen bond donor at pH = 7; HBA = hydrogen bond acceptor at pH =7; logBB = calculated blood-brain partition; PSA = Polar surface area ( $\text{\AA}^2$ ); MPA = Minimal projection area ( $\text{\AA}^2$ ); LogS = Aqueous solubility (mg/ml); MPO = Central nervous system multiparameter optimization (CNS MPO).

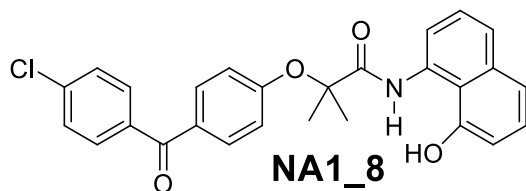

| Calc.   | Marvin 19.20 | HLB  | logS  | PL    | MPA   | MSA    | RF     | HBA | LogBB |
|---------|--------------|------|-------|-------|-------|--------|--------|-----|-------|
|         | T0           | 3.07 | -8.30 | 50.79 | 50.57 | 621.76 | 129.90 | 4   | 0.004 |
| ClogP   | 6.48         | 0    |       |       |       |        |        |     |       |
| ClogD   | 6.48         | 0    |       |       |       |        |        |     |       |
| MW      | 459.92       | 0.29 |       |       |       |        |        |     |       |
| PSA     | 75.63        | 1    |       |       |       |        |        |     |       |
| HBD     | 2            | 0.5  |       |       |       |        |        |     |       |
| pKa     | 9.31         | 0.34 |       |       |       |        |        |     |       |
| CNS MPO | 2.13         |      |       |       |       |        |        |     |       |

ClogP = calculated partitioning; HLB = hydrophilic-lipophilic balance; logS = water solubility; PL = polarizability( $\text{\AA}^3$ ); RF = Refractivity; HBD = hydrogen bond donor at pH = 7; HBA = hydrogen bond acceptor at pH =7; logBB = calculated blood-brain partition; PSA = Polar surface area ( $\text{\AA}^2$ ); MPA = Minimal projection area ( $\text{\AA}^2$ ); LogS = Aqueous solubility (mg/ml); MPO = Central nervous system multiparameter optimization (CNS MPO).

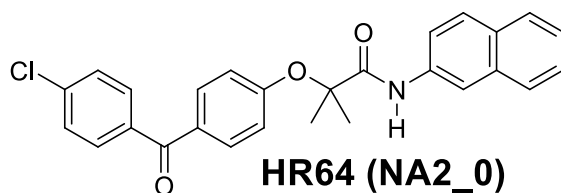

**HR64 (NA2\_0)**

| Calc.   | Marvin 19.20 |      | HLB  | logS  | PL    | MPA   | MSA    | RF     | HBA | LogBB |
|---------|--------------|------|------|-------|-------|-------|--------|--------|-----|-------|
|         |              | T0   | 3.04 | -8.79 | 50.20 | 50.72 | 613.44 | 127.92 | 3   | 0.35  |
| ClogP   | 6.78         | 0    |      |       |       |       |        |        |     |       |
| ClogD   | 6.78         | 0    |      |       |       |       |        |        |     |       |
| MW      | 443.93       | 0.4  |      |       |       |       |        |        |     |       |
| PSA     | 55.40        | 1    |      |       |       |       |        |        |     |       |
| HBD     | 1            | 0.83 |      |       |       |       |        |        |     |       |
| pKa     | 12.64        | 0    |      |       |       |       |        |        |     |       |
| CNS MPO | 2.23         |      |      |       |       |       |        |        |     |       |

ClogP = calculated partitioning; HLB = hydrophilic-lipophilic balance; logS = water solubility; PL = polarizability( $\text{\AA}^3$ ); RF = Refractivity; HBD = hydrogen bond donor at pH = 7; HBA = hydrogen bond acceptor at pH = 7; logBB = calculated blood-brain partition; PSA = Polar surface area ( $\text{\AA}^2$ ); MPA = Minimal projection area ( $\text{\AA}^2$ ); LogS = Aqueous solubility (mg/ml); MPO = Central nervous system multiparameter optimization (CNS MPO).

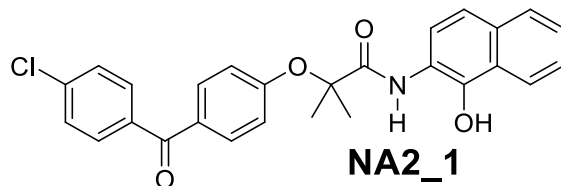

**NA2\_1**

| Calc.   | Marvin 19.20 |      | HLB  | logS  | PL    | MPA   | MSA    | RF     | HBA | LogBB |
|---------|--------------|------|------|-------|-------|-------|--------|--------|-----|-------|
|         |              | T0   | 3.07 | -8.21 | 50.79 | 48.37 | 622.91 | 129.90 | 4   | 0.004 |
| ClogP   | 6.48         | 0    |      |       |       |       |        |        |     |       |
| ClogD   | 6.48         | 0    |      |       |       |       |        |        |     |       |
| MW      | 459.92       | 0.29 |      |       |       |       |        |        |     |       |
| PSA     | 75.63        | 1    |      |       |       |       |        |        |     |       |
| HBD     | 2            | 0.5  |      |       |       |       |        |        |     |       |
| pKa     | 8.37         | 0.82 |      |       |       |       |        |        |     |       |
| CNS MPO | 2.61         |      |      |       |       |       |        |        |     |       |

ClogP = calculated partitioning; HLB = hydrophilic-lipophilic balance; logS = water solubility; PL = polarizability( $\text{\AA}^3$ ); RF = Refractivity; HBD = hydrogen bond donor at pH = 7; HBA = hydrogen bond acceptor at pH = 7; logBB = calculated blood-brain partition; PSA = Polar surface area ( $\text{\AA}^2$ ); MPA = Minimal projection area ( $\text{\AA}^2$ ); LogS = Aqueous solubility (mg/ml); MPO = Central nervous system multiparameter optimization (CNS MPO).



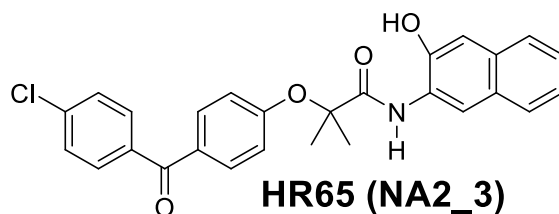

**HR65 (NA2\_3)**

| Calc. | Marvin 19.20 | HLB  | logS  | PL    | MPA   | MSA    | RF     | HBA | LogBB |
|-------|--------------|------|-------|-------|-------|--------|--------|-----|-------|
|       | T0           | 3.07 | -8.27 | 50.78 | 50.52 | 623.20 | 129.90 | 4   | 0.004 |
| ClogP | 6.48         | 0    |       |       |       |        |        |     |       |
| ClogD | 6.42         | 0    |       |       |       |        |        |     |       |
| MW    | 459.92       | 0.29 |       |       |       |        |        |     |       |
| PSA   | 75.63        | 1    |       |       |       |        |        |     |       |
| HBD   | 2            | 0.5  |       |       |       |        |        |     |       |
| pKa   | 8.53         | 0.74 |       |       |       |        |        |     |       |
| MPO   | 2.53         |      |       |       |       |        |        |     |       |

ClogP = calculated partitioning; HLB = hydrophilic-lipophilic balance; logS = water solubility; PL = polarizability( $\text{\AA}^3$ ); RF = Refractivity; HBD = hydrogen bond donor at pH = 7; HBA = hydrogen bond acceptor at pH =7; logBB = calculated blood-brain partition; PSA = Polar surface area ( $\text{\AA}^2$ ); MPA = Minimal projection area ( $\text{\AA}^2$ ); LogS = Aqueous solubility (mg/ml); MPO = Central nervous system multiparameter optimization (CNS MPO).

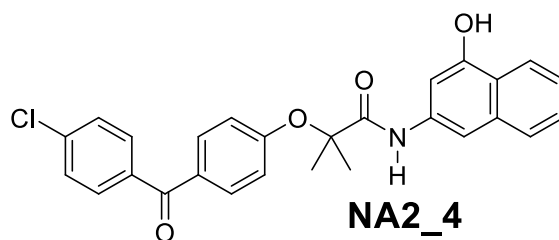

**NA2\_4**

| Calc.   | Marvin 19.20 | HLB  | logS  | PL    | MPA   | MSA    | RF     | HBA | LogBB |
|---------|--------------|------|-------|-------|-------|--------|--------|-----|-------|
|         | T0           | 3.07 | -8.05 | 50.79 | 51.20 | 624.70 | 129.90 | 4   | 0.004 |
| ClogP   | 6.48         | 0    |       |       |       |        |        |     |       |
| ClogD   | 6.48         | 0    |       |       |       |        |        |     |       |
| MW      | 459.92       | 0.29 |       |       |       |        |        |     |       |
| PSA     | 75.63        | 1    |       |       |       |        |        |     |       |
| HBD     | 2            | 0.5  |       |       |       |        |        |     |       |
| pKa     | 8.82         | 0.59 |       |       |       |        |        |     |       |
| CNS MPO | 2.38         |      |       |       |       |        |        |     |       |

ClogP = calculated partitioning; HLB = hydrophilic-lipophilic balance; logS = water solubility; PL = polarizability( $\text{\AA}^3$ ); RF = Refractivity; HBD = hydrogen bond donor at pH = 7; HBA = hydrogen bond acceptor at pH =7; logBB = calculated blood-brain partition; PSA = Polar surface area ( $\text{\AA}^2$ ); MPA = Minimal projection area ( $\text{\AA}^2$ ); LogS = Aqueous solubility (mg/ml); MPO = Central nervous system multiparameter optimization (CNS MPO).

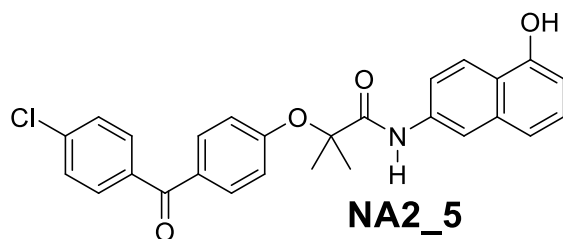

| Calc. | Marvin 19.20 |      | HLB  | logS  | PL    | MPA   | MSA    | RF     | HBA | LogBB |
|-------|--------------|------|------|-------|-------|-------|--------|--------|-----|-------|
|       |              | T0   | 3.07 | -8.28 | 50.79 | 50.10 | 624.00 | 129.90 | 4   | 0.004 |
| ClogP | 6.48         | 0    |      |       |       |       |        |        |     |       |
| ClogD | 6.48         | 0    |      |       |       |       |        |        |     |       |
| MW    | 459.92       | 0.29 |      |       |       |       |        |        |     |       |
| PSA   | 75.63        | 1    |      |       |       |       |        |        |     |       |
| HBD   | 2            | 0.5  |      |       |       |       |        |        |     |       |
| pKa   | 9.63         | 0.18 |      |       |       |       |        |        |     |       |
| CNS   | 1.97         |      |      |       |       |       |        |        |     |       |
| MPO   |              |      |      |       |       |       |        |        |     |       |

ClogP = calculated partitioning; HLB = hydrophilic-lipophilic balance; logS = water solubility; PL = polarizability( $\text{\AA}^3$ ); RF = Refractivity; HBD = hydrogen bond donor at pH = 7; HBA = hydrogen bond acceptor at pH =7; logBB = calculated blood-brain partition; PSA = Polar surface area ( $\text{\AA}^2$ ); MPA = Minimal projection area ( $\text{\AA}^2$ ); LogS = Aqueous solubility (mg/ml); MPO = Central nervous system multiparameter optimization (CNS MPO).

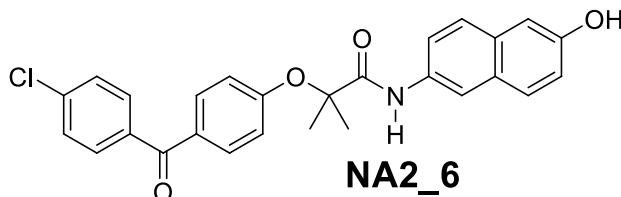

| Calc. | Marvin 19.20 |      | HLB  | logS  | PL    | MPA   | MSA    | RF     | HBA | LogBB |
|-------|--------------|------|------|-------|-------|-------|--------|--------|-----|-------|
|       |              | T0   | 3.07 | -8.10 | 50.78 | 49.47 | 625.21 | 129.90 | 4   | 0.004 |
| ClogP | 6.48         | 0    |      |       |       |       |        |        |     |       |
| ClogD | 6.48         | 0    |      |       |       |       |        |        |     |       |
| MW    | 459.92       | 0.29 |      |       |       |       |        |        |     |       |
| PSA   | 75.63        | 1    |      |       |       |       |        |        |     |       |
| HBD   | 2            | 0.5  |      |       |       |       |        |        |     |       |
| pKa   | 9.79         | 0.11 |      |       |       |       |        |        |     |       |
| CNS   | 1.90         |      |      |       |       |       |        |        |     |       |
| MPO   |              |      |      |       |       |       |        |        |     |       |

ClogP = calculated partitioning; HLB = hydrophilic-lipophilic balance; logS = water solubility; PL = polarizability( $\text{\AA}^3$ ); RF = Refractivity; HBD = hydrogen bond donor at pH = 7; HBA = hydrogen bond acceptor at pH =7; logBB = calculated blood-brain partition; PSA = Polar surface area ( $\text{\AA}^2$ ); MPA = Minimal projection area ( $\text{\AA}^2$ ); LogS = Aqueous solubility (mg/ml); MPO = Central nervous system multiparameter optimization (CNS MPO).

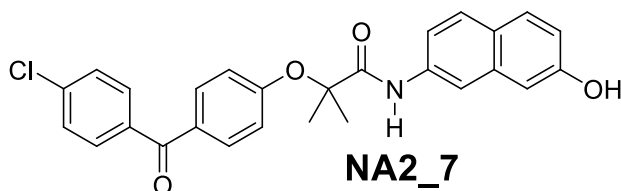

| Calc.   | Marvin 19.20 | HLB  | logS | PL    | MPA   | MSA   | RF     | HBA    | LogBB |       |
|---------|--------------|------|------|-------|-------|-------|--------|--------|-------|-------|
|         |              | T0   | 3.07 | -8.11 | 50.78 | 52.36 | 625.42 | 129.90 | 4     | 0.004 |
| ClogP   | 6.48         | 0    |      |       |       |       |        |        |       |       |
| ClogD   | 6.48         | 0    |      |       |       |       |        |        |       |       |
| MW      | 459.92       | 0.29 |      |       |       |       |        |        |       |       |
| PSA     | 75.63        | 1    |      |       |       |       |        |        |       |       |
| HBD     | 2            | 0.5  |      |       |       |       |        |        |       |       |
| pKa     | 9.77         | 0.12 |      |       |       |       |        |        |       |       |
| CNS MPO | 1.91         |      |      |       |       |       |        |        |       |       |

ClogP = calculated partitioning; HLB = hydrophilic-lipophilic balance; logS = water solubility; PL = polarizability( $\text{\AA}^3$ ); RF = Refractivity; HBD = hydrogen bond donor at pH = 7; HBA = hydrogen bond acceptor at pH =7; logBB = calculated blood-brain partition; PSA = Polar surface area ( $\text{\AA}^2$ ); MPA = Minimal projection area ( $\text{\AA}^2$ ); LogS = Aqueous solubility (mg/ml); MPO = Central nervous system multiparameter optimization (CNS MPO).

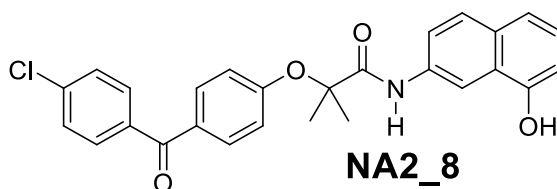

| Calc.   | Marvin 19.20 | HLB  | logS | PL    | MPA   | MSA   | RF     | HBA    | LogBB |       |
|---------|--------------|------|------|-------|-------|-------|--------|--------|-------|-------|
|         |              | T0   | 3.07 | -8.33 | 50.79 | 49.87 | 623.98 | 129.90 | 4     | 0.004 |
| ClogP   | 6.48         | 0    |      |       |       |       |        |        |       |       |
| ClogD   | 6.48         | 0    |      |       |       |       |        |        |       |       |
| MW      | 459.92       | 0.29 |      |       |       |       |        |        |       |       |
| PSA     | 75.63        | 1    |      |       |       |       |        |        |       |       |
| HBD     | 2            | 0.5  |      |       |       |       |        |        |       |       |
| pKa     | 9.54         | 0.23 |      |       |       |       |        |        |       |       |
| CNS MPO | 2.02         |      |      |       |       |       |        |        |       |       |

ClogP = calculated partitioning; HLB = hydrophilic-lipophilic balance; logS = water solubility; PL = polarizability( $\text{\AA}^3$ ); RF = Refractivity; HBD = hydrogen bond donor at pH = 7; HBA = hydrogen bond acceptor at pH =7; logBB = calculated blood-brain partition; PSA = Polar surface area ( $\text{\AA}^2$ ); MPA = Minimal projection area ( $\text{\AA}^2$ ); LogS = Aqueous solubility (mg/ml); MPO = Central nervous system multiparameter optimization (CNS MPO).

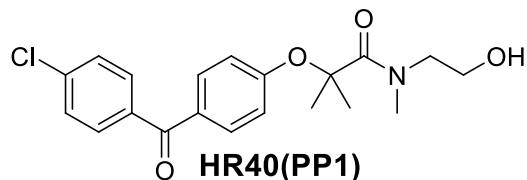

| Calc.   | Marvin 19.20 |      | HLB  | logS  | PL    | MPA   | MSA    | RF     | HBA | LogBB |
|---------|--------------|------|------|-------|-------|-------|--------|--------|-----|-------|
|         |              |      | 7.54 | -5.09 | 39.25 | 51.69 | 551.21 | 101.10 | 4   | -0.35 |
| ClogP   | 3.31         | 0.85 |      |       |       |       |        |        |     |       |
| ClogD   | 3.31         | 0.35 |      |       |       |       |        |        |     |       |
| MW      | 375.85       | 0.89 |      |       |       |       |        |        |     |       |
| PSA     | 66.84        | 1    |      |       |       |       |        |        |     |       |
| HBD     | 1            | 0.83 |      |       |       |       |        |        |     |       |
| pKa     | 15.57        | 0    |      |       |       |       |        |        |     |       |
| CNS MPO | 3.92         |      |      |       |       |       |        |        |     |       |

ClogP = calculated partitioning; HLB = hydrophilic-lipophilic balance; logS = water solubility; PL = polarizability( $\text{\AA}^3$ ); RF = Refractivity; HBD = hydrogen bond donor at pH = 7; HBA = hydrogen bond acceptor at pH =7; logBB = calculated blood-brain partition; PSA = Polar surface area ( $\text{\AA}^2$ ); MPA = Minimal projection area ( $\text{\AA}^2$ ); LogS = Aqueous solubility (mg/ml); MPO = Central nervous system multiparameter optimization (CNS MPO).

# Known drugs use for ClogBB calibration

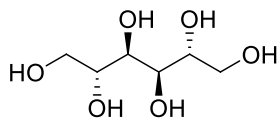

Mannitol  
LogBB = - 2.51  
ClogBB = - 2.22

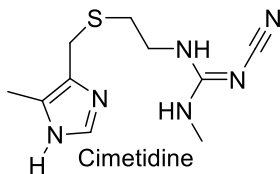

Cimetidine  
LogBB = - 1.42  
ClogBB = - 1.19

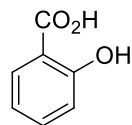

Salicylate  
LogBB = - 1.10  
ClogBB = - 0.61

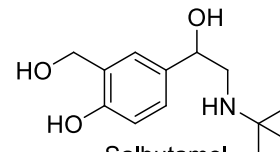

Salbutamol  
LogBB = - 1.03  
ClogBB = - 0.80

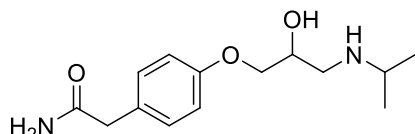

Atenolol  
LogBB = - 0.87  
ClogBB = - 1.05

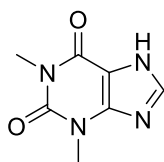

Theophylline  
LogBB = - 0.29  
ClogBB = - 1.00

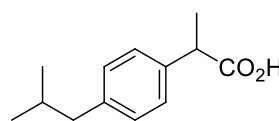

Ibuprofen  
LogBB = - 0.18  
ClogBB = 0.17

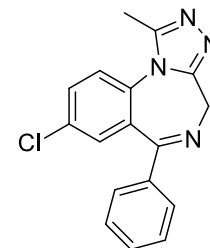

Alprazolam  
LogBB = 0.02  
ClogBB = -0.04

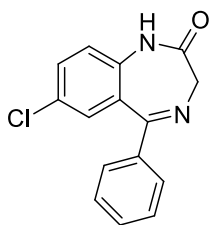

Nordazepam  
LogBB = 0.50  
ClogBB = 0.01

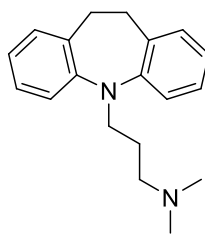

Imipramine  
LogBB = 0.83  
ClogBB = 0.69

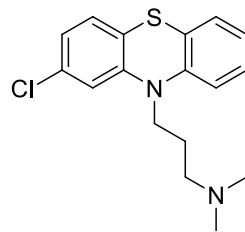

Chlorpromazine  
LogBB = 1.06  
ClogBB = 0.73

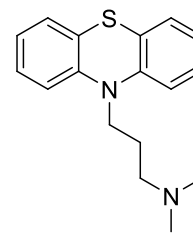

Promazine  
LogBB = 1.23  
ClogBB = 0.64

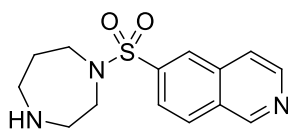

Fasudil  
ClogBB = -0.73

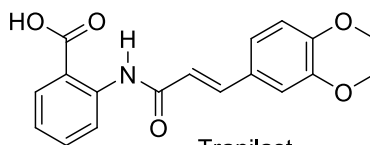

Tranilast  
ClogBB = -0.57

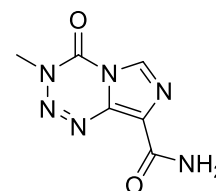

Temozolomine  
ClogBB = -1.47

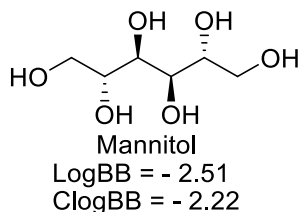

| Calc.   | Marvin 19.20 | HLB   | logS | PL    | MPA   | MSA    | RF    | HBA | LogBB |
|---------|--------------|-------|------|-------|-------|--------|-------|-----|-------|
|         |              | 15.52 | 1.16 | 15.78 | 31.17 | 264.97 | 38.40 | 6   | -2.22 |
| ClogP   | -3.73        | 1     |      |       |       |        |       |     |       |
| ClogD   | -3.73        | 1     |      |       |       |        |       |     |       |
| MW      | 182.17       | 1     |      |       |       |        |       |     |       |
| TPSA    | 121.38       | 0     |      |       |       |        |       |     |       |
| HBD     | 6            | 0     |      |       |       |        |       |     |       |
| pKa     | 12.59        | 0     |      |       |       |        |       |     |       |
| CNS MPO | 3.00         |       |      |       |       |        |       |     |       |

HLB = hydrophilic-lipophilic balance; logS = water solubility; PL = polarizability( $\text{\AA}^3$ ); Minimal Projection Area ( $\text{\AA}^2$ ); MSA = molecular surface area; RF = Refractivity; HBA = hydrogen bond acceptors; LogBB = blood-brain distribution; ClogP = partitioning; ClogD = distribution at pKa; TPSA = polar surface area; HBD = hydrogen bond donors; CNS MPO = score for CNS penetration.

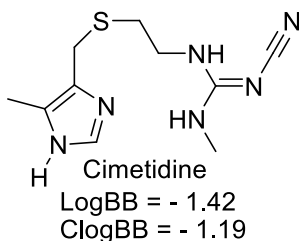

| Calc.   | Marvin 19.20 | HLB   | logS  | PL    | MPA   | MSA    | RF    | HBA | LogBB |
|---------|--------------|-------|-------|-------|-------|--------|-------|-----|-------|
|         |              | 17.86 | -1.62 | 25.89 | 40.62 | 372.97 | 70.32 | 5   | -1.19 |
| ClogP   | -0.11        | 1     |       |       |       |        |       |     |       |
| ClogD   | -0.24        | 1     |       |       |       |        |       |     |       |
| MW      | 252.34       | 1     |       |       |       |        |       |     |       |
| TPSA    | 88.89        | 0.67  |       |       |       |        |       |     |       |
| HBD     | 3            | 0.17  |       |       |       |        |       |     |       |
| pKa     | 14.16        | 0     |       |       |       |        |       |     |       |
| CNS MPO | 3.84         |       |       |       |       |        |       |     |       |

HLB = hydrophilic-lipophilic balance; logS = water solubility; PL = polarizability( $\text{\AA}^3$ ); Minimal Projection Area ( $\text{\AA}^2$ ); MSA = molecular surface area; RF = Refractivity; HBA = hydrogen bond acceptors; LogBB = blood-brain distribution; ClogP = partitioning; ClogD = distribution at pKa; TPSA = polar surface area; HBD = hydrogen bond donors; CNS MPO = score for CNS penetration.

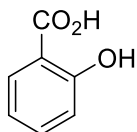

Salicylate  
LogBB = - 1.10  
ClogBB = - 0.61

| Calc.   | Marvin 19.20 |     | HLB  | logS | PL    | MPA   | MSA    | RF    | HBA | LogBB |
|---------|--------------|-----|------|------|-------|-------|--------|-------|-----|-------|
|         |              |     | 8.77 | 0.93 | 13.30 | 23.52 | 182.25 | 35.30 | 3   | -0.61 |
| ClogP   | 0.65         | 1   |      |      |       |       |        |       |     |       |
| ClogD   | -1.51        | 1   |      |      |       |       |        |       |     |       |
| MW      | 138.12       | 1   |      |      |       |       |        |       |     |       |
| TPSA    | 57.53        | 1   |      |      |       |       |        |       |     |       |
| HBD     | 2            | 0.5 |      |      |       |       |        |       |     |       |
| pKa     | 2.79         | 1   |      |      |       |       |        |       |     |       |
| CNS MPO | 5.5          |     |      |      |       |       |        |       |     |       |

HLB = hydrophilic-lipophilic balance; logS = water solubility; PL = polarizability( $\text{\AA}^3$ ); Minimal Projection Area ( $\text{\AA}^2$ ); MSA = molecular surface area; RF = Refractivity; HBA = hydrogen bond acceptors; LogBB = blood-brain distribution; ClogP = partitioning; ClogD = distribution at pKa; TPSA = polar surface area; HBD = hydrogen bond donors; CNS MPO = score for CNS penetration.

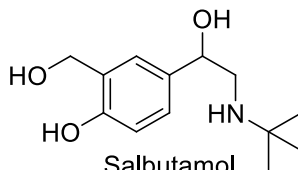

Salbutamol  
LogBB = - 1.03  
ClogBB = - 0.80

| Calc.   | Marvin 19.20 |   | HLB   | logS | PL    | MPA   | MSA    | RF    | HBA | LogBB |
|---------|--------------|---|-------|------|-------|-------|--------|-------|-----|-------|
|         |              |   | 14.06 | 0.93 | 26.58 | 44.36 | 406.23 | 67.87 | 4   | -0.80 |
| ClogP   | 0.88         | 1 |       |      |       |       |        |       |     |       |
| ClogD   | -1.08        | 1 |       |      |       |       |        |       |     |       |
| MW      | 239.32       | 1 |       |      |       |       |        |       |     |       |
| TPSA    | 72.72        | 1 |       |      |       |       |        |       |     |       |
| HBD     | 4            | 0 |       |      |       |       |        |       |     |       |
| pKa     | 10.12        | 0 |       |      |       |       |        |       |     |       |
| CNS MPO | 4.0          |   |       |      |       |       |        |       |     |       |

HLB = hydrophilic-lipophilic balance; logS = water solubility; PL = polarizability( $\text{\AA}^3$ ); Minimal Projection Area ( $\text{\AA}^2$ ); MSA = molecular surface area; RF = Refractivity; HBA = hydrogen bond acceptors; LogBB = blood-brain distribution; ClogP = partitioning; ClogD = distribution at pKa; TPSA = polar surface area; HBD = hydrogen bond donors; CNS MPO = score for CNS penetration.

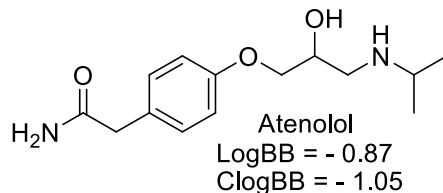

| Calc.   | Marvin 19.20 |      | HLB   | logS | PL    | MPA   | MSA    | RF    | HBA | LogBB |
|---------|--------------|------|-------|------|-------|-------|--------|-------|-----|-------|
|         |              |      | 15.10 | 0.31 | 29.09 | 42.93 | 440.22 | 73.51 | 4   | -1.05 |
| ClogP   | 0.43         | 1    |       |      |       |       |        |       |     |       |
| ClogD   | -1.81        | 1    |       |      |       |       |        |       |     |       |
| MW      | 266.34       | 1    |       |      |       |       |        |       |     |       |
| TPSA    | 84.58        | 1    |       |      |       |       |        |       |     |       |
| HBD     | 3            | 0.17 |       |      |       |       |        |       |     |       |
| pKa     | 14.08        | 0    |       |      |       |       |        |       |     |       |
| CNS MPO | 4.17         |      |       |      |       |       |        |       |     |       |

HLB = hydrophilic-lipophilic balance; logS = water solubility; PL = polarizability( $\text{\AA}^3$ ); Minimal Projection Area ( $\text{\AA}^2$ ); MSA = molecular surface area; RF = Refractivity; HBA = hydrogen bond acceptors; LogBB = blood-brain distribution; ClogP = partitioning; ClogD = distribution at pKa; TPSA = polar surface area; HBD = hydrogen bond donors; CNS MPO = score for CNS penetration.

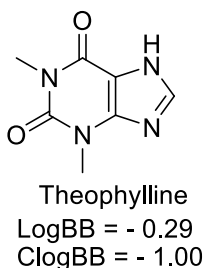

| Calc.   | Marvin 19.20 |      | HLB   | logS  | PL    | MPA   | MSA    | RF    | HBA | LogBB |
|---------|--------------|------|-------|-------|-------|-------|--------|-------|-----|-------|
|         |              |      | 13.46 | -0.80 | 16.13 | 28.19 | 235.19 | 44.93 | 3   | -1.00 |
| ClogP   | -0.77        | 1    |       |       |       |       |        |       |     |       |
| ClogD   | -0.90        | 1    |       |       |       |       |        |       |     |       |
| MW      | 180.17       | 1    |       |       |       |       |        |       |     |       |
| TPSA    | 69.30        | 1    |       |       |       |       |        |       |     |       |
| HBD     | 1            | 0.83 |       |       |       |       |        |       |     |       |
| pKa     | 7.82         | 1    |       |       |       |       |        |       |     |       |
| CNS MPO | 5.82         |      |       |       |       |       |        |       |     |       |

HLB = hydrophilic-lipophilic balance; logS = water solubility; PL = polarizability( $\text{\AA}^3$ ); Minimal Projection Area ( $\text{\AA}^2$ ); MSA = molecular surface area; RF = Refractivity; HBA = hydrogen bond acceptors; LogBB = blood-brain distribution; ClogP = partitioning; ClogD = distribution at pKa; TPSA = polar surface area; HBD = hydrogen bond donors; CNS MPO = score for CNS penetration.



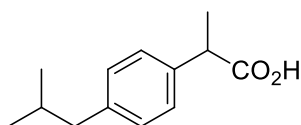

Ibuprofen  
LogBB = - 0.18  
ClogBB = 0.17

| Calc.   | Marvin 19.20 |      | HLB  | logS  | PL    | MPA   | MSA    | RF    | HBA | LogBB |
|---------|--------------|------|------|-------|-------|-------|--------|-------|-----|-------|
|         |              |      | 3.79 | -1.91 | 23.65 | 37.63 | 356.40 | 60.73 | 2   | 0.17  |
| ClogP   | 3.84         | 0.58 |      |       |       |       |        |       |     |       |
| ClogD   | 1.25         | 1    |      |       |       |       |        |       |     |       |
| MW      | 206.28       | 1    |      |       |       |       |        |       |     |       |
| TPSA    | 37.30        | 0.86 |      |       |       |       |        |       |     |       |
| HBD     | 1            | 0.83 |      |       |       |       |        |       |     |       |
| pKa     | 4.85         | 1    |      |       |       |       |        |       |     |       |
| CNS MPO | 5.27         |      |      |       |       |       |        |       |     |       |

HLB = hydrophilic-lipophilic balance; logS = water solubility; PL = polarizability( $\text{\AA}^3$ ); Minimal Projection Area ( $\text{\AA}^2$ ); MSA = molecular surface area; RF = Refractivity; HBA = hydrogen bond acceptors; LogBB = blood-brain distribution; ClogP = partitioning; ClogD = distribution at pKa; TPSA = polar surface area; HBD = hydrogen bond donors; CNS MPO = score for CNS penetration.

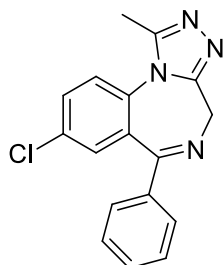

Alprazolam  
LogBB = 0.02  
ClogBB = -0.04

| Calc.   | Marvin 19.20 |      | HLB  | logS  | PL    | MPA   | MSA    | RF    | HBA | LogBB |
|---------|--------------|------|------|-------|-------|-------|--------|-------|-----|-------|
|         |              |      | 4.44 | -4.11 | 33.40 | 50.10 | 395.11 | 98.88 | 3   | -0.04 |
| ClogP   | 3.02         | 0.99 |      |       |       |       |        |       |     |       |
| ClogD   | 2.99         | 0.5  |      |       |       |       |        |       |     |       |
| MW      | 308.77       | 1    |      |       |       |       |        |       |     |       |
| TPSA    | 43.07        | 1    |      |       |       |       |        |       |     |       |
| HBD     | 0            | 1    |      |       |       |       |        |       |     |       |
| pKa     | ~35          | 0    |      |       |       |       |        |       |     |       |
| CNS MPO | 4.49         |      |      |       |       |       |        |       |     |       |

HLB = hydrophilic-lipophilic balance; logS = water solubility; PL = polarizability( $\text{\AA}^3$ ); Minimal Projection Area ( $\text{\AA}^2$ ); MSA = molecular surface area; RF = Refractivity; HBA = hydrogen bond acceptors; LogBB = blood-brain distribution; ClogP = partitioning; ClogD = distribution at pKa; TPSA = polar surface area; HBD = hydrogen bond donors; CNS MPO = score for CNS penetration.

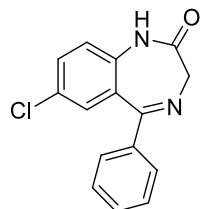

Nordazepam

LogBB = 0.50

ClogBB = 0.01

| Calc.   | Marvin 19.20 |      | HLB  | logS  | PL    | MPA   | MSA    | RF    | HBA | LogBB |
|---------|--------------|------|------|-------|-------|-------|--------|-------|-----|-------|
|         |              |      | 4.52 | -4.35 | 28.48 | 45.72 | 339.68 | 76.70 | 2   | 0.01  |
| ClogP   | 3.21         | 0.9  |      |       |       |       |        |       |     |       |
| ClogD   | 3.21         | 0.4  |      |       |       |       |        |       |     |       |
| MW      | 270.72       | 1    |      |       |       |       |        |       |     |       |
| TPSA    | 41.46        | 1    |      |       |       |       |        |       |     |       |
| HBD     | 1            | 0.83 |      |       |       |       |        |       |     |       |
| pKa     | 12.30        | 0    |      |       |       |       |        |       |     |       |
| CNS MPO | 4.13         |      |      |       |       |       |        |       |     |       |

HLB = hydrophilic-lipophilic balance; logS = water solubility; PL = polarizability( $\text{\AA}^3$ ); Minimal Projection Area ( $\text{\AA}^2$ ); MSA = molecular surface area; RF = Refractivity; HBA = hydrogen bond acceptors; LogBB = blood-brain distribution; ClogP = partitioning; ClogD = distribution at pKa; TPSA = polar surface area; HBD = hydrogen bond donors; CNS MPO = score for CNS penetration.

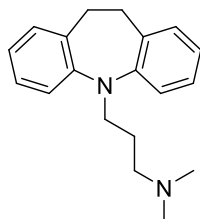

Imipramine

LogBB = 0.83

ClogBB = 0.69

| Calc.   | Marvin 19.20 |      | HLB  | logS  | PL    | MPA   | MSA    | RF    | HBA | LogBB |
|---------|--------------|------|------|-------|-------|-------|--------|-------|-----|-------|
|         |              |      | 9.28 | -2.02 | 34.67 | 53.16 | 477.91 | 90.61 | 2   | 0.69  |
| ClogP   | 4.28         | 0.36 |      |       |       |       |        |       |     |       |
| ClogD   | 2.61         | 0.70 |      |       |       |       |        |       |     |       |
| MW      | 280.42       | 1    |      |       |       |       |        |       |     |       |
| TPSA    | 6.48         | 0    |      |       |       |       |        |       |     |       |
| HBD     | 0            | 1    |      |       |       |       |        |       |     |       |
| pKa     | 35           | 0    |      |       |       |       |        |       |     |       |
| CNS MPO | 3.06         |      |      |       |       |       |        |       |     |       |

HLB = hydrophilic-lipophilic balance; logS = water solubility; PL = polarizability( $\text{\AA}^3$ ); Minimal Projection Area ( $\text{\AA}^2$ ); MSA = molecular surface area; RF = Refractivity; HBA = hydrogen bond acceptors; LogBB = blood-brain distribution; ClogP = partitioning; ClogD = distribution at pKa; TPSA = polar surface area; HBD = hydrogen bond donors; CNS MPO = score for CNS penetration.

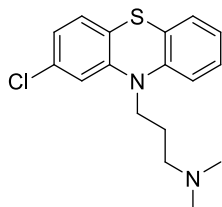

Chlorpromazine  
LogBB = 1.06  
ClogBB = 0.73

| Calc.   | Marvin 19.20 |      | HLB   | logS  | PL    | MPA   | MSA    | RF    | HBA | LogBB |
|---------|--------------|------|-------|-------|-------|-------|--------|-------|-----|-------|
|         |              |      | 11.43 | -2.91 | 35.97 | 54.40 | 456.66 | 93.76 | 2   | 0.73  |
| ClogP   | 4.54         | 0.23 |       |       |       |       |        |       |     |       |
| ClogD   | 2.81         | 0.6  |       |       |       |       |        |       |     |       |
| MW      | 318.86       | 1    |       |       |       |       |        |       |     |       |
| TPSA    | 6.48         | 0    |       |       |       |       |        |       |     |       |
| HBD     | 0            | 1    |       |       |       |       |        |       |     |       |
| pKa     | ~35          | 0    |       |       |       |       |        |       |     |       |
| CNS MPO | 2.83         |      |       |       |       |       |        |       |     |       |

HLB = hydrophilic-lipophilic balance; logS = water solubility; PL = polarizability( $\text{\AA}^3$ ); Minimal Projection Area ( $\text{\AA}^2$ ); MSA = molecular surface area; RF = Refractivity; HBA = hydrogen bond acceptors; LogBB = blood-brain distribution; ClogP = partitioning; ClogD = distribution at pKa; TPSA = polar surface area; HBD = hydrogen bond donors; CNS MPO = score for CNS penetration.

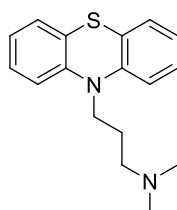

Promazine  
LogBB = 1.23  
ClogBB = 0.64

| Calc.   | Marvin 19.20 |      | HLB   | logS  | PL    | MPA   | MSA    | RF    | HBA | LogBB |
|---------|--------------|------|-------|-------|-------|-------|--------|-------|-----|-------|
|         |              |      | 11.28 | -2.41 | 34.15 | 52.56 | 440.43 | 88.95 | 2   | 0.64  |
| ClogP   | 3.93         | 0.53 |       |       |       |       |        |       |     |       |
| ClogD   | 2.19         | 0.91 |       |       |       |       |        |       |     |       |
| MW      | 284.42       | 1    |       |       |       |       |        |       |     |       |
| TPSA    | 6.48         | 0    |       |       |       |       |        |       |     |       |
| HBD     | 0            | 1    |       |       |       |       |        |       |     |       |
| pKa     | ~35          | 0    |       |       |       |       |        |       |     |       |
| CNS MPO | 3.44         |      |       |       |       |       |        |       |     |       |

HLB = hydrophilic-lipophilic balance; logS = water solubility; PL = polarizability( $\text{\AA}^3$ ); Minimal Projection Area ( $\text{\AA}^2$ ); MSA = molecular surface area; RF = Refractivity; HBA = hydrogen bond acceptors; LogBB = blood-brain distribution; ClogP = partitioning; ClogD = distribution at pKa; TPSA = polar surface area; HBD = hydrogen bond donors; CNS MPO = score for CNS penetration.

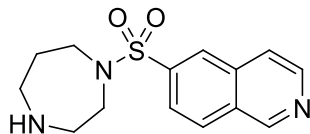

Fasudil

| Calc.   | Marvin 19.20 |      | HLB   | logS  | PL    | MPA   | MSA    | RF    | HBA | LogBB |
|---------|--------------|------|-------|-------|-------|-------|--------|-------|-----|-------|
|         |              |      | 14.63 | -1.63 | 32.22 | 49.55 | 422.39 | 77.92 | 4   | -0.73 |
| ClogP   | 0.32         | 1    |       |       |       |       |        |       |     |       |
| ClogD   | -0.41        | 1    |       |       |       |       |        |       |     |       |
| MW      | 291.37       | 1    |       |       |       |       |        |       |     |       |
| TPSA    | 62.30        | 1    |       |       |       |       |        |       |     |       |
| HBD     | 1            | 0.83 |       |       |       |       |        |       |     |       |
| pKa     | 35           | 0    |       |       |       |       |        |       |     |       |
| CNS MPO | 4.83         |      |       |       |       |       |        |       |     |       |

HLB = hydrophilic-lipophilic balance; logS = water solubility; PL = polarizability( $\text{\AA}^3$ ); Minimal Projection Area ( $\text{\AA}^2$ ); MSA = molecular surface area; RF = Refractivity; HBA = hydrogen bond acceptors; LogBB = blood-brain distribution; ClogP = partitioning; ClogD = distribution at pKa; TPSA = polar surface area; HBD = hydrogen bond donors; CNS MPO = score for CNS penetration.

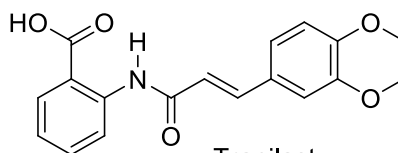

Tranilast

| Calc.   | Marvin 19.20 |      | HLB  | logS  | PL    | MPA   | MSA    | RF    | HBA | LogBB |
|---------|--------------|------|------|-------|-------|-------|--------|-------|-----|-------|
|         |              |      | 8.43 | -0.90 | 33.85 | 49.46 | 453.02 | 91.52 | 5   | -0.57 |
| ClogP   | 3.56         | 0.72 |      |       |       |       |        |       |     |       |
| ClogD   | 0.21         | 1    |      |       |       |       |        |       |     |       |
| MW      | 327.34       | 1    |      |       |       |       |        |       |     |       |
| TPSA    | 84.86        | 1    |      |       |       |       |        |       |     |       |
| HBD     | 2            | 0.5  |      |       |       |       |        |       |     |       |
| pKa     | 3.53         | 1    |      |       |       |       |        |       |     |       |
| CNS MPO | 5.22         |      |      |       |       |       |        |       |     |       |

HLB = hydrophilic-lipophilic balance; logS = water solubility; PL = polarizability( $\text{\AA}^3$ ); Minimal Projection Area ( $\text{\AA}^2$ ); MSA = molecular surface area; RF = Refractivity; HBA = hydrogen bond acceptors; LogBB = blood-brain distribution; ClogP = partitioning; ClogD = distribution at pKa; TPSA = polar surface area; HBD = hydrogen bond donors; CNS MPO = score for CNS penetration.

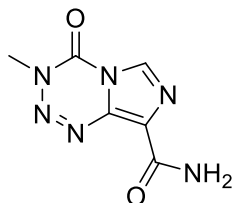

Temozolomine

| Calc.   | Marvin 19.20 |      | HLB   | logS  | PL   | MPA   | MSA    | RF    | HBA | LogBB |
|---------|--------------|------|-------|-------|------|-------|--------|-------|-----|-------|
|         |              |      | 14.72 | -0.89 | 16.8 | 26.87 | 232.02 | 47.86 | 5   | -1.47 |
| ClogP   | -0.28        | 1    |       |       |      |       |        |       |     |       |
| ClogD   | -0.28        | 1    |       |       |      |       |        |       |     |       |
| MW      | 194.15       | 1    |       |       |      |       |        |       |     |       |
| TPSA    | 105.94       | 0.47 |       |       |      |       |        |       |     |       |
| HBD     | 2            | 0.5  |       |       |      |       |        |       |     |       |
| pKa     | 10.46        | 0    |       |       |      |       |        |       |     |       |
| CNS MPO | 3.97         |      |       |       |      |       |        |       |     |       |

HLB = hydrophilic-lipophilic balance; logS = water solubility; PL = polarizability( $\text{\AA}^3$ ); Minimal Projection Area ( $\text{\AA}^2$ ); MSA = molecular surface area; RF = Refractivity; HBA = hydrogen bond acceptors; LogBB = blood-brain distribution; ClogP = partitioning; ClogD = distribution at pKa; TPSA = polar surface area; HBD = hydrogen bond donors; CNS MPO = score for CNS penetration.

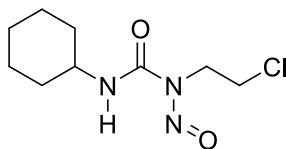

Lomustine

| Calc.   | Marvin 19.20 |      | HLB  | logS  | PL    | MPA   | MSA    | RF    | HBA | LogBB |
|---------|--------------|------|------|-------|-------|-------|--------|-------|-----|-------|
|         |              |      | 8.42 | -3.28 | 21.92 | 33.91 | 351.15 | 58.65 | 2   | -0.45 |
| ClogP   | 2.16         | 1    |      |       |       |       |        |       |     |       |
| ClogD   | 2.16         | 0.92 |      |       |       |       |        |       |     |       |
| MW      | 233.70       | 1    |      |       |       |       |        |       |     |       |
| TPSA    | 61.77        | 1    |      |       |       |       |        |       |     |       |
| HBD     | 1            | 0.83 |      |       |       |       |        |       |     |       |
| pKa     | 14.05        | 0    |      |       |       |       |        |       |     |       |
| CNS MPO | 4.75         |      |      |       |       |       |        |       |     |       |

HLB = hydrophilic-lipophilic balance; logS = water solubility; PL = polarizability( $\text{\AA}^3$ ); Minimal Projection Area ( $\text{\AA}^2$ ); MSA = molecular surface area; RF = Refractivity; HBA = hydrogen bond acceptors; LogBB = blood-brain distribution; ClogP = partitioning; ClogD = distribution at pKa; TPSA = polar surface area; HBD = hydrogen bond donors; CNS MPO = score for CNS penetration.

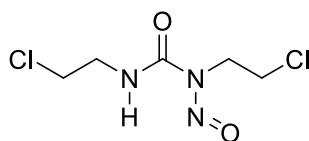

Carmustine

| Calc.   | Marvin 19.20 |  | HLB   | logS  | PL    | MPA   | MSA    | RF    | HBA | LogBB |
|---------|--------------|--|-------|-------|-------|-------|--------|-------|-----|-------|
|         |              |  | 10.81 | -2.38 | 17.32 | 29.68 | 275.91 | 46.98 | 2   | -0.62 |
| ClogP   | 1.02         |  |       |       |       |       |        |       |     |       |
| ClogD   | 1.02         |  |       |       |       |       |        |       |     |       |
| MW      | 214.05       |  |       |       |       |       |        |       |     |       |
| TPSA    | 61.77        |  |       |       |       |       |        |       |     |       |
| HBD     | 1            |  |       |       |       |       |        |       |     |       |
| pKa     | 13.36        |  |       |       |       |       |        |       |     |       |
| CNS MPO | 4.83         |  |       |       |       |       |        |       |     |       |

HLB = hydrophilic-lipophilic balance; logS = water solubility; PL = polarizability( $\text{\AA}^3$ ); Minimal Projection Area ( $\text{\AA}^2$ ); MSA = molecular surface area; RF = Refractivity; HBA = hydrogen bond acceptors; LogBB = blood-brain distribution; ClogP = partitioning; ClogD = distribution at pKa; TPSA = polar surface area; HBD = hydrogen bond donors; CNS MPO = score for CNS penetration.

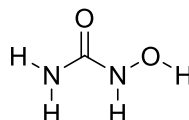

Hydroxycarbamide (hydroxyurea)

| Calc.   | Marvin 19.20 |      | HLB   | logS | PL   | MPA   | MSA    | RF    | HBA | LogBB |
|---------|--------------|------|-------|------|------|-------|--------|-------|-----|-------|
|         |              |      | 14.60 | 0.74 | 5.76 | 16.00 | 102.14 | 14.91 | 2   | -1.18 |
| ClogP   | -1.37        | 1    |       |      |      |       |        |       |     |       |
| ClogD   | -1.37        | 1    |       |      |      |       |        |       |     |       |
| MW      | 76.06        | 1    |       |      |      |       |        |       |     |       |
| TPSA    | 75.35        | 1    |       |      |      |       |        |       |     |       |
| HBD     | 3            | 0.17 |       |      |      |       |        |       |     |       |
| pKa     | 10.14        | 0    |       |      |      |       |        |       |     |       |
| CNS MPO | 4.17         |      |       |      |      |       |        |       |     |       |

HLB = hydrophilic-lipophilic balance; logS = water solubility; PL = polarizability( $\text{\AA}^3$ ); Minimal Projection Area ( $\text{\AA}^2$ ); MSA = molecular surface area; RF = Refractivity; HBA = hydrogen bond acceptors; LogBB = blood-brain distribution; ClogP = partitioning; ClogD = distribution at pKa; TPSA = polar surface area; HBD = hydrogen bond donors; CNS MPO = score for CNS penetration.

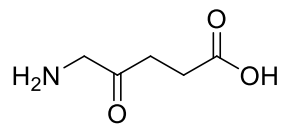

Gliolan (Aminolevulinic acid)

| Calc.   | Marvin 19.20 |     | HLB   | logS | PL    | MPA   | MSA    | RF    | HBA | LogBB |
|---------|--------------|-----|-------|------|-------|-------|--------|-------|-----|-------|
|         |              |     | 16.82 | 0.75 | 12.15 | 24.44 | 203.06 | 30.45 | 4   | -1.20 |
| ClogP   | -0.99        | 1   |       |      |       |       |        |       |     |       |
| ClogD   | -3.41        | 1   |       |      |       |       |        |       |     |       |
| MW      | 131.13       | 1   |       |      |       |       |        |       |     |       |
| TPSA    | 80.39        | 1   |       |      |       |       |        |       |     |       |
| HBD     | 2            | 0.5 |       |      |       |       |        |       |     |       |
| pKa     | 4.05         | 1   |       |      |       |       |        |       |     |       |
| CNS MPO | 5.5          |     |       |      |       |       |        |       |     |       |

HLB = hydrophilic-lipophilic balance; logS = water solubility; PL = polarizability( $\text{\AA}^3$ ); Minimal Projection Area ( $\text{\AA}^2$ ); MSA = molecular surface area; RF = Refractivity; HBA = hydrogen bond acceptors; LogBB = blood-brain distribution; ClogP = partitioning; ClogD = distribution at pKa; TPSA = polar surface area; HBD = hydrogen bond donors; CNS MPO = score for CNS penetration.

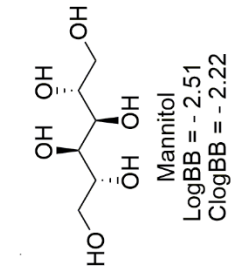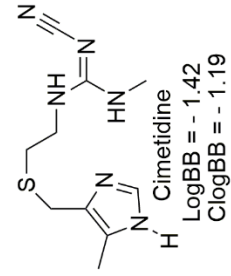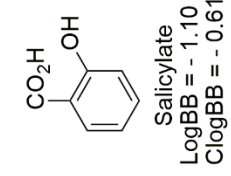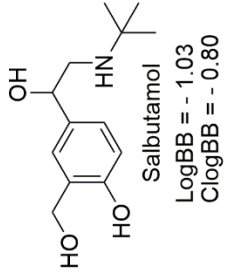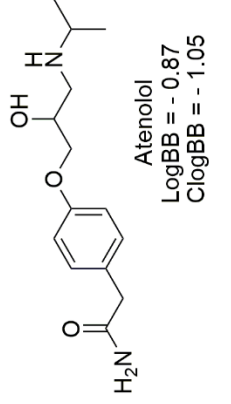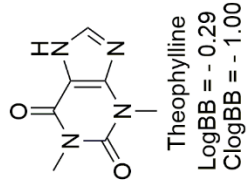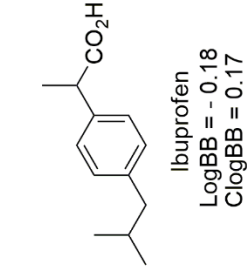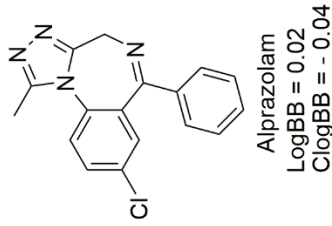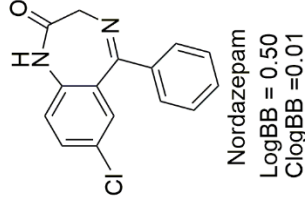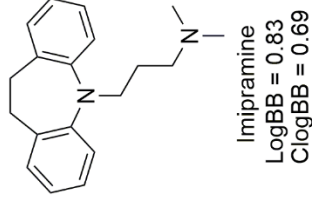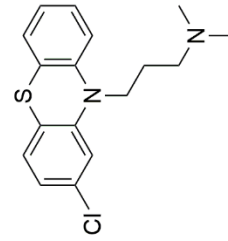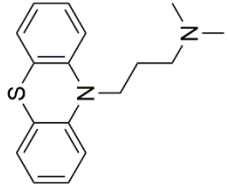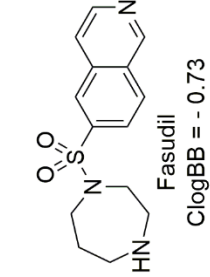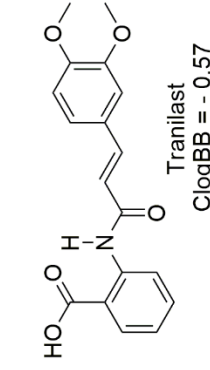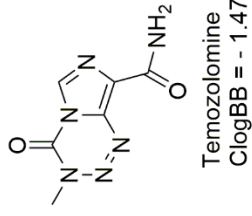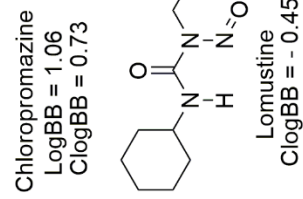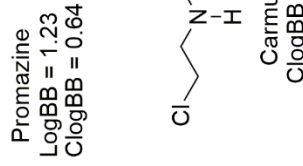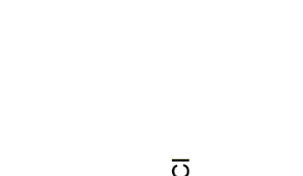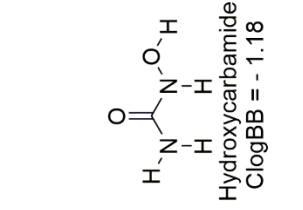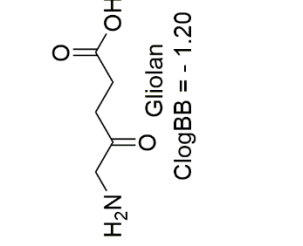



|    | Comp.            | logP  | PSA    | A+D | <sup>a</sup> LogBB | <sup>b</sup> ClogBB | <sup>c</sup> RlogBB | <sup>a</sup> ALofBB | <sup>d</sup> BlogBB | <sup>f</sup> DlogBB | CNS  |
|----|------------------|-------|--------|-----|--------------------|---------------------|---------------------|---------------------|---------------------|---------------------|------|
| 1  | Mannitol         | -3.73 | 121.38 | 12  | -2.51              | -2.23               | -1.63               | -1.40               | -1.46               | -9.27               | 3.00 |
| 2  | Cimetidine       | -0.11 | 88.89  | 8   | -1.42              | -1.19               | -0.74               | -0.60               | -0.63               | -5.12               | 3.84 |
| 3  | Salicylate       | 0.65  | 57.53  | 5   | -1.10              | -0.61               | -0.31               | -0.24               | -0.26               | -2.22               | 5.50 |
| 4  | Salbutamol       | 0.88  | 72.72  | 8   | -1.03              | -0.80               | -0.43               | -0.32               | -0.34               | -4.36               | 4.00 |
| 5  | Atenolol         | 0.43  | 84.58  | 7   | -0.87              | -1.05               | -0.62               | -0.49               | -0.51               | -4.29               | 4.17 |
| 6  | Theophylline     | -0.77 | 69.30  | 4   | -0.29              | -1.00               | -0.65               | -0.54               | -0.58               | -2.36               | 5.82 |
| 7  | Ibuprofen        | 3.84  | 37.30  | 3   | -0.18              | 0.17                | 0.39                | 0.40                | 0.40                | 0.30                | 5.27 |
| 8  | Alprazolam       | 3.02  | 43.07  | 3   | 0.02               | -0.04               | 0.20                | 0.23                | 0.23                | -0.07               | 4.44 |
| 9  | Nordazepam       | 3.21  | 41.46  | 3   | 0.50               | 0.01                | 0.25                | 0.27                | 0.27                | 0.02                | 4.13 |
| 10 | Imipramine       | 4.28  | 6.48   | 2   | 0.83               | 0.69                | 0.76                | 0.71                | 0.72                | 1.98                | 3.09 |
| 11 | Chlorpromazine   | 4.54  | 6.48   | 2   | 1.06               | 0.74                | 0.80                | 0.75                | 0.76                | 2.04                | 2.83 |
| 12 | Promazine        | 3.93  | 6.48   | 2   | 1.23               | 0.64                | 0.71                | 0.66                | 0.67                | 1.90                | 3.44 |
| 13 | Fasudil          | 0.32  | 62.30  | 5   |                    | -0.74               | -0.41               | -0.32               | -0.35               | -2.45               | 4.83 |
| 14 | Tranilast        | 3.56  | 84.86  | 7   |                    | -0.58               | -0.13               | -0.02               | -0.02               | -3.58               | 5.22 |
| 15 | Temozolomine     | -0.28 | 105.94 | 7   |                    | -1.47               | -0.94               | -0.76               | -0.79               | -5.15               | 3.97 |
| 16 | Lomustine        | 2.16  | 61.77  | 3   |                    | -0.45               | -0.12               | -0.05               | -0.05               | -0.88               | 4.72 |
| 17 | Carmustine       | 1.02  | 61.77  | 3   |                    | -0.62               | -0.30               | -0.22               | -0.23               | -1.14               | 4.83 |
| 18 | Hydroxycarbamide | -1.37 | 75.35  | 5   |                    | -1.18               | -0.80               | -0.68               | -0.72               | -3.26               | 4.17 |
| 19 | Gliolan          | -0.99 | 80.39  | 6   |                    | -1.20               | -0.79               | -0.66               | -0.70               | -3.91               | 5.5  |

<sup>a</sup>Experimental LogBB: experimental values are taken from compile logBB in Carpenter, T. S.; Krishner, D. A.; Lau, E. Y.; Wong, S. E.; Nilmeier, J. P.; Lightstone "A Method to Predict Blood-Brain Barrier Permeability of Drug-Like Compounds Using Molecular Dynamics Simulations" *Biophysical Journal* **2014**, *107*, 630-641.

<sup>b</sup>Clark: ClogBB = 0.152 x logP - 0.0148 x PSA + 0.139.

<sup>c</sup>Rishton: RlogBB = 0.155 x logP - 0.01 x PSA + 0.164.

<sup>d</sup>From first larger fitting set (371 compounds): AlogBB = 0.149 x logP - 0.008 x PSA + 0.127.

<sup>e</sup>From second smaller fitting set (from 274 compounds): BlogBB = 0.157 x logP - 0.008 x PSA + 0.1.

<sup>f</sup>DlogBB = 0.2289 x log P - 0.0326 x PSA - 0.5671 x (D + A) + 2.342.

Equations were generated from data obtained from studies performed in Chevalier, R. "Penetration Assessment of Dietary Supplements and Drugs through the Blood-Brain Barrier for Potential Treatment of Parkinson's Disease" bioRxiv, doi: <https://doi.org/10.1101/362541>, 2018.

## Nine Compounds with excellent anti-glioblastoma activity (LN229) at 25 $\mu\text{M}$

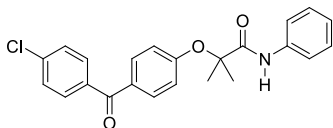

**HR48 (PP98)** CV =  $(3.19 \pm 3.64) \%$ ;  
MPA =  $43.73 \text{ \AA}^2$ ; PL =  $42.67 \text{ \AA}^3$ ;  
RF =  $111.47 \text{ m}^3 \text{ mol}^{-1}$ ; logS =  $-7.07 \text{ mol/l}$

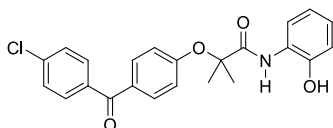

**HR49 (PP99)** CV =  $(0 \pm 0.27) \%$ ;  
MPA =  $43.75 \text{ \AA}^2$ ; PL =  $43.28 \text{ \AA}^3$ ;  
RF =  $113.45 \text{ m}^3 \text{ mol}^{-1}$ ; logS =  $-6.61 \text{ mol/l}$

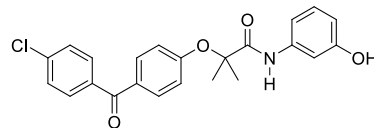

**HR50 (PP100)** CV =  $(0 \pm 0.48) \%$ ;  
MPA =  $45.22 \text{ \AA}^2$ ; PL =  $43.28 \text{ \AA}^3$ ;  
RF =  $113.45 \text{ m}^3 \text{ mol}^{-1}$ ; LogS =  $-6.61 \text{ mol/l}$

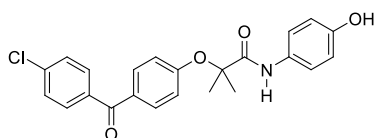

**HR51 (PP12)** CV =  $(1.1 \pm 1.42) \%$ ;  
MPA =  $49.70 \text{ \AA}^2$ ; PL =  $43.28 \text{ \AA}^3$ ;  
RF =  $113.45 \text{ m}^3 \text{ mol}^{-1}$ ; logS =  $-6.61 \text{ mol/l}$

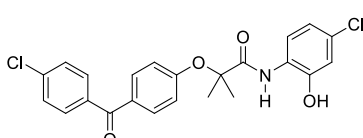

**HR54 (PP184)** CV =  $(1.89 \pm 1.56) \%$ ;  
MPA =  $46.41 \text{ \AA}^2$ ; PL =  $45.17 \text{ \AA}^3$ ;  
RF =  $118.26 \text{ m}^3 \text{ mol}^{-1}$ ; logS =  $-7.08 \text{ mol/l}$

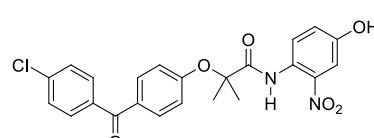

**HR57 (PP182)** CV =  $(1.29 \pm 2.79) \%$ ;  
MPA =  $47.50 \text{ \AA}^2$ ; PL =  $45.20 \text{ \AA}^3$ ;  
RF =  $119.77 \text{ m}^3 \text{ mol}^{-1}$ ; logS =  $-7.05 \text{ mol/l}$

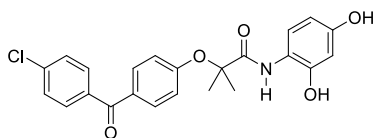

**HR59 (PP171)** CV =  $(0.88 \pm 1.50) \%$ ;  
MPA =  $44.25 \text{ \AA}^2$ ; PL =  $43.90 \text{ \AA}^3$ ;  
RF =  $115.43 \text{ m}^3 \text{ mol}^{-1}$ ; logS =  $-6.11 \text{ mol/l}$

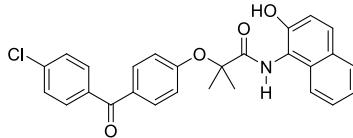

**HR61 (PP201)** CV =  $(2.87 \pm 1.05) \%$ ;  
MPA =  $48.22 \text{ \AA}^2$ ; PL =  $50.79 \text{ \AA}^3$ ;  
RF =  $129.90 \text{ m}^3 \text{ mol}^{-1}$ ; logS =  $-8.28 \text{ mol/l}$

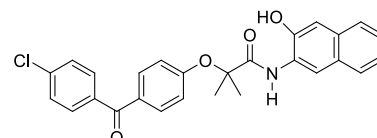

**HR65 (PP197)** CV =  $(1.49 \pm 0.32) \%$ ;  
MPA =  $50.52 \text{ \AA}^2$ ; PL =  $50.78 \text{ \AA}^3$ ;  
RF =  $129.90 \text{ m}^3 \text{ mol}^{-1}$ ; LogS =  $-8.29 \text{ mol/l}$

DMSO

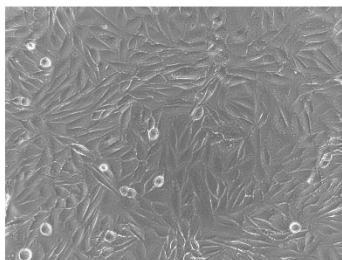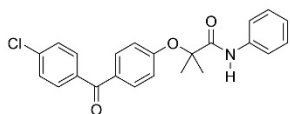

**HR48 (PP98)** CV = (3.19 ± 3.64) %;  
MPA = 43.73 Å<sup>2</sup>; PL = 42.67 Å<sup>3</sup>;  
RF = 111.47 m<sup>3</sup> mol<sup>-1</sup>; logS = -7.07 mol/l

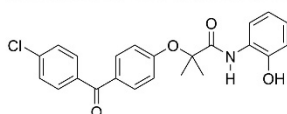

**HR49 (PP99)** CV = (0 ± 0.27) %;  
MPA = 43.75 Å<sup>2</sup>; PL = 43.28 Å<sup>3</sup>;  
RF = 113.45 m<sup>3</sup> mol<sup>-1</sup>; logS = -6.61 mol/l

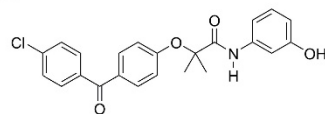

**HR50 (PP100)** CV = (0 ± 0.48) %;  
MPA = 45.22 Å<sup>2</sup>; PL = 43.28 Å<sup>3</sup>;  
RF = 113.45 m<sup>3</sup> mol<sup>-1</sup>; LogS = -6.61 mol/l

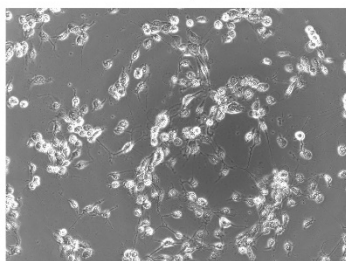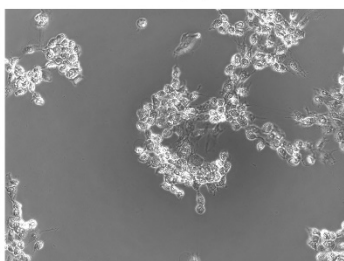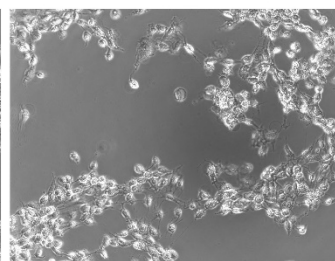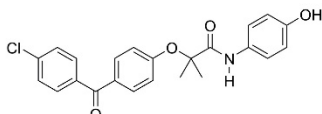

**HR51 (PP12)** CV = (1.1 ± 1.42) %;  
MPA = 49.70 Å<sup>2</sup>; PL = 43.28 Å<sup>3</sup>;  
RF = 113.45 m<sup>3</sup> mol<sup>-1</sup>; logS = -6.61 mol/l

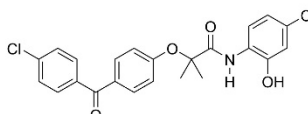

**HR54 (PP184)** CV = (1.89 ± 1.56) %;  
MPA = 46.41 Å<sup>2</sup>; PL = 45.17 Å<sup>3</sup>;  
RF = 118.26 m<sup>3</sup> mol<sup>-1</sup>; logS = -7.08 mol/l

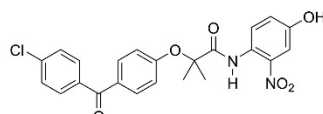

**HR57 (PP182)** CV = (1.29 ± 2.79) %;  
MPA = 47.50 Å<sup>2</sup>; PL = 45.20 Å<sup>3</sup>;  
RF = 119.77 m<sup>3</sup> mol<sup>-1</sup>; logS = -7.05 mol/l

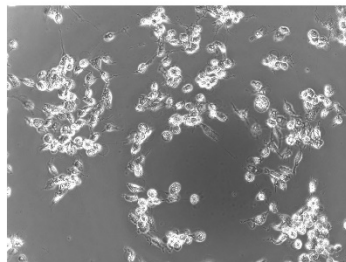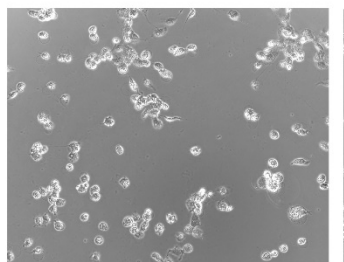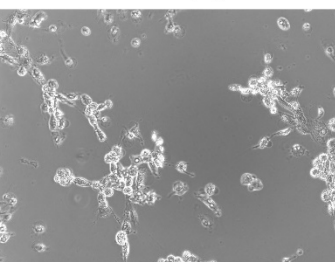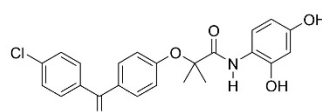

**HR59 (PP171)** CV = (0.88 ± 1.50) %;  
MPA = 44.25 Å<sup>2</sup>; PL = 43.90 Å<sup>3</sup>;  
RF = 115.43 m<sup>3</sup> mol<sup>-1</sup>; logS = -6.11 mol/l

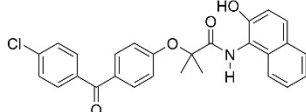

**HR61 (PP201)** CV = (2.87 ± 1.05) %;  
MPA = 48.22 Å<sup>2</sup>; PL = 50.79 Å<sup>3</sup>;  
RF = 129.90 m<sup>3</sup> mol<sup>-1</sup>; logS = -8.28 mol/l

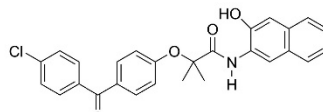

**HR65 (PP197)** CV = (1.49 ± 0.32) %;  
MPA = 50.52 Å<sup>2</sup>; PL = 50.78 Å<sup>3</sup>;  
RF = 129.90 m<sup>3</sup> mol<sup>-1</sup>; LogS = -8.29 mol/l

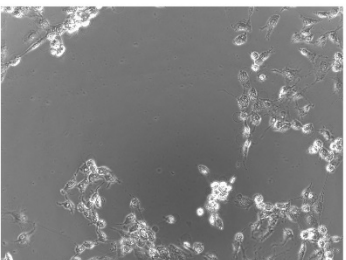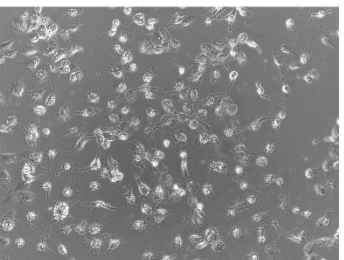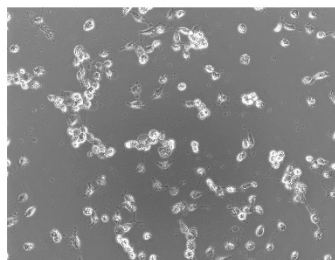

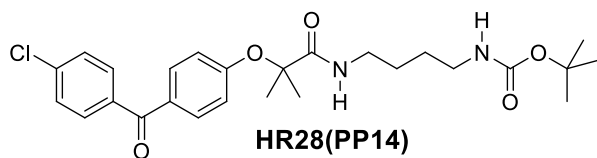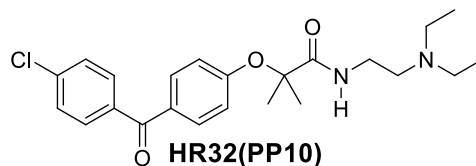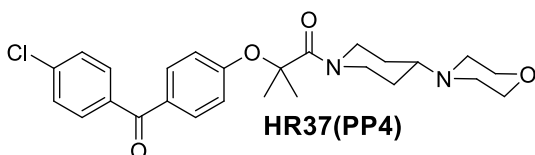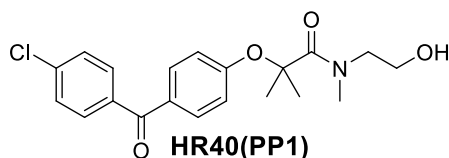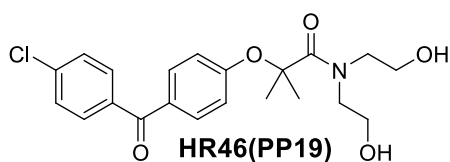

| Comp.       | logP | PSA   | D+A | M1LogBB | M2LogBB | M3LogBB | M4LogBB | MPO  |
|-------------|------|-------|-----|---------|---------|---------|---------|------|
| <b>HR28</b> | 5.05 | 93.73 | 6   | -0.34   | -0.48   | 0.01    | -2.96   | 1.62 |
| <b>HR32</b> | 4.51 | 58.64 | 5   | 0.36    | -0.04   | 0.28    | -1.37   | 2.97 |
| <b>HR37</b> | 3.81 | 59.08 | 5   | -0.02   | -0.16   | 0.16    | -1.55   | 3.06 |
| <b>HR40</b> | 3.31 | 66.84 | 5   | -0.49   | -0.35   | 0.01    | -1.91   | 3.97 |
| <b>HR46</b> | 2.62 | 87.07 | 7   | -1.41   | -0.75   | -0.30   | -3.87   | 3.86 |

Computed new LogBB values for our previously reported active compounds.

ClogP = calculated partitioning; PSA = Polar surface area ( $\text{\AA}^2$ ); D = hydrogen bond donor at pH = 7; A = hydrogen bond acceptor at pH = 7; MPO = Central nervous system multiparameter optimization (CNS MPO).

$M1\log BB = 0.5159 \times \log P - 0.0277 \times PSA - 0.3462$ . For  $\log BB \geq 0.3$  [Vilar, S.; Chakrabarti, M.; Costanzi, S. "Prediction of passive blood-brain partitioning: Straightforward and effective classification models based on silico derived physicochemical descriptors" *Journal of Molecular Graphics and Modelling* 2010, 28, 899-903.]

$M2\log BB = 0.152\log P - 0.0148\text{PSA} + 0.139$ . (Clark's model) from: Clark, D. E. "Rapid Calculation of Polar Molecular Surface Area and Its Application to the Prediction of Transport Phenomena. 2. Prediction of Blood-Brain Barrier Prediction" *Journal of Pharmaceutical Sciences* 1999, 88, 815-821.

$M3\log BB = 0.155 \times \log P - 0.01 \times \text{PSA} + 0.164$ . (Rishton's model) from Rishton, G. M.; LaBonte, K.; Williams, A. J.; Kassam, K.; Kolovanov, E. "Computational approaches to the prediction of blood-brain barrier permeability: A comparative analysis of central nervous system drugs secretase inhibitors for Alzheimer's disease" *Curr. Opin. Drug. Discov. Devel.* 2006, 9, 303-313.

$M4\log BB = 0.2289 \times \log P - 0.0326 \times \text{PSA} - 0.5671 \times (D + A) + 2.3420$ . For  $\log BB \geq -1$  [Vilar, S.; Chakrabarti, M.; Costanzi, S. "Prediction of passive blood-brain partitioning: Straightforward and effective classification models based on silico derived physicochemical descriptors" *Journal of Molecular Graphics and Modelling* 2010, 28, 899-903.]

These compounds are previously published in: Stalinska, J.; Houser, L.; Rak, M.; Colley, S. B.; Reiss, K.; Jursic, B. S. "Exploring anticancer activity of structurally modified benzylphenoxycetamide (BPA); I: Synthesis strategies and computational analyses of substituted BPA variants with high anti-glioblastoma potential" *Nature: Scientific Reports* 2019.
